# Supplementary material for: The psychosis human connectome project: Design and rationale for studies of visual neurophysiology
Source: PubMed Central journal article supplement — Neuroimage. Author manuscript; Available in PMC 2023 May 15. (PMC10153004; doi:10.1016/j.neuroimage.2023.120060), 2023-03-30
Supplement: NIHMS1891314-supplement-1.pdf [file NIHMS1891314-supplement-1.pdf]

**Table of contents**

\\USER

PHCP

functional

final

Localizer  
AAHScout\_32ch  
Localizer\_aligned  
BOLD\_oppPE\_AP  
BOLD\_PRF1\_AP  
BOLD\_CSS\_task1\_AP  
BOLD\_CSS\_task2\_AP  
BOLD\_CSS\_task3\_AP  
FieldMap  
t1\_mpr\_tra\_iso  
BOLD\_AP\_SE  
BOLD\_REV\_AP\_SE  
BOLD\_COP\_task1\_AP  
BOLD\_COP\_task2\_AP  
BOLD\_PRF2\_AP

## \\USER\PHCP\functional\final\Localizer

TA: 6.1 s PM: FIX Voxel size: 0.5×0.5×5.0 mmPAT: Off Rel. SNR: 1.00 : fl

**Properties**

|                                               |                    |
|-----------------------------------------------|--------------------|
| Prio recon                                    | Off                |
| Load images to viewer                         | On                 |
| Inline movie                                  | Off                |
| Auto store images                             | On                 |
| Load images to stamp segments                 | Off                |
| Load images to graphic segments               | Off                |
| Auto open inline display                      | Off                |
| Auto close inline display                     | Off                |
| Start measurement without further preparation | Off                |
| Wait for user to start                        | Off                |
| Start measurements                            | Single measurement |

**Routine**

|                    |                    |
|--------------------|--------------------|
| Slice group        | 1                  |
| Slices             | 1                  |
| Dist. factor       | 20 %               |
| Position           | L0.0 A50.0 H0.0 mm |
| Orientation        | Sagittal           |
| Phase enc. dir.    | A >> P             |
| Slice group        | 2                  |
| Slices             | 1                  |
| Dist. factor       | 20 %               |
| Position           | Isocenter          |
| Orientation        | Transversal        |
| Phase enc. dir.    | A >> P             |
| Slice group        | 3                  |
| Slices             | 1                  |
| Dist. factor       | 20 %               |
| Position           | Isocenter          |
| Orientation        | Coronal            |
| Phase enc. dir.    | R >> L             |
| AutoAlign          | ---                |
| Phase oversampling | 0 %                |
| FoV read           | 250 mm             |
| FoV phase          | 100.0 %            |
| Slice thickness    | 5.0 mm             |
| TR                 | 6.6 ms             |
| TE                 | 2.67 ms            |
| Averages           | 1                  |
| Concatenations     | 3                  |
| Filter             | Elliptical filter  |
| Coil elements      | A32                |

**Contrast - Common**

|                   |         |
|-------------------|---------|
| TR                | 6.6 ms  |
| TE                | 2.67 ms |
| TD                | 0 ms    |
| MTC               | Off     |
| Magn. preparation | None    |
| Flip angle        | 10 deg  |
| Fat suppr.        | None    |
| Water suppr.      | None    |
| SWI               | Off     |

**Contrast - Dynamic**

|                |            |
|----------------|------------|
| Averages       | 1          |
| Averaging mode | Short term |
| Reconstruction | Magnitude  |
| Measurements   | 1          |

**Contrast - Dynamic**

|                 |                  |
|-----------------|------------------|
| Multiple series | Each measurement |
|-----------------|------------------|

**Resolution - Common**

|                       |         |
|-----------------------|---------|
| FoV read              | 250 mm  |
| FoV phase             | 100.0 % |
| Slice thickness       | 5.0 mm  |
| Base resolution       | 256     |
| Phase resolution      | 90 %    |
| Phase partial Fourier | Off     |
| Interpolation         | On      |

**Resolution - iPAT**

|          |      |
|----------|------|
| PAT mode | None |
|----------|------|

**Resolution - Filter Image**

|                   |     |
|-------------------|-----|
| Image Filter      | Off |
| Distortion Corr.  | Off |
| Prescan Normalize | Off |
| Normalize         | Off |
| B1 filter         | Off |

**Resolution - Filter Rawdata**

|                   |     |
|-------------------|-----|
| Raw filter        | Off |
| Elliptical filter | On  |

**Geometry - Common**

|                  |                    |
|------------------|--------------------|
| Slice group      | 1                  |
| Slices           | 1                  |
| Dist. factor     | 20 %               |
| Position         | L0.0 A50.0 H0.0 mm |
| Orientation      | Sagittal           |
| Phase enc. dir.  | A >> P             |
| Slice group      | 2                  |
| Slices           | 1                  |
| Dist. factor     | 20 %               |
| Position         | Isocenter          |
| Orientation      | Transversal        |
| Phase enc. dir.  | A >> P             |
| Slice group      | 3                  |
| Slices           | 1                  |
| Dist. factor     | 20 %               |
| Position         | Isocenter          |
| Orientation      | Coronal            |
| Phase enc. dir.  | R >> L             |
| FoV read         | 250 mm             |
| FoV phase        | 100.0 %            |
| Slice thickness  | 5.0 mm             |
| TR               | 6.6 ms             |
| Multi-slice mode | Sequential         |
| Series           | Interleaved        |
| Concatenations   | 3                  |

**Geometry - AutoAlign**

|                 |                    |
|-----------------|--------------------|
| Slice group     | 1                  |
| Position        | L0.0 A50.0 H0.0 mm |
| Orientation     | Sagittal           |
| Phase enc. dir. | A >> P             |
| Slice group     | 2                  |
| Position        | Isocenter          |
| Orientation     | Transversal        |

**Geometry - AutoAlign**

|                     |                 |
|---------------------|-----------------|
| Phase enc. dir.     | A >> P          |
| Slice group         | 3               |
| Position            | Isocenter       |
| Orientation         | Coronal         |
| Phase enc. dir.     | R >> L          |
| AutoAlign           | ---             |
| Initial Position    | L0.0 A50.0 H0.0 |
| L                   | 0.0 mm          |
| A                   | 50.0 mm         |
| H                   | 0.0 mm          |
| Initial Rotation    | 0.00 deg        |
| Initial Orientation | Sagittal        |

**Geometry - Saturation**

|                 |          |
|-----------------|----------|
| Saturation mode | Standard |
| Fat suppr.      | None     |
| Water suppr.    | None     |
| Special sat.    | None     |

**Geometry - Tim Planning Suite**

|                   |      |
|-------------------|------|
| Set-n-Go Protocol | Off  |
| Table position    | H    |
| Table position    | 0 mm |
| Inline Composing  | Off  |

**Geometry - Tim CT**

|                 |         |
|-----------------|---------|
| Tim CT mode     | Off     |
| Slices          | 1       |
| Slice thickness | 5.0 mm  |
| Dist. factor    | 20 %    |
| FoV read        | 250 mm  |
| FoV phase       | 100.0 % |
| Segments        | 1       |

**System - Miscellaneous**

|                     |                      |
|---------------------|----------------------|
| Positioning mode    | FIX                  |
| Table position      | F                    |
| Table position      | 0 mm                 |
| MSMA                | S - C - T            |
| Sagittal            | R >> L               |
| Coronal             | A >> P               |
| Transversal         | F >> H               |
| Coil Combine Mode   | Adaptive Combine     |
| Save uncombined     | Off                  |
| Matrix Optimization | Off                  |
| AutoAlign           | ---                  |
| Coil Select Mode    | Off - AutoCoilSelect |

**System - Adjustments**

|                          |          |
|--------------------------|----------|
| B0 Shim mode             | Tune up  |
| B1 Shim mode             | TrueForm |
| Confirm freq. adjustment | Off      |
| Assume Dominant Fat      | Off      |
| Assume Silicone          | Off      |
| Adjustment Tolerance     | Auto     |

**System - Adjust Volume**

|             |             |
|-------------|-------------|
| Position    | Isocenter   |
| Orientation | Transversal |
| Rotation    | 0.00 deg    |
| A >> P      | 263 mm      |
| R >> L      | 350 mm      |
| F >> H      | 350 mm      |
| Reset       | Off         |

**System - Tx/Rx**

|                     |                |
|---------------------|----------------|
| Frequency 1H        | 297.207726 MHz |
| Correction factor   | 1              |
| Gain                | High           |
| Img. Scale Cor.     | 1.000          |
| Reset               | Off            |
| ? Ref. amplitude 1H | 0.000 V        |

**Physio - Signal1**

|                 |        |
|-----------------|--------|
| 1st Signal/Mode | None   |
| TR              | 6.6 ms |
| Concatenations  | 3      |
| Segments        | 1      |

**Physio - Cardiac**

|                   |         |
|-------------------|---------|
| Tagging           | None    |
| Magn. preparation | None    |
| Fat suppr.        | None    |
| Dark blood        | Off     |
| FoV read          | 250 mm  |
| FoV phase         | 100.0 % |
| Phase resolution  | 90 %    |

**Physio - PACE**

|                |     |
|----------------|-----|
| Resp. control  | Off |
| Concatenations | 3   |

**Inline - Common**

|                      |     |
|----------------------|-----|
| Subtract             | Off |
| Measurements         | 1   |
| StdDev               | Off |
| Liver registration   | Off |
| Save original images | On  |

**Inline - MIP**

|                      |     |
|----------------------|-----|
| MIP-Sag              | Off |
| MIP-Cor              | Off |
| MIP-Tra              | Off |
| MIP-Time             | Off |
| Save original images | On  |

**Inline - Soft Tissue**

|              |     |
|--------------|-----|
| Wash - In    | Off |
| Wash - Out   | Off |
| TTP          | Off |
| PEI          | Off |
| MIP - time   | Off |
| Measurements | 1   |

**Inline - Composing**

|                  |     |
|------------------|-----|
| Inline Composing | Off |
| Distortion Corr. | Off |

**Inline - MapIt**

|                      |         |
|----------------------|---------|
| Save original images | On      |
| MapIt                | None    |
| Flip angle           | 10 deg  |
| Measurements         | 1       |
| Contrasts            | 1       |
| TR                   | 6.6 ms  |
| TE                   | 2.67 ms |

**Sequence - Part 1**

|              |    |
|--------------|----|
| Introduction | On |
|--------------|----|

**Sequence - Part 1**

|                     |            |
|---------------------|------------|
| Dimension           | 2D         |
| Phase stabilisation | Off        |
| Asymmetric echo     | Allowed    |
| Contrasts           | 1          |
| Flow comp.          | No         |
| Multi-slice mode    | Sequential |
| Bandwidth           | 320 Hz/Px  |

**Sequence - Part 2**

|                          |            |
|--------------------------|------------|
| Segments                 | 1          |
| Acoustic noise reduction | None       |
| RF pulse type            | Normal     |
| Gradient mode            | Normal     |
| Excitation               | Slice-sel. |
| RF spoiling              | On         |

**Sequence - Nuclei**

|                       |      |
|-----------------------|------|
| TX/RX Nucleus         | 1H   |
| TX/RX delta frequency | 0 Hz |
| TX Nucleus            | None |
| TX delta frequency    | 0 Hz |
| Coil elements         | A32  |

**Sequence - Assistant**

|      |     |
|------|-----|
| Mode | Off |
|------|-----|

\\USER\PHCP\functional\final\AAHScout\_32ch

TA: 0:18 PM: REF Voxel size: 1.6×1.6×1.6 mmPAT: 2 Rel. SNR: 1.00 : fl

**Properties**

|                                               |                    |
|-----------------------------------------------|--------------------|
| Prio recon                                    | Off                |
| Load images to viewer                         | On                 |
| Inline movie                                  | Off                |
| Auto store images                             | On                 |
| Load images to stamp segments                 | On                 |
| Load images to graphic segments               | On                 |
| Auto open inline display                      | Off                |
| Auto close inline display                     | Off                |
| Start measurement without further preparation | Off                |
| Wait for user to start                        | Off                |
| Start measurements                            | Single measurement |

**Routine**

|                    |                    |
|--------------------|--------------------|
| Slab group         | 1                  |
| Slabs              | 1                  |
| Dist. factor       | 20 %               |
| Position           | L0.0 A50.0 H0.0 mm |
| Orientation        | Sagittal           |
| Phase enc. dir.    | A >> P             |
| Phase oversampling | 0 %                |
| Slice oversampling | 0.0 %              |
| Slices per slab    | 128                |
| FoV read           | 260 mm             |
| FoV phase          | 100.0 %            |
| Slice thickness    | 1.6 mm             |
| TR                 | 3.25 ms            |
| TE                 | 1.53 ms            |
| Averages           | 1                  |
| Concatenations     | 1                  |
| Filter             | None               |
| Coil elements      | A32                |

**Contrast - Common**

|            |         |
|------------|---------|
| TR         | 3.25 ms |
| TE         | 1.53 ms |
| Flip angle | 16 deg  |

**Contrast - Dynamic**

|                |            |
|----------------|------------|
| Averages       | 1          |
| Averaging mode | Short term |
| Reconstruction | Magnitude  |
| Measurements   | 1          |

**Resolution - Common**

|                       |           |
|-----------------------|-----------|
| FoV read              | 260 mm    |
| FoV phase             | 100.0 %   |
| Slice thickness       | 1.6 mm    |
| Base resolution       | 160       |
| Phase resolution      | 100 %     |
| Slice resolution      | 69 %      |
| Phase partial Fourier | 6/8       |
| Slice partial Fourier | 6/8       |
| Trajectory            | Cartesian |

**Resolution - iPAT**

|                  |        |
|------------------|--------|
| PAT mode         | GRAPPA |
| Accel. factor PE | 2      |
| Ref. lines PE    | 24     |
| Accel. factor 3D | 1      |

**Resolution - iPAT**

|                     |            |
|---------------------|------------|
| Reference scan mode | Integrated |
|---------------------|------------|

**Resolution - Filter Image**

|                   |     |
|-------------------|-----|
| Image Filter      | Off |
| Distortion Corr.  | Off |
| Prescan Normalize | Off |
| Normalize         | Off |
| B1 filter         | Off |

**Resolution - Filter Rawdata**

|                   |     |
|-------------------|-----|
| Raw filter        | Off |
| Elliptical filter | Off |

**Geometry - Common**

|                    |                    |
|--------------------|--------------------|
| Slab group         | 1                  |
| Slabs              | 1                  |
| Dist. factor       | 20 %               |
| Position           | L0.0 A50.0 H0.0 mm |
| Orientation        | Sagittal           |
| Phase enc. dir.    | A >> P             |
| Slice oversampling | 0.0 %              |
| Slices per slab    | 128                |
| FoV read           | 260 mm             |
| FoV phase          | 100.0 %            |
| Slice thickness    | 1.6 mm             |
| TR                 | 3.25 ms            |
| Multi-slice mode   | Sequential         |
| Series             | Ascending          |
| Concatenations     | 1                  |

**Geometry - AutoAlign**

|                     |                    |
|---------------------|--------------------|
| Slab group          | 1                  |
| Position            | L0.0 A50.0 H0.0 mm |
| Orientation         | Sagittal           |
| Phase enc. dir.     | A >> P             |
| Initial Position    | Isocenter          |
| L                   | 0.0 mm             |
| P                   | 0.0 mm             |
| H                   | 0.0 mm             |
| Initial Rotation    | 0.00 deg           |
| Initial Orientation | Transversal        |

**Geometry - Tim Planning Suite**

|                   |      |
|-------------------|------|
| Set-n-Go Protocol | Off  |
| Table position    | H    |
| Table position    | 0 mm |
| Inline Composing  | Off  |

**System - Miscellaneous**

|                     |                      |
|---------------------|----------------------|
| Positioning mode    | REF                  |
| Table position      | H                    |
| Table position      | 0 mm                 |
| MSMA                | S - C - T            |
| Sagittal            | R >> L               |
| Coronal             | A >> P               |
| Transversal         | F >> H               |
| Coil Combine Mode   | Adaptive Combine     |
| Save uncombined     | Off                  |
| Matrix Optimization | Off                  |
| Coil Select Mode    | Off - AutoCoilSelect |

**System - Adjustments**

|                          |          |
|--------------------------|----------|
| B0 Shim mode             | Tune up  |
| B1 Shim mode             | TrueForm |
| Confirm freq. adjustment | Off      |
| Assume Dominant Fat      | Off      |
| Assume Silicone          | Off      |
| Adjustment Tolerance     | Auto     |

**System - Adjust Volume**

|               |                     |
|---------------|---------------------|
| ! Position    | L0.0 A46.1 F28.8 mm |
| ! Orientation | T > C-0.7           |
| ! Rotation    | 0.00 deg            |
| ! A >> P      | 263 mm              |
| ! R >> L      | 350 mm              |
| ! F >> H      | 350 mm              |
| Reset         | Off                 |

**System - Tx/Rx**

|                     |                |
|---------------------|----------------|
| Frequency 1H        | 297.207726 MHz |
| Correction factor   | 1              |
| Gain                | High           |
| Img. Scale Cor.     | 1.000          |
| Reset               | Off            |
| ? Ref. amplitude 1H | 0.000 V        |

**Physio - PACE**

|                |     |
|----------------|-----|
| Resp. control  | Off |
| Concatenations | 1   |

**Inline - Common**

|                |        |
|----------------|--------|
| Flip angle     | 16 deg |
| Measurements   | 1      |
| Time to center | 7.7 s  |

**Inline - Inline**

|                      |     |
|----------------------|-----|
| Subtract             | Off |
| Measurements         | 1   |
| StdDev               | Off |
| Save original images | On  |

**Inline - MIP**

|                      |     |
|----------------------|-----|
| MIP-Sag              | Off |
| MIP-Cor              | Off |
| MIP-Tra              | Off |
| MIP-Time             | Off |
| Save original images | On  |

**Inline - Composing**

|                  |     |
|------------------|-----|
| Inline Composing | Off |
| Distortion Corr. | Off |

**Inline - MapIt**

|                      |         |
|----------------------|---------|
| Save original images | On      |
| MapIt                | None    |
| Flip angle           | 16 deg  |
| Measurements         | 1       |
| Contrasts            | 1       |
| TR                   | 3.25 ms |
| TE                   | 1.53 ms |

**Sequence - Part 1**

|                 |      |
|-----------------|------|
| Introduction    | On   |
| Dimension       | 3D   |
| Asymmetric echo | Weak |

**Sequence - Part 1**

|                  |            |
|------------------|------------|
| Contrasts        | 1          |
| Multi-slice mode | Sequential |
| Bandwidth        | 540 Hz/Px  |

**Sequence - Part 2**

|               |          |
|---------------|----------|
| RF pulse type | Fast     |
| Gradient mode | Normal   |
| Excitation    | Non-sel. |
| RF spoiling   | On       |

**Sequence - Nuclei**

|                       |      |
|-----------------------|------|
| TX/RX Nucleus         | 1H   |
| TX/RX delta frequency | 0 Hz |
| TX Nucleus            | None |
| TX delta frequency    | 0 Hz |
| Coil elements         | A32  |

**Sequence - Assistant**

|      |     |
|------|-----|
| Mode | Off |
|------|-----|

\\USER\PHCP\functional\final\Localizer\_aligned

TA: 0:24 PM: FIX Voxel size: 0.5×0.5×5.0 mmPAT: Off Rel. SNR: 1.00 : fl

**Properties**

|                                               |                    |
|-----------------------------------------------|--------------------|
| Prio recon                                    | Off                |
| Load images to viewer                         | On                 |
| Inline movie                                  | Off                |
| Auto store images                             | On                 |
| Load images to stamp segments                 | On                 |
| Load images to graphic segments               | On                 |
| Auto open inline display                      | Off                |
| Auto close inline display                     | Off                |
| Start measurement without further preparation | On                 |
| Wait for user to start                        | Off                |
| Start measurements                            | Single measurement |

**Routine**

|                    |                   |
|--------------------|-------------------|
| Slice group        | 1                 |
| Slices             | 5                 |
| Dist. factor       | 400 %             |
| Position           | Isocenter         |
| Orientation        | Coronal           |
| Phase enc. dir.    | R >> L            |
| Slice group        | 2                 |
| Slices             | 5                 |
| Dist. factor       | 600 %             |
| Position           | Isocenter         |
| Orientation        | Transversal       |
| Phase enc. dir.    | L >> R            |
| Slice group        | 3                 |
| Slices             | 5                 |
| Dist. factor       | 300 %             |
| Position           | Isocenter         |
| Orientation        | Sagittal          |
| Phase enc. dir.    | A >> P            |
| AutoAlign          | Head > Brain      |
| Phase oversampling | 0 %               |
| FoV read           | 250 mm            |
| FoV phase          | 100.0 %           |
| Slice thickness    | 5.0 mm            |
| TR                 | 6.6 ms            |
| TE                 | 2.67 ms           |
| Averages           | 1                 |
| Concatenations     | 15                |
| Filter             | Elliptical filter |
| Coil elements      | A32               |

**Contrast - Common**

|                   |         |
|-------------------|---------|
| TR                | 6.6 ms  |
| TE                | 2.67 ms |
| TD                | 0 ms    |
| MTC               | Off     |
| Magn. preparation | None    |
| Flip angle        | 10 deg  |
| Fat suppr.        | None    |
| Water suppr.      | None    |
| SWI               | Off     |

**Contrast - Dynamic**

|                |            |
|----------------|------------|
| Averages       | 1          |
| Averaging mode | Short term |
| Reconstruction | Magnitude  |
| Measurements   | 1          |

**Contrast - Dynamic**

|                 |                  |
|-----------------|------------------|
| Multiple series | Each measurement |
|-----------------|------------------|

**Resolution - Common**

|                       |         |
|-----------------------|---------|
| FoV read              | 250 mm  |
| FoV phase             | 100.0 % |
| Slice thickness       | 5.0 mm  |
| Base resolution       | 256     |
| Phase resolution      | 90 %    |
| Phase partial Fourier | Off     |
| Interpolation         | On      |

**Resolution - iPAT**

|          |      |
|----------|------|
| PAT mode | None |
|----------|------|

**Resolution - Filter Image**

|                   |     |
|-------------------|-----|
| Image Filter      | Off |
| Distortion Corr.  | Off |
| Prescan Normalize | Off |
| Normalize         | Off |
| B1 filter         | Off |

**Resolution - Filter Rawdata**

|                   |     |
|-------------------|-----|
| Raw filter        | Off |
| Elliptical filter | On  |

**Geometry - Common**

|                  |             |
|------------------|-------------|
| Slice group      | 1           |
| Slices           | 5           |
| Dist. factor     | 400 %       |
| Position         | Isocenter   |
| Orientation      | Coronal     |
| Phase enc. dir.  | R >> L      |
| Slice group      | 2           |
| Slices           | 5           |
| Dist. factor     | 600 %       |
| Position         | Isocenter   |
| Orientation      | Transversal |
| Phase enc. dir.  | L >> R      |
| Slice group      | 3           |
| Slices           | 5           |
| Dist. factor     | 300 %       |
| Position         | Isocenter   |
| Orientation      | Sagittal    |
| Phase enc. dir.  | A >> P      |
| FoV read         | 250 mm      |
| FoV phase        | 100.0 %     |
| Slice thickness  | 5.0 mm      |
| TR               | 6.6 ms      |
| Multi-slice mode | Sequential  |
| Series           | Interleaved |
| Concatenations   | 15          |

**Geometry - AutoAlign**

|                 |             |
|-----------------|-------------|
| Slice group     | 1           |
| Position        | Isocenter   |
| Orientation     | Coronal     |
| Phase enc. dir. | R >> L      |
| Slice group     | 2           |
| Position        | Isocenter   |
| Orientation     | Transversal |

**Geometry - AutoAlign**

|                     |              |
|---------------------|--------------|
| Phase enc. dir.     | L >> R       |
| Slice group         | 3            |
| Position            | Isocenter    |
| Orientation         | Sagittal     |
| Phase enc. dir.     | A >> P       |
| AutoAlign           | Head > Brain |
| Initial Position    | Isocenter    |
| L                   | 0.0 mm       |
| P                   | 0.0 mm       |
| H                   | 0.0 mm       |
| Initial Rotation    | 0.00 deg     |
| Initial Orientation | Coronal      |

**Geometry - Saturation**

|                 |          |
|-----------------|----------|
| Saturation mode | Standard |
| Fat suppr.      | None     |
| Water suppr.    | None     |
| Special sat.    | None     |

**Geometry - Tim Planning Suite**

|                   |      |
|-------------------|------|
| Set-n-Go Protocol | Off  |
| Table position    | H    |
| Table position    | 0 mm |
| Inline Composing  | Off  |

**Geometry - Tim CT**

|                 |         |
|-----------------|---------|
| Tim CT mode     | Off     |
| Slices          | 5       |
| Slice thickness | 5.0 mm  |
| Dist. factor    | 300 %   |
| FoV read        | 250 mm  |
| FoV phase       | 100.0 % |
| Segments        | 1       |

**System - Miscellaneous**

|                     |                      |
|---------------------|----------------------|
| Positioning mode    | FIX                  |
| Table position      | F                    |
| Table position      | 0 mm                 |
| MSMA                | S - C - T            |
| Sagittal            | R >> L               |
| Coronal             | A >> P               |
| Transversal         | F >> H               |
| Coil Combine Mode   | Adaptive Combine     |
| Save uncombined     | Off                  |
| Matrix Optimization | Off                  |
| AutoAlign           | Head > Brain         |
| Coil Select Mode    | Off - AutoCoilSelect |

**System - Adjustments**

|                          |          |
|--------------------------|----------|
| B0 Shim mode             | Tune up  |
| B1 Shim mode             | TrueForm |
| Confirm freq. adjustment | Off      |
| Assume Dominant Fat      | Off      |
| Assume Silicone          | Off      |
| Adjustment Tolerance     | Auto     |

**System - Adjust Volume**

|             |             |
|-------------|-------------|
| Position    | Isocenter   |
| Orientation | Transversal |
| Rotation    | 0.00 deg    |
| A >> P      | 263 mm      |
| R >> L      | 350 mm      |
| F >> H      | 350 mm      |
| Reset       | Off         |

**System - Tx/Rx**

|                     |                |
|---------------------|----------------|
| Frequency 1H        | 297.207726 MHz |
| Correction factor   | 1              |
| Gain                | High           |
| Img. Scale Cor.     | 1.000          |
| Reset               | Off            |
| ? Ref. amplitude 1H | 0.000 V        |

**Physio - Signal1**

|                 |        |
|-----------------|--------|
| 1st Signal/Mode | None   |
| TR              | 6.6 ms |
| Concatenations  | 15     |
| Segments        | 1      |

**Physio - Cardiac**

|                   |         |
|-------------------|---------|
| Tagging           | None    |
| Magn. preparation | None    |
| Fat suppr.        | None    |
| Dark blood        | Off     |
| FoV read          | 250 mm  |
| FoV phase         | 100.0 % |
| Phase resolution  | 90 %    |

**Physio - PACE**

|                |     |
|----------------|-----|
| Resp. control  | Off |
| Concatenations | 15  |

**Inline - Common**

|                      |     |
|----------------------|-----|
| Subtract             | Off |
| Measurements         | 1   |
| StdDev               | Off |
| Liver registration   | Off |
| Save original images | On  |

**Inline - MIP**

|                      |     |
|----------------------|-----|
| MIP-Sag              | Off |
| MIP-Cor              | Off |
| MIP-Tra              | Off |
| MIP-Time             | Off |
| Save original images | On  |

**Inline - Soft Tissue**

|              |     |
|--------------|-----|
| Wash - In    | Off |
| Wash - Out   | Off |
| TTP          | Off |
| PEI          | Off |
| MIP - time   | Off |
| Measurements | 1   |

**Inline - Composing**

|                  |     |
|------------------|-----|
| Inline Composing | Off |
| Distortion Corr. | Off |

**Inline - MapIt**

|                      |         |
|----------------------|---------|
| Save original images | On      |
| MapIt                | None    |
| Flip angle           | 10 deg  |
| Measurements         | 1       |
| Contrasts            | 1       |
| TR                   | 6.6 ms  |
| TE                   | 2.67 ms |

**Sequence - Part 1**

|              |    |
|--------------|----|
| Introduction | On |
|--------------|----|



**Sequence - Part 1**

|                     |            |
|---------------------|------------|
| Dimension           | 2D         |
| Phase stabilisation | Off        |
| Asymmetric echo     | Allowed    |
| Contrasts           | 1          |
| Flow comp.          | No         |
| Multi-slice mode    | Sequential |
| Bandwidth           | 320 Hz/Px  |

**Sequence - Part 2**

|                          |            |
|--------------------------|------------|
| Segments                 | 1          |
| Acoustic noise reduction | None       |
| RF pulse type            | Normal     |
| Gradient mode            | Normal     |
| Excitation               | Slice-sel. |
| RF spoiling              | On         |

**Sequence - Nuclei**

|                       |      |
|-----------------------|------|
| TX/RX Nucleus         | 1H   |
| TX/RX delta frequency | 0 Hz |
| TX Nucleus            | None |
| TX delta frequency    | 0 Hz |
| Coil elements         | A32  |

**Sequence - Assistant**

|      |     |
|------|-----|
| Mode | Off |
|------|-----|

\\USER\PHCP\functional\final\BOLD\_oppPE\_AP

TA: 1:22 PM: FIX Voxel size: 1.6×1.6×1.6 mmPAT: 2 Rel. SNR: 1.00 : epfid

**Properties**

|                                               |                    |
|-----------------------------------------------|--------------------|
| Prio recon                                    | Off                |
| Load images to viewer                         | Off                |
| Inline movie                                  | Off                |
| Auto store images                             | On                 |
| Load images to stamp segments                 | Off                |
| Load images to graphic segments               | Off                |
| Auto open inline display                      | On                 |
| Auto close inline display                     | Off                |
| Start measurement without further preparation | Off                |
| Wait for user to start                        | On                 |
| Start measurements                            | Single measurement |

**Routine**

|                          |                    |
|--------------------------|--------------------|
| Slice group              | 1                  |
| Slices                   | 85                 |
| Dist. factor             | 0 %                |
| Position                 | L0.0 P13.6 H7.5 mm |
| Orientation              | T > C-20.0         |
| Phase enc. dir.          | A >> P             |
| AutoAlign                | Head > Brain       |
| Phase oversampling       | 0 %                |
| FoV read                 | 208 mm             |
| FoV phase                | 100.0 %            |
| Slice thickness          | 1.60 mm            |
| TR                       | 1000 ms            |
| TE                       | 22.20 ms           |
| Multi-band accel. factor | 5                  |
| Filter                   | None               |
| Coil elements            | A32                |

**Contrast - Common**

|                   |          |
|-------------------|----------|
| TR                | 1000 ms  |
| TE                | 22.20 ms |
| MTC               | Off      |
| Magn. preparation | None     |
| Flip angle        | 45 deg   |
| Fat suppr.        | Fat sat. |

**Contrast - Dynamic**

|                 |           |
|-----------------|-----------|
| Averaging mode  | Long term |
| Reconstruction  | Magnitude |
| Measurements    | 3         |
| Delay in TR     | 0 ms      |
| Multiple series | Off       |

**Resolution - Common**

|                       |         |
|-----------------------|---------|
| FoV read              | 208 mm  |
| FoV phase             | 100.0 % |
| Slice thickness       | 1.60 mm |
| Base resolution       | 130     |
| Phase resolution      | 100 %   |
| Phase partial Fourier | 7/8     |
| Interpolation         | Off     |

**Resolution - iPAT**

|                     |        |
|---------------------|--------|
| PAT mode            | GRAPPA |
| Accel. factor PE    | 2      |
| Ref. lines PE       | 96     |
| Reference scan mode | GRE    |

**Resolution - Filter Image**

|                   |     |
|-------------------|-----|
| Distortion Corr.  | Off |
| Prescan Normalize | Off |

**Resolution - Filter Rawdata**

|                   |     |
|-------------------|-----|
| Raw filter        | Off |
| Elliptical filter | Off |
| Hamming           | Off |

**Geometry - Common**

|                          |                    |
|--------------------------|--------------------|
| Slice group              | 1                  |
| Slices                   | 85                 |
| Dist. factor             | 0 %                |
| Position                 | L0.0 P13.6 H7.5 mm |
| Orientation              | T > C-20.0         |
| Phase enc. dir.          | A >> P             |
| FoV read                 | 208 mm             |
| FoV phase                | 100.0 %            |
| Slice thickness          | 1.60 mm            |
| TR                       | 1000 ms            |
| Multi-slice mode         | Interleaved        |
| Series                   | Interleaved        |
| Multi-band accel. factor | 5                  |

**Geometry - AutoAlign**

|                     |                    |
|---------------------|--------------------|
| Slice group         | 1                  |
| Position            | L0.0 P13.6 H7.5 mm |
| Orientation         | T > C-20.0         |
| Phase enc. dir.     | A >> P             |
| AutoAlign           | Head > Brain       |
| Initial Position    | L0.0 P13.6 H7.5    |
| L                   | 0.0 mm             |
| P                   | 13.6 mm            |
| H                   | 7.5 mm             |
| Initial Rotation    | -0.52 deg          |
| Initial Orientation | T > C              |
| T > C               | -20.0              |
| > S                 | 0.0                |

**Geometry - Saturation**

|              |          |
|--------------|----------|
| Fat suppr.   | Fat sat. |
| Special sat. | None     |

**Geometry - Tim Planning Suite**

|                   |      |
|-------------------|------|
| Set-n-Go Protocol | Off  |
| Table position    | H    |
| Table position    | 0 mm |
| Inline Composing  | Off  |

**System - Miscellaneous**

|                     |                      |
|---------------------|----------------------|
| Positioning mode    | FIX                  |
| Table position      | H                    |
| Table position      | 0 mm                 |
| MSMA                | S - C - T            |
| Sagittal            | R >> L               |
| Coronal             | A >> P               |
| Transversal         | F >> H               |
| Coil Combine Mode   | Sum of Squares       |
| Matrix Optimization | Off                  |
| AutoAlign           | Head > Brain         |
| Coil Select Mode    | Off - AutoCoilSelect |

**System - Adjustments**

|                          |          |
|--------------------------|----------|
| B0 Shim mode             | Advanced |
| B1 Shim mode             | TrueForm |
| Confirm freq. adjustment | Off      |
| Assume Dominant Fat      | Off      |
| Assume Silicone          | Off      |
| Adjustment Tolerance     | Auto     |

**System - Adjust Volume**

|               |                    |
|---------------|--------------------|
| ! Position    | L0.7 P13.2 H9.5 mm |
| ! Orientation | T > C-15.6 > S0.3  |
| ! Rotation    | 0.00 deg           |
| ! A >> P      | 170 mm             |
| ! R >> L      | 130 mm             |
| ! F >> H      | 120 mm             |
| Reset         | Off                |

**System - Tx/Rx**

|                     |                |
|---------------------|----------------|
| Frequency 1H        | 297.207726 MHz |
| Correction factor   | 1              |
| Gain                | High           |
| Img. Scale Cor.     | 1.000          |
| Reset               | Off            |
| ? Ref. amplitude 1H | 0.000 V        |

**Physio - Signal1**

|                          |         |
|--------------------------|---------|
| 1st Signal/Mode          | None    |
| TR                       | 1000 ms |
| Multi-band accel. factor | 5       |

**BOLD**

|                         |          |
|-------------------------|----------|
| GLM Statistics          | Off      |
| Dynamic t-maps          | Off      |
| Ignore meas. at start   | 0        |
| Ignore after transition | 0        |
| Model transition states | On       |
| Temp. highpass filter   | On       |
| Threshold               | 4.00     |
| Paradigm size           | 20       |
| Meas[1]                 | Baseline |
| Meas[2]                 | Baseline |
| Meas[3]                 | Baseline |
| Meas[4]                 | Baseline |
| Meas[5]                 | Baseline |
| Meas[6]                 | Baseline |
| Meas[7]                 | Baseline |
| Meas[8]                 | Baseline |
| Meas[9]                 | Baseline |
| Meas[10]                | Baseline |
| Meas[11]                | Active   |
| Meas[12]                | Active   |
| Meas[13]                | Active   |
| Meas[14]                | Active   |
| Meas[15]                | Active   |
| Meas[16]                | Active   |
| Meas[17]                | Active   |
| Meas[18]                | Active   |
| Meas[19]                | Active   |
| Meas[20]                | Active   |
| Motion correction       | Off      |
| Spatial filter          | Off      |
| Measurements            | 3        |
| Delay in TR             | 0 ms     |
| Multiple series         | Off      |

**Sequence - Part 1**

|                   |             |
|-------------------|-------------|
| Introduction      | Off         |
| Contrasts         | 1           |
| Flow comp.        | No          |
| Multi-slice mode  | Interleaved |
| Free echo spacing | Off         |
| Echo spacing      | 0.64 ms     |
| Bandwidth         | 1924 Hz/Px  |

**Sequence - Part 2**

|               |        |
|---------------|--------|
| EPI factor    | 130    |
| Gradient mode | Normal |
| RF spoiling   | Off    |

**Sequence - Special**

|                          |           |
|--------------------------|-----------|
| Excite pulse duration    | 5760 us   |
| Single-band images       | On        |
| MB LeakBlock kernel      | Off       |
| MB dual kernel           | Off       |
| MB RF phase scramble     | On        |
| SENSE1 coil combine      | Off       |
| Invert RO/PE polarity    | On        |
| PF omits higher k-space  | Off       |
| Disable freq. update     | Off       |
| Force equal slice timing | Off       |
| Online multi-band recon. | Online    |
| FFT scale factor         | 0.60      |
| Fat saturation FA        | 110.0 deg |
| GRE iPAT ref. FA         | 12.0 deg  |
| Physio recording         | Off       |
| Triggering scheme        | Standard  |

\\USER\PHCP\functional\final\BOLD\_PR1\_AP

TA: 6:43 PM: FIX Voxel size: 1.6×1.6×1.6 mmPAT: 2 Rel. SNR: 1.00 : epfid

**Properties**

|                                               |                    |
|-----------------------------------------------|--------------------|
| Prio recon                                    | Off                |
| Load images to viewer                         | Off                |
| Inline movie                                  | Off                |
| Auto store images                             | On                 |
| Load images to stamp segments                 | Off                |
| Load images to graphic segments               | Off                |
| Auto open inline display                      | On                 |
| Auto close inline display                     | Off                |
| Start measurement without further preparation | Off                |
| Wait for user to start                        | On                 |
| Start measurements                            | Single measurement |

**Routine**

|                          |                    |
|--------------------------|--------------------|
| Slice group              | 1                  |
| Slices                   | 85                 |
| Dist. factor             | 0 %                |
| Position                 | L0.0 P13.6 H7.5 mm |
| Orientation              | T > C-20.0         |
| Phase enc. dir.          | A >> P             |
| AutoAlign                | Head > Brain       |
| Phase oversampling       | 0 %                |
| FoV read                 | 208 mm             |
| FoV phase                | 100.0 %            |
| Slice thickness          | 1.60 mm            |
| TR                       | 1000 ms            |
| TE                       | 22.20 ms           |
| Multi-band accel. factor | 5                  |
| Filter                   | None               |
| Coil elements            | A32                |

**Contrast - Common**

|                   |          |
|-------------------|----------|
| TR                | 1000 ms  |
| TE                | 22.20 ms |
| MTC               | Off      |
| Magn. preparation | None     |
| Flip angle        | 45 deg   |
| Fat suppr.        | Fat sat. |

**Contrast - Dynamic**

|                 |           |
|-----------------|-----------|
| Averaging mode  | Long term |
| Reconstruction  | Magnitude |
| Measurements    | 324       |
| Delay in TR     | 0 ms      |
| Multiple series | Off       |

**Resolution - Common**

|                       |         |
|-----------------------|---------|
| FoV read              | 208 mm  |
| FoV phase             | 100.0 % |
| Slice thickness       | 1.60 mm |
| Base resolution       | 130     |
| Phase resolution      | 100 %   |
| Phase partial Fourier | 7/8     |
| Interpolation         | Off     |

**Resolution - iPAT**

|                     |        |
|---------------------|--------|
| PAT mode            | GRAPPA |
| Accel. factor PE    | 2      |
| Ref. lines PE       | 96     |
| Reference scan mode | GRE    |

**Resolution - Filter Image**

|                   |     |
|-------------------|-----|
| Distortion Corr.  | Off |
| Prescan Normalize | Off |

**Resolution - Filter Rawdata**

|                   |     |
|-------------------|-----|
| Raw filter        | Off |
| Elliptical filter | Off |
| Hamming           | Off |

**Geometry - Common**

|                          |                    |
|--------------------------|--------------------|
| Slice group              | 1                  |
| Slices                   | 85                 |
| Dist. factor             | 0 %                |
| Position                 | L0.0 P13.6 H7.5 mm |
| Orientation              | T > C-20.0         |
| Phase enc. dir.          | A >> P             |
| FoV read                 | 208 mm             |
| FoV phase                | 100.0 %            |
| Slice thickness          | 1.60 mm            |
| TR                       | 1000 ms            |
| Multi-slice mode         | Interleaved        |
| Series                   | Interleaved        |
| Multi-band accel. factor | 5                  |

**Geometry - AutoAlign**

|                     |                    |
|---------------------|--------------------|
| Slice group         | 1                  |
| Position            | L0.0 P13.6 H7.5 mm |
| Orientation         | T > C-20.0         |
| Phase enc. dir.     | A >> P             |
| AutoAlign           | Head > Brain       |
| Initial Position    | L0.0 P13.6 H7.5    |
| L                   | 0.0 mm             |
| P                   | 13.6 mm            |
| H                   | 7.5 mm             |
| Initial Rotation    | -0.52 deg          |
| Initial Orientation | T > C              |
| T > C               | -20.0              |
| > S                 | 0.0                |

**Geometry - Saturation**

|              |          |
|--------------|----------|
| Fat suppr.   | Fat sat. |
| Special sat. | None     |

**Geometry - Tim Planning Suite**

|                   |      |
|-------------------|------|
| Set-n-Go Protocol | Off  |
| Table position    | H    |
| Table position    | 0 mm |
| Inline Composing  | Off  |

**System - Miscellaneous**

|                     |                      |
|---------------------|----------------------|
| Positioning mode    | FIX                  |
| Table position      | H                    |
| Table position      | 0 mm                 |
| MSMA                | S - C - T            |
| Sagittal            | R >> L               |
| Coronal             | A >> P               |
| Transversal         | F >> H               |
| Coil Combine Mode   | Sum of Squares       |
| Matrix Optimization | Off                  |
| AutoAlign           | Head > Brain         |
| Coil Select Mode    | Off - AutoCoilSelect |

**System - Adjustments**

|                          |          |
|--------------------------|----------|
| B0 Shim mode             | Advanced |
| B1 Shim mode             | TrueForm |
| Confirm freq. adjustment | Off      |
| Assume Dominant Fat      | Off      |
| Assume Silicone          | Off      |
| Adjustment Tolerance     | Auto     |

**System - Adjust Volume**

|               |                    |
|---------------|--------------------|
| ! Position    | L0.7 P13.2 H9.5 mm |
| ! Orientation | T > C-15.6 > S0.3  |
| ! Rotation    | 0.00 deg           |
| ! A >> P      | 170 mm             |
| ! R >> L      | 130 mm             |
| ! F >> H      | 120 mm             |
| Reset         | Off                |

**System - Tx/Rx**

|                     |                |
|---------------------|----------------|
| Frequency 1H        | 297.207726 MHz |
| Correction factor   | 1              |
| Gain                | High           |
| Img. Scale Cor.     | 1.000          |
| Reset               | Off            |
| ? Ref. amplitude 1H | 0.000 V        |

**Physio - Signal1**

|                          |         |
|--------------------------|---------|
| 1st Signal/Mode          | None    |
| TR                       | 1000 ms |
| Multi-band accel. factor | 5       |

**BOLD**

|                         |          |
|-------------------------|----------|
| GLM Statistics          | Off      |
| Dynamic t-maps          | Off      |
| Ignore meas. at start   | 0        |
| Ignore after transition | 0        |
| Model transition states | On       |
| Temp. highpass filter   | On       |
| Threshold               | 4.00     |
| Paradigm size           | 20       |
| Meas[1]                 | Baseline |
| Meas[2]                 | Baseline |
| Meas[3]                 | Baseline |
| Meas[4]                 | Baseline |
| Meas[5]                 | Baseline |
| Meas[6]                 | Baseline |
| Meas[7]                 | Baseline |
| Meas[8]                 | Baseline |
| Meas[9]                 | Baseline |
| Meas[10]                | Baseline |
| Meas[11]                | Active   |
| Meas[12]                | Active   |
| Meas[13]                | Active   |
| Meas[14]                | Active   |
| Meas[15]                | Active   |
| Meas[16]                | Active   |
| Meas[17]                | Active   |
| Meas[18]                | Active   |
| Meas[19]                | Active   |
| Meas[20]                | Active   |
| Motion correction       | Off      |
| Spatial filter          | Off      |
| Measurements            | 324      |
| Delay in TR             | 0 ms     |
| Multiple series         | Off      |

**Sequence - Part 1**

|                   |             |
|-------------------|-------------|
| Introduction      | Off         |
| Contrasts         | 1           |
| Flow comp.        | No          |
| Multi-slice mode  | Interleaved |
| Free echo spacing | Off         |
| Echo spacing      | 0.64 ms     |
| Bandwidth         | 1924 Hz/Px  |

**Sequence - Part 2**

|               |        |
|---------------|--------|
| EPI factor    | 130    |
| Gradient mode | Normal |
| RF spoiling   | Off    |

**Sequence - Special**

|                          |           |
|--------------------------|-----------|
| Excite pulse duration    | 5760 us   |
| Single-band images       | On        |
| MB LeakBlock kernel      | Off       |
| MB dual kernel           | Off       |
| MB RF phase scramble     | On        |
| SENSE1 coil combine      | Off       |
| Invert RO/PE polarity    | Off       |
| PF omits higher k-space  | Off       |
| Disable freq. update     | Off       |
| Force equal slice timing | Off       |
| Online multi-band recon. | Online    |
| FFT scale factor         | 0.60      |
| Fat saturation FA        | 110.0 deg |
| GRE iPAT ref. FA         | 12.0 deg  |
| Physio recording         | Off       |
| Triggering scheme        | Standard  |

\\USER\PHCP\functional\final\BOLD\_CSS\_task1\_AP

TA: 6:16 PM: FIX Voxel size: 1.6×1.6×1.6 mmPAT: 2 Rel. SNR: 1.00 : epfid

**Properties**

|                                               |                    |
|-----------------------------------------------|--------------------|
| Prio recon                                    | Off                |
| Load images to viewer                         | Off                |
| Inline movie                                  | Off                |
| Auto store images                             | On                 |
| Load images to stamp segments                 | Off                |
| Load images to graphic segments               | Off                |
| Auto open inline display                      | On                 |
| Auto close inline display                     | Off                |
| Start measurement without further preparation | Off                |
| Wait for user to start                        | On                 |
| Start measurements                            | Single measurement |

**Routine**

|                          |                    |
|--------------------------|--------------------|
| Slice group              | 1                  |
| Slices                   | 85                 |
| Dist. factor             | 0 %                |
| Position                 | L0.0 P13.6 H7.5 mm |
| Orientation              | T > C-20.0         |
| Phase enc. dir.          | A >> P             |
| AutoAlign                | Head > Brain       |
| Phase oversampling       | 0 %                |
| FoV read                 | 208 mm             |
| FoV phase                | 100.0 %            |
| Slice thickness          | 1.60 mm            |
| TR                       | 1000 ms            |
| TE                       | 22.20 ms           |
| Multi-band accel. factor | 5                  |
| Filter                   | None               |
| Coil elements            | A32                |

**Contrast - Common**

|                   |          |
|-------------------|----------|
| TR                | 1000 ms  |
| TE                | 22.20 ms |
| MTC               | Off      |
| Magn. preparation | None     |
| Flip angle        | 45 deg   |
| Fat suppr.        | Fat sat. |

**Contrast - Dynamic**

|                 |           |
|-----------------|-----------|
| Averaging mode  | Long term |
| Reconstruction  | Magnitude |
| Measurements    | 297       |
| Delay in TR     | 0 ms      |
| Multiple series | Off       |

**Resolution - Common**

|                       |         |
|-----------------------|---------|
| FoV read              | 208 mm  |
| FoV phase             | 100.0 % |
| Slice thickness       | 1.60 mm |
| Base resolution       | 130     |
| Phase resolution      | 100 %   |
| Phase partial Fourier | 7/8     |
| Interpolation         | Off     |

**Resolution - iPAT**

|                     |        |
|---------------------|--------|
| PAT mode            | GRAPPA |
| Accel. factor PE    | 2      |
| Ref. lines PE       | 96     |
| Reference scan mode | GRE    |

**Resolution - Filter Image**

|                   |     |
|-------------------|-----|
| Distortion Corr.  | Off |
| Prescan Normalize | Off |

**Resolution - Filter Rawdata**

|                   |     |
|-------------------|-----|
| Raw filter        | Off |
| Elliptical filter | Off |
| Hamming           | Off |

**Geometry - Common**

|                          |                    |
|--------------------------|--------------------|
| Slice group              | 1                  |
| Slices                   | 85                 |
| Dist. factor             | 0 %                |
| Position                 | L0.0 P13.6 H7.5 mm |
| Orientation              | T > C-20.0         |
| Phase enc. dir.          | A >> P             |
| FoV read                 | 208 mm             |
| FoV phase                | 100.0 %            |
| Slice thickness          | 1.60 mm            |
| TR                       | 1000 ms            |
| Multi-slice mode         | Interleaved        |
| Series                   | Interleaved        |
| Multi-band accel. factor | 5                  |

**Geometry - AutoAlign**

|                     |                    |
|---------------------|--------------------|
| Slice group         | 1                  |
| Position            | L0.0 P13.6 H7.5 mm |
| Orientation         | T > C-20.0         |
| Phase enc. dir.     | A >> P             |
| AutoAlign           | Head > Brain       |
| Initial Position    | L0.0 P13.6 H7.5    |
| L                   | 0.0 mm             |
| P                   | 13.6 mm            |
| H                   | 7.5 mm             |
| Initial Rotation    | -0.52 deg          |
| Initial Orientation | T > C              |
| T > C               | -20.0              |
| > S                 | 0.0                |

**Geometry - Saturation**

|              |          |
|--------------|----------|
| Fat suppr.   | Fat sat. |
| Special sat. | None     |

**Geometry - Tim Planning Suite**

|                   |      |
|-------------------|------|
| Set-n-Go Protocol | Off  |
| Table position    | H    |
| Table position    | 0 mm |
| Inline Composing  | Off  |

**System - Miscellaneous**

|                     |                      |
|---------------------|----------------------|
| Positioning mode    | FIX                  |
| Table position      | H                    |
| Table position      | 0 mm                 |
| MSMA                | S - C - T            |
| Sagittal            | R >> L               |
| Coronal             | A >> P               |
| Transversal         | F >> H               |
| Coil Combine Mode   | Sum of Squares       |
| Matrix Optimization | Off                  |
| AutoAlign           | Head > Brain         |
| Coil Select Mode    | Off - AutoCoilSelect |

**System - Adjustments**

|                          |          |
|--------------------------|----------|
| B0 Shim mode             | Advanced |
| B1 Shim mode             | TrueForm |
| Confirm freq. adjustment | Off      |
| Assume Dominant Fat      | Off      |
| Assume Silicone          | Off      |
| Adjustment Tolerance     | Auto     |

**System - Adjust Volume**

|               |                    |
|---------------|--------------------|
| ! Position    | L0.7 P13.2 H9.5 mm |
| ! Orientation | T > C-15.6 > S0.3  |
| ! Rotation    | 0.00 deg           |
| ! A >> P      | 170 mm             |
| ! R >> L      | 130 mm             |
| ! F >> H      | 120 mm             |
| Reset         | Off                |

**System - Tx/Rx**

|                     |                |
|---------------------|----------------|
| Frequency 1H        | 297.207726 MHz |
| Correction factor   | 1              |
| Gain                | High           |
| Img. Scale Cor.     | 1.000          |
| Reset               | Off            |
| ? Ref. amplitude 1H | 0.000 V        |

**Physio - Signal1**

|                          |         |
|--------------------------|---------|
| 1st Signal/Mode          | None    |
| TR                       | 1000 ms |
| Multi-band accel. factor | 5       |

**BOLD**

|                         |          |
|-------------------------|----------|
| GLM Statistics          | Off      |
| Dynamic t-maps          | Off      |
| Ignore meas. at start   | 0        |
| Ignore after transition | 0        |
| Model transition states | On       |
| Temp. highpass filter   | On       |
| Threshold               | 4.00     |
| Paradigm size           | 20       |
| Meas[1]                 | Baseline |
| Meas[2]                 | Baseline |
| Meas[3]                 | Baseline |
| Meas[4]                 | Baseline |
| Meas[5]                 | Baseline |
| Meas[6]                 | Baseline |
| Meas[7]                 | Baseline |
| Meas[8]                 | Baseline |
| Meas[9]                 | Baseline |
| Meas[10]                | Baseline |
| Meas[11]                | Active   |
| Meas[12]                | Active   |
| Meas[13]                | Active   |
| Meas[14]                | Active   |
| Meas[15]                | Active   |
| Meas[16]                | Active   |
| Meas[17]                | Active   |
| Meas[18]                | Active   |
| Meas[19]                | Active   |
| Meas[20]                | Active   |
| Motion correction       | Off      |
| Spatial filter          | Off      |
| Measurements            | 297      |
| Delay in TR             | 0 ms     |
| Multiple series         | Off      |

**Sequence - Part 1**

|                   |             |
|-------------------|-------------|
| Introduction      | Off         |
| Contrasts         | 1           |
| Flow comp.        | No          |
| Multi-slice mode  | Interleaved |
| Free echo spacing | Off         |
| Echo spacing      | 0.64 ms     |
| Bandwidth         | 1924 Hz/Px  |

**Sequence - Part 2**

|               |        |
|---------------|--------|
| EPI factor    | 130    |
| Gradient mode | Normal |
| RF spoiling   | Off    |

**Sequence - Special**

|                          |           |
|--------------------------|-----------|
| Excite pulse duration    | 5760 us   |
| Single-band images       | On        |
| MB LeakBlock kernel      | Off       |
| MB dual kernel           | Off       |
| MB RF phase scramble     | On        |
| SENSE1 coil combine      | Off       |
| Invert RO/PE polarity    | Off       |
| PF omits higher k-space  | Off       |
| Disable freq. update     | Off       |
| Force equal slice timing | Off       |
| Online multi-band recon. | Online    |
| FFT scale factor         | 0.60      |
| Fat saturation FA        | 110.0 deg |
| GRE iPAT ref. FA         | 12.0 deg  |
| Physio recording         | Off       |
| Triggering scheme        | Standard  |

\\USER\PHCP\functional\final\BOLD\_CSS\_task2\_AP

TA: 6:16 PM: FIX Voxel size: 1.6×1.6×1.6 mmPAT: 2 Rel. SNR: 1.00 : epfid

**Properties**

|                                               |                    |
|-----------------------------------------------|--------------------|
| Prio recon                                    | Off                |
| Load images to viewer                         | Off                |
| Inline movie                                  | Off                |
| Auto store images                             | On                 |
| Load images to stamp segments                 | Off                |
| Load images to graphic segments               | Off                |
| Auto open inline display                      | On                 |
| Auto close inline display                     | Off                |
| Start measurement without further preparation | Off                |
| Wait for user to start                        | On                 |
| Start measurements                            | Single measurement |

**Routine**

|                          |                    |
|--------------------------|--------------------|
| Slice group              | 1                  |
| Slices                   | 85                 |
| Dist. factor             | 0 %                |
| Position                 | L0.0 P13.6 H7.5 mm |
| Orientation              | T > C-20.0         |
| Phase enc. dir.          | A >> P             |
| AutoAlign                | Head > Brain       |
| Phase oversampling       | 0 %                |
| FoV read                 | 208 mm             |
| FoV phase                | 100.0 %            |
| Slice thickness          | 1.60 mm            |
| TR                       | 1000 ms            |
| TE                       | 22.20 ms           |
| Multi-band accel. factor | 5                  |
| Filter                   | None               |
| Coil elements            | A32                |

**Contrast - Common**

|                   |          |
|-------------------|----------|
| TR                | 1000 ms  |
| TE                | 22.20 ms |
| MTC               | Off      |
| Magn. preparation | None     |
| Flip angle        | 45 deg   |
| Fat suppr.        | Fat sat. |

**Contrast - Dynamic**

|                 |           |
|-----------------|-----------|
| Averaging mode  | Long term |
| Reconstruction  | Magnitude |
| Measurements    | 297       |
| Delay in TR     | 0 ms      |
| Multiple series | Off       |

**Resolution - Common**

|                       |         |
|-----------------------|---------|
| FoV read              | 208 mm  |
| FoV phase             | 100.0 % |
| Slice thickness       | 1.60 mm |
| Base resolution       | 130     |
| Phase resolution      | 100 %   |
| Phase partial Fourier | 7/8     |
| Interpolation         | Off     |

**Resolution - iPAT**

|                     |        |
|---------------------|--------|
| PAT mode            | GRAPPA |
| Accel. factor PE    | 2      |
| Ref. lines PE       | 96     |
| Reference scan mode | GRE    |

**Resolution - Filter Image**

|                   |     |
|-------------------|-----|
| Distortion Corr.  | Off |
| Prescan Normalize | Off |

**Resolution - Filter Rawdata**

|                   |     |
|-------------------|-----|
| Raw filter        | Off |
| Elliptical filter | Off |
| Hamming           | Off |

**Geometry - Common**

|                          |                    |
|--------------------------|--------------------|
| Slice group              | 1                  |
| Slices                   | 85                 |
| Dist. factor             | 0 %                |
| Position                 | L0.0 P13.6 H7.5 mm |
| Orientation              | T > C-20.0         |
| Phase enc. dir.          | A >> P             |
| FoV read                 | 208 mm             |
| FoV phase                | 100.0 %            |
| Slice thickness          | 1.60 mm            |
| TR                       | 1000 ms            |
| Multi-slice mode         | Interleaved        |
| Series                   | Interleaved        |
| Multi-band accel. factor | 5                  |

**Geometry - AutoAlign**

|                     |                    |
|---------------------|--------------------|
| Slice group         | 1                  |
| Position            | L0.0 P13.6 H7.5 mm |
| Orientation         | T > C-20.0         |
| Phase enc. dir.     | A >> P             |
| AutoAlign           | Head > Brain       |
| Initial Position    | L0.0 P13.6 H7.5    |
| L                   | 0.0 mm             |
| P                   | 13.6 mm            |
| H                   | 7.5 mm             |
| Initial Rotation    | -0.52 deg          |
| Initial Orientation | T > C              |
| T > C               | -20.0              |
| > S                 | 0.0                |

**Geometry - Saturation**

|              |          |
|--------------|----------|
| Fat suppr.   | Fat sat. |
| Special sat. | None     |

**Geometry - Tim Planning Suite**

|                   |      |
|-------------------|------|
| Set-n-Go Protocol | Off  |
| Table position    | H    |
| Table position    | 0 mm |
| Inline Composing  | Off  |

**System - Miscellaneous**

|                     |                      |
|---------------------|----------------------|
| Positioning mode    | FIX                  |
| Table position      | H                    |
| Table position      | 0 mm                 |
| MSMA                | S - C - T            |
| Sagittal            | R >> L               |
| Coronal             | A >> P               |
| Transversal         | F >> H               |
| Coil Combine Mode   | Sum of Squares       |
| Matrix Optimization | Off                  |
| AutoAlign           | Head > Brain         |
| Coil Select Mode    | Off - AutoCoilSelect |



**System - Adjustments**

|                          |          |
|--------------------------|----------|
| B0 Shim mode             | Advanced |
| B1 Shim mode             | TrueForm |
| Confirm freq. adjustment | Off      |
| Assume Dominant Fat      | Off      |
| Assume Silicone          | Off      |
| Adjustment Tolerance     | Auto     |

**System - Adjust Volume**

|               |                    |
|---------------|--------------------|
| ! Position    | L0.7 P13.2 H9.5 mm |
| ! Orientation | T > C-15.6 > S0.3  |
| ! Rotation    | 0.00 deg           |
| ! A >> P      | 170 mm             |
| ! R >> L      | 130 mm             |
| ! F >> H      | 120 mm             |
| Reset         | Off                |

**System - Tx/Rx**

|                     |                |
|---------------------|----------------|
| Frequency 1H        | 297.207726 MHz |
| Correction factor   | 1              |
| Gain                | High           |
| Img. Scale Cor.     | 1.000          |
| Reset               | Off            |
| ? Ref. amplitude 1H | 0.000 V        |

**Physio - Signal1**

|                          |         |
|--------------------------|---------|
| 1st Signal/Mode          | None    |
| TR                       | 1000 ms |
| Multi-band accel. factor | 5       |

**BOLD**

|                         |          |
|-------------------------|----------|
| GLM Statistics          | Off      |
| Dynamic t-maps          | Off      |
| Ignore meas. at start   | 0        |
| Ignore after transition | 0        |
| Model transition states | On       |
| Temp. highpass filter   | On       |
| Threshold               | 4.00     |
| Paradigm size           | 20       |
| Meas[1]                 | Baseline |
| Meas[2]                 | Baseline |
| Meas[3]                 | Baseline |
| Meas[4]                 | Baseline |
| Meas[5]                 | Baseline |
| Meas[6]                 | Baseline |
| Meas[7]                 | Baseline |
| Meas[8]                 | Baseline |
| Meas[9]                 | Baseline |
| Meas[10]                | Baseline |
| Meas[11]                | Active   |
| Meas[12]                | Active   |
| Meas[13]                | Active   |
| Meas[14]                | Active   |
| Meas[15]                | Active   |
| Meas[16]                | Active   |
| Meas[17]                | Active   |
| Meas[18]                | Active   |
| Meas[19]                | Active   |
| Meas[20]                | Active   |
| Motion correction       | Off      |
| Spatial filter          | Off      |
| Measurements            | 297      |
| Delay in TR             | 0 ms     |
| Multiple series         | Off      |

**Sequence - Part 1**

|                   |             |
|-------------------|-------------|
| Introduction      | Off         |
| Contrasts         | 1           |
| Flow comp.        | No          |
| Multi-slice mode  | Interleaved |
| Free echo spacing | Off         |
| Echo spacing      | 0.64 ms     |
| Bandwidth         | 1924 Hz/Px  |

**Sequence - Part 2**

|               |        |
|---------------|--------|
| EPI factor    | 130    |
| Gradient mode | Normal |
| RF spoiling   | Off    |

**Sequence - Special**

|                          |           |
|--------------------------|-----------|
| Excite pulse duration    | 5760 us   |
| Single-band images       | On        |
| MB LeakBlock kernel      | Off       |
| MB dual kernel           | Off       |
| MB RF phase scramble     | On        |
| SENSE1 coil combine      | Off       |
| Invert RO/PE polarity    | Off       |
| PF omits higher k-space  | Off       |
| Disable freq. update     | Off       |
| Force equal slice timing | Off       |
| Online multi-band recon. | Online    |
| FFT scale factor         | 0.60      |
| Fat saturation FA        | 110.0 deg |
| GRE iPAT ref. FA         | 12.0 deg  |
| Physio recording         | Off       |
| Triggering scheme        | Standard  |

\\USER\PHCP\functional\final\BOLD\_CSS\_task3\_AP

TA: 6:16 PM: FIX Voxel size: 1.6×1.6×1.6 mmPAT: 2 Rel. SNR: 1.00 : epfid

**Properties**

|                                               |                    |
|-----------------------------------------------|--------------------|
| Prio recon                                    | Off                |
| Load images to viewer                         | Off                |
| Inline movie                                  | Off                |
| Auto store images                             | On                 |
| Load images to stamp segments                 | Off                |
| Load images to graphic segments               | Off                |
| Auto open inline display                      | On                 |
| Auto close inline display                     | Off                |
| Start measurement without further preparation | Off                |
| Wait for user to start                        | On                 |
| Start measurements                            | Single measurement |

**Routine**

|                          |                    |
|--------------------------|--------------------|
| Slice group              | 1                  |
| Slices                   | 85                 |
| Dist. factor             | 0 %                |
| Position                 | L0.0 P13.6 H7.5 mm |
| Orientation              | T > C-20.0         |
| Phase enc. dir.          | A >> P             |
| AutoAlign                | Head > Brain       |
| Phase oversampling       | 0 %                |
| FoV read                 | 208 mm             |
| FoV phase                | 100.0 %            |
| Slice thickness          | 1.60 mm            |
| TR                       | 1000 ms            |
| TE                       | 22.20 ms           |
| Multi-band accel. factor | 5                  |
| Filter                   | None               |
| Coil elements            | A32                |

**Contrast - Common**

|                   |          |
|-------------------|----------|
| TR                | 1000 ms  |
| TE                | 22.20 ms |
| MTC               | Off      |
| Magn. preparation | None     |
| Flip angle        | 45 deg   |
| Fat suppr.        | Fat sat. |

**Contrast - Dynamic**

|                 |           |
|-----------------|-----------|
| Averaging mode  | Long term |
| Reconstruction  | Magnitude |
| Measurements    | 297       |
| Delay in TR     | 0 ms      |
| Multiple series | Off       |

**Resolution - Common**

|                       |         |
|-----------------------|---------|
| FoV read              | 208 mm  |
| FoV phase             | 100.0 % |
| Slice thickness       | 1.60 mm |
| Base resolution       | 130     |
| Phase resolution      | 100 %   |
| Phase partial Fourier | 7/8     |
| Interpolation         | Off     |

**Resolution - iPAT**

|                     |        |
|---------------------|--------|
| PAT mode            | GRAPPA |
| Accel. factor PE    | 2      |
| Ref. lines PE       | 96     |
| Reference scan mode | GRE    |

**Resolution - Filter Image**

|                   |     |
|-------------------|-----|
| Distortion Corr.  | Off |
| Prescan Normalize | Off |

**Resolution - Filter Rawdata**

|                   |     |
|-------------------|-----|
| Raw filter        | Off |
| Elliptical filter | Off |
| Hamming           | Off |

**Geometry - Common**

|                          |                    |
|--------------------------|--------------------|
| Slice group              | 1                  |
| Slices                   | 85                 |
| Dist. factor             | 0 %                |
| Position                 | L0.0 P13.6 H7.5 mm |
| Orientation              | T > C-20.0         |
| Phase enc. dir.          | A >> P             |
| FoV read                 | 208 mm             |
| FoV phase                | 100.0 %            |
| Slice thickness          | 1.60 mm            |
| TR                       | 1000 ms            |
| Multi-slice mode         | Interleaved        |
| Series                   | Interleaved        |
| Multi-band accel. factor | 5                  |

**Geometry - AutoAlign**

|                     |                    |
|---------------------|--------------------|
| Slice group         | 1                  |
| Position            | L0.0 P13.6 H7.5 mm |
| Orientation         | T > C-20.0         |
| Phase enc. dir.     | A >> P             |
| AutoAlign           | Head > Brain       |
| Initial Position    | L0.0 P13.6 H7.5    |
| L                   | 0.0 mm             |
| P                   | 13.6 mm            |
| H                   | 7.5 mm             |
| Initial Rotation    | -0.52 deg          |
| Initial Orientation | T > C              |
| T > C               | -20.0              |
| > S                 | 0.0                |

**Geometry - Saturation**

|              |          |
|--------------|----------|
| Fat suppr.   | Fat sat. |
| Special sat. | None     |

**Geometry - Tim Planning Suite**

|                   |      |
|-------------------|------|
| Set-n-Go Protocol | Off  |
| Table position    | H    |
| Table position    | 0 mm |
| Inline Composing  | Off  |

**System - Miscellaneous**

|                     |                      |
|---------------------|----------------------|
| Positioning mode    | FIX                  |
| Table position      | H                    |
| Table position      | 0 mm                 |
| MSMA                | S - C - T            |
| Sagittal            | R >> L               |
| Coronal             | A >> P               |
| Transversal         | F >> H               |
| Coil Combine Mode   | Sum of Squares       |
| Matrix Optimization | Off                  |
| AutoAlign           | Head > Brain         |
| Coil Select Mode    | Off - AutoCoilSelect |

**System - Adjustments**

|                          |          |
|--------------------------|----------|
| B0 Shim mode             | Advanced |
| B1 Shim mode             | TrueForm |
| Confirm freq. adjustment | Off      |
| Assume Dominant Fat      | Off      |
| Assume Silicone          | Off      |
| Adjustment Tolerance     | Auto     |

**System - Adjust Volume**

|               |                    |
|---------------|--------------------|
| ! Position    | L0.7 P13.2 H9.5 mm |
| ! Orientation | T > C-15.6 > S0.3  |
| ! Rotation    | 0.00 deg           |
| ! A >> P      | 170 mm             |
| ! R >> L      | 130 mm             |
| ! F >> H      | 120 mm             |
| Reset         | Off                |

**System - Tx/Rx**

|                     |                |
|---------------------|----------------|
| Frequency 1H        | 297.207726 MHz |
| Correction factor   | 1              |
| Gain                | High           |
| Img. Scale Cor.     | 1.000          |
| Reset               | Off            |
| ? Ref. amplitude 1H | 0.000 V        |

**Physio - Signal1**

|                          |         |
|--------------------------|---------|
| 1st Signal/Mode          | None    |
| TR                       | 1000 ms |
| Multi-band accel. factor | 5       |

**BOLD**

|                         |          |
|-------------------------|----------|
| GLM Statistics          | Off      |
| Dynamic t-maps          | Off      |
| Ignore meas. at start   | 0        |
| Ignore after transition | 0        |
| Model transition states | On       |
| Temp. highpass filter   | On       |
| Threshold               | 4.00     |
| Paradigm size           | 20       |
| Meas[1]                 | Baseline |
| Meas[2]                 | Baseline |
| Meas[3]                 | Baseline |
| Meas[4]                 | Baseline |
| Meas[5]                 | Baseline |
| Meas[6]                 | Baseline |
| Meas[7]                 | Baseline |
| Meas[8]                 | Baseline |
| Meas[9]                 | Baseline |
| Meas[10]                | Baseline |
| Meas[11]                | Active   |
| Meas[12]                | Active   |
| Meas[13]                | Active   |
| Meas[14]                | Active   |
| Meas[15]                | Active   |
| Meas[16]                | Active   |
| Meas[17]                | Active   |
| Meas[18]                | Active   |
| Meas[19]                | Active   |
| Meas[20]                | Active   |
| Motion correction       | Off      |
| Spatial filter          | Off      |
| Measurements            | 297      |
| Delay in TR             | 0 ms     |
| Multiple series         | Off      |

**Sequence - Part 1**

|                   |             |
|-------------------|-------------|
| Introduction      | Off         |
| Contrasts         | 1           |
| Flow comp.        | No          |
| Multi-slice mode  | Interleaved |
| Free echo spacing | Off         |
| Echo spacing      | 0.64 ms     |
| Bandwidth         | 1924 Hz/Px  |

**Sequence - Part 2**

|               |        |
|---------------|--------|
| EPI factor    | 130    |
| Gradient mode | Normal |
| RF spoiling   | Off    |

**Sequence - Special**

|                          |           |
|--------------------------|-----------|
| Excite pulse duration    | 5760 us   |
| Single-band images       | On        |
| MB LeakBlock kernel      | Off       |
| MB dual kernel           | Off       |
| MB RF phase scramble     | On        |
| SENSE1 coil combine      | Off       |
| Invert RO/PE polarity    | Off       |
| PF omits higher k-space  | Off       |
| Disable freq. update     | Off       |
| Force equal slice timing | Off       |
| Online multi-band recon. | Online    |
| FFT scale factor         | 0.60      |
| Fat saturation FA        | 110.0 deg |
| GRE iPAT ref. FA         | 12.0 deg  |
| Physio recording         | Off       |
| Triggering scheme        | Standard  |

## \\USER\PHCP\functional\final\FieldMap

TA: 2:14 PM: FIX Voxel size: 2.2x2.2x3.0 mmRel. SNR: 1.00 : fm\_r

**Properties**

|                                               |                    |
|-----------------------------------------------|--------------------|
| Prio recon                                    | Off                |
| Load images to viewer                         | Off                |
| Inline movie                                  | Off                |
| Auto store images                             | On                 |
| Load images to stamp segments                 | Off                |
| Load images to graphic segments               | Off                |
| Auto open inline display                      | Off                |
| Auto close inline display                     | Off                |
| Start measurement without further preparation | Off                |
| Wait for user to start                        | Off                |
| Start measurements                            | Single measurement |

**Routine**

|                    |                    |
|--------------------|--------------------|
| Slice group        | 1                  |
| Slices             | 85                 |
| Dist. factor       | 0 %                |
| Position           | L0.0 P13.6 H7.5 mm |
| Orientation        | T > C-20.0         |
| Phase enc. dir.    | A >> P             |
| AutoAlign          | Head > Brain       |
| Phase oversampling | 0 %                |
| FoV read           | 280 mm             |
| FoV phase          | 100.0 %            |
| Slice thickness    | 3.0 mm             |
| TR                 | 668.0 ms           |
| TE 1               | 4.08 ms            |
| TE 2               | 5.1 ms             |
| Averages           | 1                  |
| Concatenations     | 1                  |
| Filter             | None               |
| Coil elements      | A32                |

**Contrast - Common**

|            |          |
|------------|----------|
| TR         | 668.0 ms |
| TE 1       | 4.08 ms  |
| TE 2       | 5.1 ms   |
| MTC        | Off      |
| Flip angle | 32 deg   |
| Fat suppr. | None     |

**Contrast - Dynamic**

|                 |             |
|-----------------|-------------|
| Averages        | 1           |
| Averaging mode  | Short term  |
| Reconstruction  | Magn./Phase |
| Measurements    | 1           |
| Multiple series | Off         |

**Resolution - Common**

|                       |         |
|-----------------------|---------|
| FoV read              | 280 mm  |
| FoV phase             | 100.0 % |
| Slice thickness       | 3.0 mm  |
| Base resolution       | 130     |
| Phase resolution      | 100 %   |
| Phase partial Fourier | 6/8     |
| Interpolation         | Off     |

**Resolution - Filter Image**

|                  |     |
|------------------|-----|
| Image Filter     | Off |
| Distortion Corr. | Off |

**Resolution - Filter Image**

|                   |     |
|-------------------|-----|
| Prescan Normalize | Off |
| Normalize         | Off |
| B1 filter         | Off |

**Resolution - Filter Rawdata**

|                   |     |
|-------------------|-----|
| Raw filter        | Off |
| Elliptical filter | Off |

**Geometry - Common**

|                  |                    |
|------------------|--------------------|
| Slice group      | 1                  |
| Slices           | 85                 |
| Dist. factor     | 0 %                |
| Position         | L0.0 P13.6 H7.5 mm |
| Orientation      | T > C-20.0         |
| Phase enc. dir.  | A >> P             |
| FoV read         | 280 mm             |
| FoV phase        | 100.0 %            |
| Slice thickness  | 3.0 mm             |
| TR               | 668.0 ms           |
| Multi-slice mode | Interleaved        |
| Series           | Interleaved        |
| Concatenations   | 1                  |

**Geometry - AutoAlign**

|                     |                    |
|---------------------|--------------------|
| Slice group         | 1                  |
| Position            | L0.0 P13.6 H7.5 mm |
| Orientation         | T > C-20.0         |
| Phase enc. dir.     | A >> P             |
| AutoAlign           | Head > Brain       |
| Initial Position    | L0.0 P13.6 H7.5    |
| L                   | 0.0 mm             |
| P                   | 13.6 mm            |
| H                   | 7.5 mm             |
| Initial Rotation    | 0.00 deg           |
| Initial Orientation | T > C              |
| T > C               | -20.0              |
| > S                 | 0.0                |

**Geometry - Saturation**

|              |      |
|--------------|------|
| Fat suppr.   | None |
| Special sat. | None |

**Geometry - Tim Planning Suite**

|                   |      |
|-------------------|------|
| Set-n-Go Protocol | Off  |
| Table position    | H    |
| Table position    | 0 mm |
| Inline Composing  | Off  |

**System - Miscellaneous**

|                     |                  |
|---------------------|------------------|
| Positioning mode    | FIX              |
| Table position      | H                |
| Table position      | 0 mm             |
| MSMA                | S - C - T        |
| Sagittal            | R >> L           |
| Coronal             | A >> P           |
| Transversal         | F >> H           |
| Coil Combine Mode   | Adaptive Combine |
| Save uncombined     | Off              |
| Matrix Optimization | Off              |
| AutoAlign           | Head > Brain     |

**System - Miscellaneous**

|                  |                      |
|------------------|----------------------|
| Coil Select Mode | Off - AutoCoilSelect |
|------------------|----------------------|

**System - Adjustments**

|                          |          |
|--------------------------|----------|
| B0 Shim mode             | Advanced |
| B1 Shim mode             | TrueForm |
| Confirm freq. adjustment | Off      |
| Assume Dominant Fat      | Off      |
| Assume Silicone          | Off      |
| Adjustment Tolerance     | Auto     |

**System - Adjust Volume**

|               |                    |
|---------------|--------------------|
| ! Position    | L0.7 P13.2 H9.5 mm |
| ! Orientation | T > C-15.6 > S0.3  |
| ! Rotation    | 0.00 deg           |
| ! A >> P      | 170 mm             |
| ! R >> L      | 130 mm             |
| ! F >> H      | 120 mm             |
| Reset         | Off                |

**System - Tx/Rx**

|                     |                |
|---------------------|----------------|
| Frequency 1H        | 297.207726 MHz |
| Correction factor   | 1              |
| Gain                | High           |
| Img. Scale Cor.     | 1.000          |
| Reset               | Off            |
| ? Ref. amplitude 1H | 0.000 V        |

**Sequence - Part 1**

|                  |             |
|------------------|-------------|
| Introduction     | On          |
| Dimension        | 2D          |
| Asymmetric echo  | Off         |
| Contrasts        | 2           |
| Flow comp.       | Yes         |
| Multi-slice mode | Interleaved |
| Bandwidth        | 401 Hz/Px   |

**Sequence - Part 2**

|               |        |
|---------------|--------|
| RF pulse type | Normal |
| Gradient mode | Fast   |
| RF spoiling   | On     |

**Sequence - Assistant**

|      |     |
|------|-----|
| Mode | Off |
|------|-----|

\\USER\PHCP\functional\final\t1\_mpr\_tra\_iso

TA: 4:17 PM: FIX Voxel size: 1.0×1.0×1.0 mmPAT: 3 Rel. SNR: 1.00 : tfl

**Properties**

|                                               |                    |
|-----------------------------------------------|--------------------|
| Prio recon                                    | Off                |
| Load images to viewer                         | On                 |
| Inline movie                                  | Off                |
| Auto store images                             | On                 |
| Load images to stamp segments                 | Off                |
| Load images to graphic segments               | Off                |
| Auto open inline display                      | Off                |
| Auto close inline display                     | Off                |
| Start measurement without further preparation | Off                |
| Wait for user to start                        | Off                |
| Start measurements                            | Single measurement |

**Routine**

|                    |                      |
|--------------------|----------------------|
| Slab group         | 1                    |
| Slabs              | 1                    |
| Dist. factor       | 50 %                 |
| Position           | Isocenter            |
| Orientation        | Sagittal             |
| Phase enc. dir.    | A >> P               |
| AutoAlign          | Head > Brain         |
| Phase oversampling | 0 %                  |
| Slice oversampling | 0.0 %                |
| Slices per slab    | 176                  |
| FoV read           | 256 mm               |
| FoV phase          | 100.0 %              |
| Slice thickness    | 1.00 mm              |
| TR                 | 3000.0 ms            |
| TE                 | 3.27 ms              |
| Averages           | 1                    |
| Concatenations     | 1                    |
| Filter             | Distortion Corr.(3D) |
| Coil elements      | A32                  |

**Contrast - Common**

|                   |             |
|-------------------|-------------|
| TR                | 3000.0 ms   |
| TE                | 3.27 ms     |
| Magn. preparation | Non-sel. IR |
| TI                | 1500 ms     |
| Flip angle        | 5.0 deg     |
| Fat suppr.        | None        |
| Water suppr.      | None        |

**Contrast - Dynamic**

|                 |                  |
|-----------------|------------------|
| Averages        | 1                |
| Averaging mode  | Long term        |
| Reconstruction  | Magnitude        |
| Measurements    | 1                |
| Multiple series | Each measurement |

**Resolution - Common**

|                       |         |
|-----------------------|---------|
| FoV read              | 256 mm  |
| FoV phase             | 100.0 % |
| Slice thickness       | 1.00 mm |
| Base resolution       | 256     |
| Phase resolution      | 100 %   |
| Slice resolution      | 100 %   |
| Phase partial Fourier | 6/8     |
| Slice partial Fourier | Off     |
| Interpolation         | Off     |

**Resolution - iPAT**

|                     |            |
|---------------------|------------|
| PAT mode            | GRAPPA     |
| Accel. factor PE    | 3          |
| Ref. lines PE       | 32         |
| Accel. factor 3D    | 1          |
| Reference scan mode | Integrated |

**Resolution - Filter Image**

|                   |     |
|-------------------|-----|
| Image Filter      | Off |
| Distortion Corr.  | On  |
| Mode              | 3D  |
| Unfiltered images | On  |
| Prescan Normalize | Off |
| Normalize         | Off |
| B1 filter         | Off |

**Resolution - Filter Rawdata**

|                   |     |
|-------------------|-----|
| Raw filter        | Off |
| Elliptical filter | Off |

**Geometry - Common**

|                    |             |
|--------------------|-------------|
| Slab group         | 1           |
| Slabs              | 1           |
| Dist. factor       | 50 %        |
| Position           | Isocenter   |
| Orientation        | Sagittal    |
| Phase enc. dir.    | A >> P      |
| Slice oversampling | 0.0 %       |
| Slices per slab    | 176         |
| FoV read           | 256 mm      |
| FoV phase          | 100.0 %     |
| Slice thickness    | 1.00 mm     |
| TR                 | 3000.0 ms   |
| Multi-slice mode   | Single shot |
| Series             | Ascending   |
| Concatenations     | 1           |

**Geometry - AutoAlign**

|                     |              |
|---------------------|--------------|
| Slab group          | 1            |
| Position            | Isocenter    |
| Orientation         | Sagittal     |
| Phase enc. dir.     | A >> P       |
| AutoAlign           | Head > Brain |
| Initial Position    | Isocenter    |
| L                   | 0.0 mm       |
| P                   | 0.0 mm       |
| H                   | 0.0 mm       |
| Initial Rotation    | 0.00 deg     |
| Initial Orientation | Sagittal     |

**Geometry - Navigator****Geometry - Tim Planning Suite**

|                   |      |
|-------------------|------|
| Set-n-Go Protocol | Off  |
| Table position    | H    |
| Table position    | 0 mm |
| Inline Composing  | Off  |

**System - Miscellaneous**

|                  |     |
|------------------|-----|
| Positioning mode | FIX |
| Table position   | H   |

**System - Miscellaneous**

|                     |                      |
|---------------------|----------------------|
| Table position      | 0 mm                 |
| MSMA                | S - C - T            |
| Sagittal            | R >> L               |
| Coronal             | A >> P               |
| Transversal         | F >> H               |
| Coil Combine Mode   | Adaptive Combine     |
| Save uncombined     | Off                  |
| Matrix Optimization | Off                  |
| AutoAlign           | Head > Brain         |
| Coil Select Mode    | Off - AutoCoilSelect |

**System - Adjustments**

|                          |          |
|--------------------------|----------|
| B0 Shim mode             | Tune up  |
| B1 Shim mode             | TrueForm |
| Confirm freq. adjustment | Off      |
| Assume Dominant Fat      | Off      |
| Assume Silicone          | Off      |
| Adjustment Tolerance     | Auto     |

**System - Adjust Volume**

|               |                     |
|---------------|---------------------|
| ! Position    | L0.6 P15.0 H19.2 mm |
| ! Orientation | T > C-15.5          |
| ! Rotation    | 0.00 deg            |
| ! A >> P      | 107 mm              |
| ! R >> L      | 104 mm              |
| ! F >> H      | 65 mm               |
| Reset         | Off                 |

**System - Tx/Rx**

|                     |                |
|---------------------|----------------|
| Frequency 1H        | 297.207726 MHz |
| Correction factor   | 1              |
| Gain                | High           |
| Img. Scale Cor.     | 1.000          |
| Reset               | Off            |
| ? Ref. amplitude 1H | 0.000 V        |

**Physio - Signal1**

|                 |           |
|-----------------|-----------|
| 1st Signal/Mode | None      |
| TR              | 3000.0 ms |
| Concatenations  | 1         |

**Physio - Cardiac**

|                   |             |
|-------------------|-------------|
| Magn. preparation | Non-sel. IR |
| TI                | 1500 ms     |
| Fat suppr.        | None        |
| Dark blood        | Off         |
| FoV read          | 256 mm      |
| FoV phase         | 100.0 %     |
| Phase resolution  | 100 %       |

**Physio - PACE**

|                |     |
|----------------|-----|
| Resp. control  | Off |
| Concatenations | 1   |

**Inline - Common**

|                      |     |
|----------------------|-----|
| Subtract             | Off |
| Measurements         | 1   |
| StdDev               | Off |
| Save original images | On  |

**Inline - MIP**

|         |     |
|---------|-----|
| MIP-Sag | Off |
| MIP-Cor | Off |

**Inline - MIP**

|                      |     |
|----------------------|-----|
| MIP-Tra              | Off |
| MIP-Time             | Off |
| Save original images | On  |

**Inline - Composing**

|                   |     |
|-------------------|-----|
| Inline Composing  | Off |
| Distortion Corr.  | On  |
| Mode              | 3D  |
| Unfiltered images | On  |

**Inline - MapIt**

|                      |           |
|----------------------|-----------|
| Save original images | On        |
| MapIt                | None      |
| Flip angle           | 5.0 deg   |
| Measurements         | 1         |
| TR                   | 3000.0 ms |
| TE                   | 3.27 ms   |

**Sequence - Part 1**

|                     |             |
|---------------------|-------------|
| Introduction        | On          |
| Dimension           | 3D          |
| Elliptical scanning | Off         |
| Reordering          | Linear      |
| Asymmetric echo     | Allowed     |
| Flow comp.          | No          |
| Multi-slice mode    | Single shot |
| Echo spacing        | 8.1 ms      |
| Bandwidth           | 180 Hz/Px   |

**Sequence - Part 2**

|                         |           |
|-------------------------|-----------|
| RF pulse type           | Normal    |
| Gradient mode           | Normal    |
| Excitation              | Slab-sel. |
| RF spoiling             | On        |
| Incr. Gradient spoiling | Off       |
| Turbo factor            | 176       |

**Sequence - Nuclei**

|                       |      |
|-----------------------|------|
| TX/RX Nucleus         | 1H   |
| TX/RX delta frequency | 0 Hz |
| TX Nucleus            | None |
| TX delta frequency    | 0 Hz |
| Coil elements         | A32  |

**Sequence - Assistant**

|      |     |
|------|-----|
| Mode | Off |
|------|-----|

\\USER\PHCP\functional\final\BOLD\_AP\_SE

TA: 1:31 PM: FIX Voxel size: 1.6×1.6×1.6 mmPAT: 2 Rel. SNR: 1.00 : epse

**Properties**

|                                               |                    |
|-----------------------------------------------|--------------------|
| Prio recon                                    | Off                |
| Load images to viewer                         | On                 |
| Inline movie                                  | Off                |
| Auto store images                             | On                 |
| Load images to stamp segments                 | Off                |
| Load images to graphic segments               | Off                |
| Auto open inline display                      | Off                |
| Auto close inline display                     | Off                |
| Start measurement without further preparation | Off                |
| Wait for user to start                        | Off                |
| Start measurements                            | Single measurement |

**Routine**

|                          |                    |
|--------------------------|--------------------|
| Slice group              | 1                  |
| Slices                   | 85                 |
| Dist. factor             | 0 %                |
| Position                 | L0.0 P13.6 H7.5 mm |
| Orientation              | T > C-20.0         |
| Phase enc. dir.          | A >> P             |
| AutoAlign                | Head > Brain       |
| Phase oversampling       | 0 %                |
| FoV read                 | 208 mm             |
| FoV phase                | 100.0 %            |
| Slice thickness          | 1.60 mm            |
| TR                       | 3000 ms            |
| TE                       | 60.00 ms           |
| Multi-band accel. factor | 5                  |
| Filter                   | None               |
| Coil elements            | A32                |

**Contrast - Common**

|                       |          |
|-----------------------|----------|
| TR                    | 3000 ms  |
| TE                    | 60.00 ms |
| MTC                   | Off      |
| Magn. preparation     | None     |
| Flip angle            | 90 deg   |
| Refocus flip angle    | 180 deg  |
| Fat suppr.            | None     |
| Grad. rev. fat suppr. | Disabled |

**Contrast - Dynamic**

|                 |           |
|-----------------|-----------|
| Averaging mode  | Long term |
| Reconstruction  | Magnitude |
| Measurements    | 3         |
| Delay in TR     | 0 ms      |
| Multiple series | Off       |

**Resolution - Common**

|                       |         |
|-----------------------|---------|
| FoV read              | 208 mm  |
| FoV phase             | 100.0 % |
| Slice thickness       | 1.60 mm |
| Base resolution       | 130     |
| Phase resolution      | 100 %   |
| Phase partial Fourier | 7/8     |
| Interpolation         | Off     |

**Resolution - iPAT**

|                  |        |
|------------------|--------|
| PAT mode         | GRAPPA |
| Accel. factor PE | 2      |

**Resolution - iPAT**

|                     |     |
|---------------------|-----|
| Ref. lines PE       | 96  |
| Reference scan mode | GRE |

**Resolution - Filter Image**

|                   |     |
|-------------------|-----|
| Distortion Corr.  | Off |
| Prescan Normalize | Off |

**Resolution - Filter Rawdata**

|                   |     |
|-------------------|-----|
| Raw filter        | Off |
| Elliptical filter | Off |
| Hamming           | Off |

**Geometry - Common**

|                          |                    |
|--------------------------|--------------------|
| Slice group              | 1                  |
| Slices                   | 85                 |
| Dist. factor             | 0 %                |
| Position                 | L0.0 P13.6 H7.5 mm |
| Orientation              | T > C-20.0         |
| Phase enc. dir.          | A >> P             |
| FoV read                 | 208 mm             |
| FoV phase                | 100.0 %            |
| Slice thickness          | 1.60 mm            |
| TR                       | 3000 ms            |
| Multi-slice mode         | Interleaved        |
| Series                   | Interleaved        |
| Multi-band accel. factor | 5                  |

**Geometry - AutoAlign**

|                     |                    |
|---------------------|--------------------|
| Slice group         | 1                  |
| Position            | L0.0 P13.6 H7.5 mm |
| Orientation         | T > C-20.0         |
| Phase enc. dir.     | A >> P             |
| AutoAlign           | Head > Brain       |
| Initial Position    | L0.0 P13.6 H7.5    |
| L                   | 0.0 mm             |
| P                   | 13.6 mm            |
| H                   | 7.5 mm             |
| Initial Rotation    | -0.51 deg          |
| Initial Orientation | T > C              |
| T > C               | -20.0              |
| > S                 | 0.0                |

**Geometry - Saturation**

|                       |          |
|-----------------------|----------|
| Fat suppr.            | None     |
| Grad. rev. fat suppr. | Disabled |
| Special sat.          | None     |

**Geometry - Tim Planning Suite**

|                   |      |
|-------------------|------|
| Set-n-Go Protocol | Off  |
| Table position    | H    |
| Table position    | 0 mm |
| Inline Composing  | Off  |

**System - Miscellaneous**

|                  |           |
|------------------|-----------|
| Positioning mode | FIX       |
| Table position   | H         |
| Table position   | 0 mm      |
| MSMA             | S - C - T |
| Sagittal         | R >> L    |
| Coronal          | A >> P    |



**System - Miscellaneous**

|                     |                      |
|---------------------|----------------------|
| Transversal         | F >> H               |
| Coil Combine Mode   | Sum of Squares       |
| Matrix Optimization | Off                  |
| AutoAlign           | Head > Brain         |
| Coil Select Mode    | Off - AutoCoilSelect |

**System - Adjustments**

|                          |          |
|--------------------------|----------|
| B0 Shim mode             | Advanced |
| B1 Shim mode             | TrueForm |
| Confirm freq. adjustment | Off      |
| Assume Dominant Fat      | Off      |
| Assume Silicone          | Off      |
| Adjustment Tolerance     | Auto     |

**System - Adjust Volume**

|               |                    |
|---------------|--------------------|
| ! Position    | L0.7 P13.2 H9.5 mm |
| ! Orientation | T > C-15.6 > S0.3  |
| ! Rotation    | 0.00 deg           |
| ! A >> P      | 170 mm             |
| ! R >> L      | 130 mm             |
| ! F >> H      | 120 mm             |
| Reset         | Off                |

**System - Tx/Rx**

|                     |                |
|---------------------|----------------|
| Frequency 1H        | 297.207726 MHz |
| Correction factor   | 1              |
| Gain                | High           |
| Img. Scale Cor.     | 1.000          |
| Reset               | Off            |
| ? Ref. amplitude 1H | 0.000 V        |

**Physio - Signal1**

|                          |         |
|--------------------------|---------|
| 1st Signal/Mode          | None    |
| TR                       | 3000 ms |
| Multi-band accel. factor | 5       |

**BOLD**

|                         |          |
|-------------------------|----------|
| GLM Statistics          | Off      |
| Dynamic t-maps          | Off      |
| Ignore meas. at start   | 0        |
| Ignore after transition | 0        |
| Model transition states | On       |
| Temp. highpass filter   | On       |
| Threshold               | 4.00     |
| Paradigm size           | 20       |
| Meas[1]                 | Baseline |
| Meas[2]                 | Baseline |
| Meas[3]                 | Baseline |
| Meas[4]                 | Baseline |
| Meas[5]                 | Baseline |
| Meas[6]                 | Baseline |
| Meas[7]                 | Baseline |
| Meas[8]                 | Baseline |
| Meas[9]                 | Baseline |
| Meas[10]                | Baseline |
| Meas[11]                | Active   |
| Meas[12]                | Active   |
| Meas[13]                | Active   |
| Meas[14]                | Active   |
| Meas[15]                | Active   |
| Meas[16]                | Active   |
| Meas[17]                | Active   |
| Meas[18]                | Active   |
| Meas[19]                | Active   |

**BOLD**

|                   |        |
|-------------------|--------|
| Meas[20]          | Active |
| Motion correction | Off    |
| Spatial filter    | Off    |
| Measurements      | 3      |
| Delay in TR       | 0 ms   |
| Multiple series   | Off    |

**Sequence - Part 1**

|                   |             |
|-------------------|-------------|
| Introduction      | Off         |
| Contrasts         | 1           |
| Multi-slice mode  | Interleaved |
| Free echo spacing | Off         |
| Echo spacing      | 0.64 ms     |
| Bandwidth         | 1924 Hz/Px  |

**Sequence - Part 2**

|               |        |
|---------------|--------|
| EPI factor    | 130    |
| Gradient mode | Normal |

**Sequence - Special**

|                          |          |
|--------------------------|----------|
| Excite pulse duration    | 5120 us  |
| Refocus pulse duration   | 10240 us |
| Single-band images       | On       |
| MB LeakBlock kernel      | Off      |
| MB dual kernel           | Off      |
| MB RF phase scramble     | Off      |
| Time-shifted MB RF       | Off      |
| SENSE1 coil combine      | Off      |
| Invert RO/PE polarity    | Off      |
| PF omits higher k-space  | Off      |
| Disable freq. update     | Off      |
| Force equal slice timing | Off      |
| Online multi-band recon. | Online   |
| FFT scale factor         | 1.00     |
| GRE iPAT ref. FA         | 12.0 deg |
| Physio recording         | Off      |
| Triggering scheme        | Standard |

## \\USER\PHCP\functional\final\BOLD\_REV\_AP\_SE

TA: 1:31 PM: FIX Voxel size: 1.6×1.6×1.6 mmPAT: 2 Rel. SNR: 1.00 : epse

**Properties**

|                                               |                    |
|-----------------------------------------------|--------------------|
| Prio recon                                    | Off                |
| Load images to viewer                         | On                 |
| Inline movie                                  | Off                |
| Auto store images                             | On                 |
| Load images to stamp segments                 | Off                |
| Load images to graphic segments               | Off                |
| Auto open inline display                      | Off                |
| Auto close inline display                     | Off                |
| Start measurement without further preparation | Off                |
| Wait for user to start                        | Off                |
| Start measurements                            | Single measurement |

**Routine**

|                          |                    |
|--------------------------|--------------------|
| Slice group              | 1                  |
| Slices                   | 85                 |
| Dist. factor             | 0 %                |
| Position                 | L0.0 P13.6 H7.5 mm |
| Orientation              | T > C-20.0         |
| Phase enc. dir.          | A >> P             |
| AutoAlign                | Head > Brain       |
| Phase oversampling       | 0 %                |
| FoV read                 | 208 mm             |
| FoV phase                | 100.0 %            |
| Slice thickness          | 1.60 mm            |
| TR                       | 3000 ms            |
| TE                       | 60.00 ms           |
| Multi-band accel. factor | 5                  |
| Filter                   | None               |
| Coil elements            | A32                |

**Contrast - Common**

|                       |          |
|-----------------------|----------|
| TR                    | 3000 ms  |
| TE                    | 60.00 ms |
| MTC                   | Off      |
| Magn. preparation     | None     |
| Flip angle            | 90 deg   |
| Refocus flip angle    | 180 deg  |
| Fat suppr.            | None     |
| Grad. rev. fat suppr. | Disabled |

**Contrast - Dynamic**

|                 |           |
|-----------------|-----------|
| Averaging mode  | Long term |
| Reconstruction  | Magnitude |
| Measurements    | 3         |
| Delay in TR     | 0 ms      |
| Multiple series | Off       |

**Resolution - Common**

|                       |         |
|-----------------------|---------|
| FoV read              | 208 mm  |
| FoV phase             | 100.0 % |
| Slice thickness       | 1.60 mm |
| Base resolution       | 130     |
| Phase resolution      | 100 %   |
| Phase partial Fourier | 7/8     |
| Interpolation         | Off     |

**Resolution - iPAT**

|                  |        |
|------------------|--------|
| PAT mode         | GRAPPA |
| Accel. factor PE | 2      |

**Resolution - iPAT**

|                     |     |
|---------------------|-----|
| Ref. lines PE       | 96  |
| Reference scan mode | GRE |

**Resolution - Filter Image**

|                   |     |
|-------------------|-----|
| Distortion Corr.  | Off |
| Prescan Normalize | Off |

**Resolution - Filter Rawdata**

|                   |     |
|-------------------|-----|
| Raw filter        | Off |
| Elliptical filter | Off |
| Hamming           | Off |

**Geometry - Common**

|                          |                    |
|--------------------------|--------------------|
| Slice group              | 1                  |
| Slices                   | 85                 |
| Dist. factor             | 0 %                |
| Position                 | L0.0 P13.6 H7.5 mm |
| Orientation              | T > C-20.0         |
| Phase enc. dir.          | A >> P             |
| FoV read                 | 208 mm             |
| FoV phase                | 100.0 %            |
| Slice thickness          | 1.60 mm            |
| TR                       | 3000 ms            |
| Multi-slice mode         | Interleaved        |
| Series                   | Interleaved        |
| Multi-band accel. factor | 5                  |

**Geometry - AutoAlign**

|                     |                    |
|---------------------|--------------------|
| Slice group         | 1                  |
| Position            | L0.0 P13.6 H7.5 mm |
| Orientation         | T > C-20.0         |
| Phase enc. dir.     | A >> P             |
| AutoAlign           | Head > Brain       |
| Initial Position    | L0.0 P13.6 H7.5    |
| L                   | 0.0 mm             |
| P                   | 13.6 mm            |
| H                   | 7.5 mm             |
| Initial Rotation    | -0.51 deg          |
| Initial Orientation | T > C              |
| T > C               | -20.0              |
| > S                 | 0.0                |

**Geometry - Saturation**

|                       |          |
|-----------------------|----------|
| Fat suppr.            | None     |
| Grad. rev. fat suppr. | Disabled |
| Special sat.          | None     |

**Geometry - Tim Planning Suite**

|                   |      |
|-------------------|------|
| Set-n-Go Protocol | Off  |
| Table position    | H    |
| Table position    | 0 mm |
| Inline Composing  | Off  |

**System - Miscellaneous**

|                  |           |
|------------------|-----------|
| Positioning mode | FIX       |
| Table position   | H         |
| Table position   | 0 mm      |
| MSMA             | S - C - T |
| Sagittal         | R >> L    |
| Coronal          | A >> P    |

**System - Miscellaneous**

|                     |                      |
|---------------------|----------------------|
| Transversal         | F >> H               |
| Coil Combine Mode   | Sum of Squares       |
| Matrix Optimization | Off                  |
| AutoAlign           | Head > Brain         |
| Coil Select Mode    | Off - AutoCoilSelect |

**System - Adjustments**

|                          |          |
|--------------------------|----------|
| B0 Shim mode             | Advanced |
| B1 Shim mode             | TrueForm |
| Confirm freq. adjustment | Off      |
| Assume Dominant Fat      | Off      |
| Assume Silicone          | Off      |
| Adjustment Tolerance     | Auto     |

**System - Adjust Volume**

|               |                    |
|---------------|--------------------|
| ! Position    | L0.7 P13.2 H9.5 mm |
| ! Orientation | T > C-15.6 > S0.3  |
| ! Rotation    | 0.00 deg           |
| ! A >> P      | 170 mm             |
| ! R >> L      | 130 mm             |
| ! F >> H      | 120 mm             |
| Reset         | Off                |

**System - Tx/Rx**

|                     |                |
|---------------------|----------------|
| Frequency 1H        | 297.207726 MHz |
| Correction factor   | 1              |
| Gain                | High           |
| Img. Scale Cor.     | 1.000          |
| Reset               | Off            |
| ? Ref. amplitude 1H | 0.000 V        |

**Physio - Signal1**

|                          |         |
|--------------------------|---------|
| 1st Signal/Mode          | None    |
| TR                       | 3000 ms |
| Multi-band accel. factor | 5       |

**BOLD**

|                         |          |
|-------------------------|----------|
| GLM Statistics          | Off      |
| Dynamic t-maps          | Off      |
| Ignore meas. at start   | 0        |
| Ignore after transition | 0        |
| Model transition states | On       |
| Temp. highpass filter   | On       |
| Threshold               | 4.00     |
| Paradigm size           | 20       |
| Meas[1]                 | Baseline |
| Meas[2]                 | Baseline |
| Meas[3]                 | Baseline |
| Meas[4]                 | Baseline |
| Meas[5]                 | Baseline |
| Meas[6]                 | Baseline |
| Meas[7]                 | Baseline |
| Meas[8]                 | Baseline |
| Meas[9]                 | Baseline |
| Meas[10]                | Baseline |
| Meas[11]                | Active   |
| Meas[12]                | Active   |
| Meas[13]                | Active   |
| Meas[14]                | Active   |
| Meas[15]                | Active   |
| Meas[16]                | Active   |
| Meas[17]                | Active   |
| Meas[18]                | Active   |
| Meas[19]                | Active   |

**BOLD**

|                   |        |
|-------------------|--------|
| Meas[20]          | Active |
| Motion correction | Off    |
| Spatial filter    | Off    |
| Measurements      | 3      |
| Delay in TR       | 0 ms   |
| Multiple series   | Off    |

**Sequence - Part 1**

|                   |             |
|-------------------|-------------|
| Introduction      | Off         |
| Contrasts         | 1           |
| Multi-slice mode  | Interleaved |
| Free echo spacing | Off         |
| Echo spacing      | 0.64 ms     |
| Bandwidth         | 1924 Hz/Px  |

**Sequence - Part 2**

|               |        |
|---------------|--------|
| EPI factor    | 130    |
| Gradient mode | Normal |

**Sequence - Special**

|                          |          |
|--------------------------|----------|
| Excite pulse duration    | 5120 us  |
| Refocus pulse duration   | 10240 us |
| Single-band images       | On       |
| MB LeakBlock kernel      | Off      |
| MB dual kernel           | Off      |
| MB RF phase scramble     | Off      |
| Time-shifted MB RF       | Off      |
| SENSE1 coil combine      | Off      |
| Invert RO/PE polarity    | On       |
| PF omits higher k-space  | Off      |
| Disable freq. update     | Off      |
| Force equal slice timing | Off      |
| Online multi-band recon. | Online   |
| FFT scale factor         | 1.00     |
| GRE iPAT ref. FA         | 12.0 deg |
| Physio recording         | Off      |
| Triggering scheme        | Standard |

\\USER\PHCP\functional\final\BOLD\_COP\_task1\_AP

TA: 9:07 PM: FIX Voxel size: 1.6×1.6×1.6 mmPAT: 2 Rel. SNR: 1.00 : epfid

**Properties**

|                                               |                    |
|-----------------------------------------------|--------------------|
| Prio recon                                    | Off                |
| Load images to viewer                         | Off                |
| Inline movie                                  | Off                |
| Auto store images                             | On                 |
| Load images to stamp segments                 | Off                |
| Load images to graphic segments               | Off                |
| Auto open inline display                      | Off                |
| Auto close inline display                     | Off                |
| Start measurement without further preparation | Off                |
| Wait for user to start                        | On                 |
| Start measurements                            | Single measurement |

**Routine**

|                          |                    |
|--------------------------|--------------------|
| Slice group              | 1                  |
| Slices                   | 85                 |
| Dist. factor             | 0 %                |
| Position                 | L0.0 P13.6 H7.5 mm |
| Orientation              | T > C-20.0         |
| Phase enc. dir.          | A >> P             |
| AutoAlign                | Head > Brain       |
| Phase oversampling       | 0 %                |
| FoV read                 | 208 mm             |
| FoV phase                | 100.0 %            |
| Slice thickness          | 1.60 mm            |
| TR                       | 1000 ms            |
| TE                       | 22.20 ms           |
| Multi-band accel. factor | 5                  |
| Filter                   | None               |
| Coil elements            | A32                |

**Contrast - Common**

|                   |          |
|-------------------|----------|
| TR                | 1000 ms  |
| TE                | 22.20 ms |
| MTC               | Off      |
| Magn. preparation | None     |
| Flip angle        | 45 deg   |
| Fat suppr.        | Fat sat. |

**Contrast - Dynamic**

|                 |           |
|-----------------|-----------|
| Averaging mode  | Long term |
| Reconstruction  | Magnitude |
| Measurements    | 468       |
| Delay in TR     | 0 ms      |
| Multiple series | Off       |

**Resolution - Common**

|                       |         |
|-----------------------|---------|
| FoV read              | 208 mm  |
| FoV phase             | 100.0 % |
| Slice thickness       | 1.60 mm |
| Base resolution       | 130     |
| Phase resolution      | 100 %   |
| Phase partial Fourier | 7/8     |
| Interpolation         | Off     |

**Resolution - iPAT**

|                     |        |
|---------------------|--------|
| PAT mode            | GRAPPA |
| Accel. factor PE    | 2      |
| Ref. lines PE       | 96     |
| Reference scan mode | GRE    |

**Resolution - Filter Image**

|                   |     |
|-------------------|-----|
| Distortion Corr.  | Off |
| Prescan Normalize | Off |

**Resolution - Filter Rawdata**

|                   |     |
|-------------------|-----|
| Raw filter        | Off |
| Elliptical filter | Off |
| Hamming           | Off |

**Geometry - Common**

|                          |                    |
|--------------------------|--------------------|
| Slice group              | 1                  |
| Slices                   | 85                 |
| Dist. factor             | 0 %                |
| Position                 | L0.0 P13.6 H7.5 mm |
| Orientation              | T > C-20.0         |
| Phase enc. dir.          | A >> P             |
| FoV read                 | 208 mm             |
| FoV phase                | 100.0 %            |
| Slice thickness          | 1.60 mm            |
| TR                       | 1000 ms            |
| Multi-slice mode         | Interleaved        |
| Series                   | Interleaved        |
| Multi-band accel. factor | 5                  |

**Geometry - AutoAlign**

|                     |                    |
|---------------------|--------------------|
| Slice group         | 1                  |
| Position            | L0.0 P13.6 H7.5 mm |
| Orientation         | T > C-20.0         |
| Phase enc. dir.     | A >> P             |
| AutoAlign           | Head > Brain       |
| Initial Position    | L0.0 P13.6 H7.5    |
| L                   | 0.0 mm             |
| P                   | 13.6 mm            |
| H                   | 7.5 mm             |
| Initial Rotation    | -0.52 deg          |
| Initial Orientation | T > C              |
| T > C               | -20.0              |
| > S                 | 0.0                |

**Geometry - Saturation**

|              |          |
|--------------|----------|
| Fat suppr.   | Fat sat. |
| Special sat. | None     |

**Geometry - Tim Planning Suite**

|                   |      |
|-------------------|------|
| Set-n-Go Protocol | Off  |
| Table position    | H    |
| Table position    | 0 mm |
| Inline Composing  | Off  |

**System - Miscellaneous**

|                     |                      |
|---------------------|----------------------|
| Positioning mode    | FIX                  |
| Table position      | H                    |
| Table position      | 0 mm                 |
| MSMA                | S - C - T            |
| Sagittal            | R >> L               |
| Coronal             | A >> P               |
| Transversal         | F >> H               |
| Coil Combine Mode   | Sum of Squares       |
| Matrix Optimization | Off                  |
| AutoAlign           | Head > Brain         |
| Coil Select Mode    | Off - AutoCoilSelect |

**System - Adjustments**

|                          |          |
|--------------------------|----------|
| B0 Shim mode             | Advanced |
| B1 Shim mode             | TrueForm |
| Confirm freq. adjustment | Off      |
| Assume Dominant Fat      | Off      |
| Assume Silicone          | Off      |
| Adjustment Tolerance     | Auto     |

**System - Adjust Volume**

|               |                    |
|---------------|--------------------|
| ! Position    | L0.7 P13.2 H9.5 mm |
| ! Orientation | T > C-15.6 > S0.3  |
| ! Rotation    | 0.00 deg           |
| ! A >> P      | 170 mm             |
| ! R >> L      | 130 mm             |
| ! F >> H      | 120 mm             |
| Reset         | Off                |

**System - Tx/Rx**

|                     |                |
|---------------------|----------------|
| Frequency 1H        | 297.207726 MHz |
| Correction factor   | 1              |
| Gain                | High           |
| Img. Scale Cor.     | 1.000          |
| Reset               | Off            |
| ? Ref. amplitude 1H | 0.000 V        |

**Physio - Signal1**

|                          |         |
|--------------------------|---------|
| 1st Signal/Mode          | None    |
| TR                       | 1000 ms |
| Multi-band accel. factor | 5       |

**BOLD**

|                         |          |
|-------------------------|----------|
| GLM Statistics          | Off      |
| Dynamic t-maps          | Off      |
| Ignore meas. at start   | 0        |
| Ignore after transition | 0        |
| Model transition states | On       |
| Temp. highpass filter   | On       |
| Threshold               | 4.00     |
| Paradigm size           | 20       |
| Meas[1]                 | Baseline |
| Meas[2]                 | Baseline |
| Meas[3]                 | Baseline |
| Meas[4]                 | Baseline |
| Meas[5]                 | Baseline |
| Meas[6]                 | Baseline |
| Meas[7]                 | Baseline |
| Meas[8]                 | Baseline |
| Meas[9]                 | Baseline |
| Meas[10]                | Baseline |
| Meas[11]                | Active   |
| Meas[12]                | Active   |
| Meas[13]                | Active   |
| Meas[14]                | Active   |
| Meas[15]                | Active   |
| Meas[16]                | Active   |
| Meas[17]                | Active   |
| Meas[18]                | Active   |
| Meas[19]                | Active   |
| Meas[20]                | Active   |
| Motion correction       | Off      |
| Spatial filter          | Off      |
| Measurements            | 468      |
| Delay in TR             | 0 ms     |
| Multiple series         | Off      |

**Sequence - Part 1**

|                   |             |
|-------------------|-------------|
| Introduction      | Off         |
| Contrasts         | 1           |
| Flow comp.        | No          |
| Multi-slice mode  | Interleaved |
| Free echo spacing | Off         |
| Echo spacing      | 0.64 ms     |
| Bandwidth         | 1924 Hz/Px  |

**Sequence - Part 2**

|               |        |
|---------------|--------|
| EPI factor    | 130    |
| Gradient mode | Normal |
| RF spoiling   | Off    |

**Sequence - Special**

|                          |           |
|--------------------------|-----------|
| Excite pulse duration    | 5760 us   |
| Single-band images       | On        |
| MB LeakBlock kernel      | Off       |
| MB dual kernel           | Off       |
| MB RF phase scramble     | On        |
| SENSE1 coil combine      | Off       |
| Invert RO/PE polarity    | Off       |
| PF omits higher k-space  | Off       |
| Disable freq. update     | Off       |
| Force equal slice timing | Off       |
| Online multi-band recon. | Online    |
| FFT scale factor         | 0.60      |
| Fat saturation FA        | 110.0 deg |
| GRE iPAT ref. FA         | 12.0 deg  |
| Physio recording         | Off       |
| Triggering scheme        | Standard  |

\\USER\PHCP\functional\final\BOLD\_COP\_task2\_AP

TA: 6:31 PM: FIX Voxel size: 1.6×1.6×1.6 mmPAT: 2 Rel. SNR: 1.00 : epfid

**Properties**

|                                               |                    |
|-----------------------------------------------|--------------------|
| Prio recon                                    | Off                |
| Load images to viewer                         | Off                |
| Inline movie                                  | Off                |
| Auto store images                             | On                 |
| Load images to stamp segments                 | Off                |
| Load images to graphic segments               | Off                |
| Auto open inline display                      | Off                |
| Auto close inline display                     | Off                |
| Start measurement without further preparation | Off                |
| Wait for user to start                        | On                 |
| Start measurements                            | Single measurement |

**Routine**

|                          |                    |
|--------------------------|--------------------|
| Slice group              | 1                  |
| Slices                   | 85                 |
| Dist. factor             | 0 %                |
| Position                 | L0.0 P13.6 H7.5 mm |
| Orientation              | T > C-20.0         |
| Phase enc. dir.          | A >> P             |
| AutoAlign                | Head > Brain       |
| Phase oversampling       | 0 %                |
| FoV read                 | 208 mm             |
| FoV phase                | 100.0 %            |
| Slice thickness          | 1.60 mm            |
| TR                       | 1000 ms            |
| TE                       | 22.20 ms           |
| Multi-band accel. factor | 5                  |
| Filter                   | None               |
| Coil elements            | A32                |

**Contrast - Common**

|                   |          |
|-------------------|----------|
| TR                | 1000 ms  |
| TE                | 22.20 ms |
| MTC               | Off      |
| Magn. preparation | None     |
| Flip angle        | 45 deg   |
| Fat suppr.        | Fat sat. |

**Contrast - Dynamic**

|                 |           |
|-----------------|-----------|
| Averaging mode  | Long term |
| Reconstruction  | Magnitude |
| Measurements    | 312       |
| Delay in TR     | 0 ms      |
| Multiple series | Off       |

**Resolution - Common**

|                       |         |
|-----------------------|---------|
| FoV read              | 208 mm  |
| FoV phase             | 100.0 % |
| Slice thickness       | 1.60 mm |
| Base resolution       | 130     |
| Phase resolution      | 100 %   |
| Phase partial Fourier | 7/8     |
| Interpolation         | Off     |

**Resolution - iPAT**

|                     |        |
|---------------------|--------|
| PAT mode            | GRAPPA |
| Accel. factor PE    | 2      |
| Ref. lines PE       | 96     |
| Reference scan mode | GRE    |

**Resolution - Filter Image**

|                   |     |
|-------------------|-----|
| Distortion Corr.  | Off |
| Prescan Normalize | Off |

**Resolution - Filter Rawdata**

|                   |     |
|-------------------|-----|
| Raw filter        | Off |
| Elliptical filter | Off |
| Hamming           | Off |

**Geometry - Common**

|                          |                    |
|--------------------------|--------------------|
| Slice group              | 1                  |
| Slices                   | 85                 |
| Dist. factor             | 0 %                |
| Position                 | L0.0 P13.6 H7.5 mm |
| Orientation              | T > C-20.0         |
| Phase enc. dir.          | A >> P             |
| FoV read                 | 208 mm             |
| FoV phase                | 100.0 %            |
| Slice thickness          | 1.60 mm            |
| TR                       | 1000 ms            |
| Multi-slice mode         | Interleaved        |
| Series                   | Interleaved        |
| Multi-band accel. factor | 5                  |

**Geometry - AutoAlign**

|                     |                    |
|---------------------|--------------------|
| Slice group         | 1                  |
| Position            | L0.0 P13.6 H7.5 mm |
| Orientation         | T > C-20.0         |
| Phase enc. dir.     | A >> P             |
| AutoAlign           | Head > Brain       |
| Initial Position    | L0.0 P13.6 H7.5    |
| L                   | 0.0 mm             |
| P                   | 13.6 mm            |
| H                   | 7.5 mm             |
| Initial Rotation    | -0.52 deg          |
| Initial Orientation | T > C              |
| T > C               | -20.0              |
| > S                 | 0.0                |

**Geometry - Saturation**

|              |          |
|--------------|----------|
| Fat suppr.   | Fat sat. |
| Special sat. | None     |

**Geometry - Tim Planning Suite**

|                   |      |
|-------------------|------|
| Set-n-Go Protocol | Off  |
| Table position    | H    |
| Table position    | 0 mm |
| Inline Composing  | Off  |

**System - Miscellaneous**

|                     |                      |
|---------------------|----------------------|
| Positioning mode    | FIX                  |
| Table position      | H                    |
| Table position      | 0 mm                 |
| MSMA                | S - C - T            |
| Sagittal            | R >> L               |
| Coronal             | A >> P               |
| Transversal         | F >> H               |
| Coil Combine Mode   | Sum of Squares       |
| Matrix Optimization | Off                  |
| AutoAlign           | Head > Brain         |
| Coil Select Mode    | Off - AutoCoilSelect |

**System - Adjustments**

|                          |          |
|--------------------------|----------|
| B0 Shim mode             | Advanced |
| B1 Shim mode             | TrueForm |
| Confirm freq. adjustment | Off      |
| Assume Dominant Fat      | Off      |
| Assume Silicone          | Off      |
| Adjustment Tolerance     | Auto     |

**System - Adjust Volume**

|               |                    |
|---------------|--------------------|
| ! Position    | L0.7 P13.2 H9.5 mm |
| ! Orientation | T > C-15.6 > S0.3  |
| ! Rotation    | 0.00 deg           |
| ! A >> P      | 170 mm             |
| ! R >> L      | 130 mm             |
| ! F >> H      | 120 mm             |
| Reset         | Off                |

**System - Tx/Rx**

|                     |                |
|---------------------|----------------|
| Frequency 1H        | 297.207726 MHz |
| Correction factor   | 1              |
| Gain                | High           |
| Img. Scale Cor.     | 1.000          |
| Reset               | Off            |
| ? Ref. amplitude 1H | 0.000 V        |

**Physio - Signal1**

|                          |         |
|--------------------------|---------|
| 1st Signal/Mode          | None    |
| TR                       | 1000 ms |
| Multi-band accel. factor | 5       |

**BOLD**

|                         |          |
|-------------------------|----------|
| GLM Statistics          | Off      |
| Dynamic t-maps          | Off      |
| Ignore meas. at start   | 0        |
| Ignore after transition | 0        |
| Model transition states | On       |
| Temp. highpass filter   | On       |
| Threshold               | 4.00     |
| Paradigm size           | 20       |
| Meas[1]                 | Baseline |
| Meas[2]                 | Baseline |
| Meas[3]                 | Baseline |
| Meas[4]                 | Baseline |
| Meas[5]                 | Baseline |
| Meas[6]                 | Baseline |
| Meas[7]                 | Baseline |
| Meas[8]                 | Baseline |
| Meas[9]                 | Baseline |
| Meas[10]                | Baseline |
| Meas[11]                | Active   |
| Meas[12]                | Active   |
| Meas[13]                | Active   |
| Meas[14]                | Active   |
| Meas[15]                | Active   |
| Meas[16]                | Active   |
| Meas[17]                | Active   |
| Meas[18]                | Active   |
| Meas[19]                | Active   |
| Meas[20]                | Active   |
| Motion correction       | Off      |
| Spatial filter          | Off      |
| Measurements            | 312      |
| Delay in TR             | 0 ms     |
| Multiple series         | Off      |

**Sequence - Part 1**

|                   |             |
|-------------------|-------------|
| Introduction      | Off         |
| Contrasts         | 1           |
| Flow comp.        | No          |
| Multi-slice mode  | Interleaved |
| Free echo spacing | Off         |
| Echo spacing      | 0.64 ms     |
| Bandwidth         | 1924 Hz/Px  |

**Sequence - Part 2**

|               |        |
|---------------|--------|
| EPI factor    | 130    |
| Gradient mode | Normal |
| RF spoiling   | Off    |

**Sequence - Special**

|                          |           |
|--------------------------|-----------|
| Excite pulse duration    | 5760 us   |
| Single-band images       | On        |
| MB LeakBlock kernel      | Off       |
| MB dual kernel           | Off       |
| MB RF phase scramble     | On        |
| SENSE1 coil combine      | Off       |
| Invert RO/PE polarity    | Off       |
| PF omits higher k-space  | Off       |
| Disable freq. update     | Off       |
| Force equal slice timing | Off       |
| Online multi-band recon. | Online    |
| FFT scale factor         | 0.60      |
| Fat saturation FA        | 110.0 deg |
| GRE iPAT ref. FA         | 12.0 deg  |
| Physio recording         | Off       |
| Triggering scheme        | Standard  |

## \\USER\PHCP\functional\final\BOLD\_PRF2\_AP

TA: 6:43 PM: FIX Voxel size: 1.6×1.6×1.6 mmPAT: 2 Rel. SNR: 1.00 : epfid

**Properties**

|                                               |                    |
|-----------------------------------------------|--------------------|
| Prio recon                                    | Off                |
| Load images to viewer                         | Off                |
| Inline movie                                  | Off                |
| Auto store images                             | On                 |
| Load images to stamp segments                 | Off                |
| Load images to graphic segments               | Off                |
| Auto open inline display                      | Off                |
| Auto close inline display                     | Off                |
| Start measurement without further preparation | Off                |
| Wait for user to start                        | On                 |
| Start measurements                            | Single measurement |

**Routine**

|                          |                    |
|--------------------------|--------------------|
| Slice group              | 1                  |
| Slices                   | 85                 |
| Dist. factor             | 0 %                |
| Position                 | L0.0 P13.6 H7.5 mm |
| Orientation              | T > C-20.0         |
| Phase enc. dir.          | A >> P             |
| AutoAlign                | Head > Brain       |
| Phase oversampling       | 0 %                |
| FoV read                 | 208 mm             |
| FoV phase                | 100.0 %            |
| Slice thickness          | 1.60 mm            |
| TR                       | 1000 ms            |
| TE                       | 22.20 ms           |
| Multi-band accel. factor | 5                  |
| Filter                   | None               |
| Coil elements            | A32                |

**Contrast - Common**

|                   |          |
|-------------------|----------|
| TR                | 1000 ms  |
| TE                | 22.20 ms |
| MTC               | Off      |
| Magn. preparation | None     |
| Flip angle        | 45 deg   |
| Fat suppr.        | Fat sat. |

**Contrast - Dynamic**

|                 |           |
|-----------------|-----------|
| Averaging mode  | Long term |
| Reconstruction  | Magnitude |
| Measurements    | 324       |
| Delay in TR     | 0 ms      |
| Multiple series | Off       |

**Resolution - Common**

|                       |         |
|-----------------------|---------|
| FoV read              | 208 mm  |
| FoV phase             | 100.0 % |
| Slice thickness       | 1.60 mm |
| Base resolution       | 130     |
| Phase resolution      | 100 %   |
| Phase partial Fourier | 7/8     |
| Interpolation         | Off     |

**Resolution - iPAT**

|                     |        |
|---------------------|--------|
| PAT mode            | GRAPPA |
| Accel. factor PE    | 2      |
| Ref. lines PE       | 96     |
| Reference scan mode | GRE    |

**Resolution - Filter Image**

|                   |     |
|-------------------|-----|
| Distortion Corr.  | Off |
| Prescan Normalize | Off |

**Resolution - Filter Rawdata**

|                   |     |
|-------------------|-----|
| Raw filter        | Off |
| Elliptical filter | Off |
| Hamming           | Off |

**Geometry - Common**

|                          |                    |
|--------------------------|--------------------|
| Slice group              | 1                  |
| Slices                   | 85                 |
| Dist. factor             | 0 %                |
| Position                 | L0.0 P13.6 H7.5 mm |
| Orientation              | T > C-20.0         |
| Phase enc. dir.          | A >> P             |
| FoV read                 | 208 mm             |
| FoV phase                | 100.0 %            |
| Slice thickness          | 1.60 mm            |
| TR                       | 1000 ms            |
| Multi-slice mode         | Interleaved        |
| Series                   | Interleaved        |
| Multi-band accel. factor | 5                  |

**Geometry - AutoAlign**

|                     |                    |
|---------------------|--------------------|
| Slice group         | 1                  |
| Position            | L0.0 P13.6 H7.5 mm |
| Orientation         | T > C-20.0         |
| Phase enc. dir.     | A >> P             |
| AutoAlign           | Head > Brain       |
| Initial Position    | L0.0 P13.6 H7.5    |
| L                   | 0.0 mm             |
| P                   | 13.6 mm            |
| H                   | 7.5 mm             |
| Initial Rotation    | -0.52 deg          |
| Initial Orientation | T > C              |
| T > C               | -20.0              |
| > S                 | 0.0                |

**Geometry - Saturation**

|              |          |
|--------------|----------|
| Fat suppr.   | Fat sat. |
| Special sat. | None     |

**Geometry - Tim Planning Suite**

|                   |      |
|-------------------|------|
| Set-n-Go Protocol | Off  |
| Table position    | H    |
| Table position    | 0 mm |
| Inline Composing  | Off  |

**System - Miscellaneous**

|                     |                      |
|---------------------|----------------------|
| Positioning mode    | FIX                  |
| Table position      | H                    |
| Table position      | 0 mm                 |
| MSMA                | S - C - T            |
| Sagittal            | R >> L               |
| Coronal             | A >> P               |
| Transversal         | F >> H               |
| Coil Combine Mode   | Sum of Squares       |
| Matrix Optimization | Off                  |
| AutoAlign           | Head > Brain         |
| Coil Select Mode    | Off - AutoCoilSelect |



**System - Adjustments**

|                          |          |
|--------------------------|----------|
| B0 Shim mode             | Advanced |
| B1 Shim mode             | TrueForm |
| Confirm freq. adjustment | Off      |
| Assume Dominant Fat      | Off      |
| Assume Silicone          | Off      |
| Adjustment Tolerance     | Auto     |

**System - Adjust Volume**

|               |                    |
|---------------|--------------------|
| ! Position    | L0.7 P13.2 H9.5 mm |
| ! Orientation | T > C-15.6 > S0.3  |
| ! Rotation    | 0.00 deg           |
| ! A >> P      | 170 mm             |
| ! R >> L      | 130 mm             |
| ! F >> H      | 120 mm             |
| Reset         | Off                |

**System - Tx/Rx**

|                     |                |
|---------------------|----------------|
| Frequency 1H        | 297.207726 MHz |
| Correction factor   | 1              |
| Gain                | High           |
| Img. Scale Cor.     | 1.000          |
| Reset               | Off            |
| ? Ref. amplitude 1H | 0.000 V        |

**Physio - Signal1**

|                          |         |
|--------------------------|---------|
| 1st Signal/Mode          | None    |
| TR                       | 1000 ms |
| Multi-band accel. factor | 5       |

**BOLD**

|                         |          |
|-------------------------|----------|
| GLM Statistics          | Off      |
| Dynamic t-maps          | Off      |
| Ignore meas. at start   | 0        |
| Ignore after transition | 0        |
| Model transition states | On       |
| Temp. highpass filter   | On       |
| Threshold               | 4.00     |
| Paradigm size           | 20       |
| Meas[1]                 | Baseline |
| Meas[2]                 | Baseline |
| Meas[3]                 | Baseline |
| Meas[4]                 | Baseline |
| Meas[5]                 | Baseline |
| Meas[6]                 | Baseline |
| Meas[7]                 | Baseline |
| Meas[8]                 | Baseline |
| Meas[9]                 | Baseline |
| Meas[10]                | Baseline |
| Meas[11]                | Active   |
| Meas[12]                | Active   |
| Meas[13]                | Active   |
| Meas[14]                | Active   |
| Meas[15]                | Active   |
| Meas[16]                | Active   |
| Meas[17]                | Active   |
| Meas[18]                | Active   |
| Meas[19]                | Active   |
| Meas[20]                | Active   |
| Motion correction       | Off      |
| Spatial filter          | Off      |
| Measurements            | 324      |
| Delay in TR             | 0 ms     |
| Multiple series         | Off      |

**Sequence - Part 1**

|                   |             |
|-------------------|-------------|
| Introduction      | Off         |
| Contrasts         | 1           |
| Flow comp.        | No          |
| Multi-slice mode  | Interleaved |
| Free echo spacing | Off         |
| Echo spacing      | 0.64 ms     |
| Bandwidth         | 1924 Hz/Px  |

**Sequence - Part 2**

|               |        |
|---------------|--------|
| EPI factor    | 130    |
| Gradient mode | Normal |
| RF spoiling   | Off    |

**Sequence - Special**

|                          |           |
|--------------------------|-----------|
| Excite pulse duration    | 5760 us   |
| Single-band images       | On        |
| MB LeakBlock kernel      | Off       |
| MB dual kernel           | Off       |
| MB RF phase scramble     | On        |
| SENSE1 coil combine      | Off       |
| Invert RO/PE polarity    | Off       |
| PF omits higher k-space  | Off       |
| Disable freq. update     | Off       |
| Force equal slice timing | Off       |
| Online multi-band recon. | Online    |
| FFT scale factor         | 0.60      |
| Fat saturation FA        | 110.0 deg |
| GRE iPAT ref. FA         | 12.0 deg  |
| Physio recording         | Off       |
| Triggering scheme        | Standard  |
