# Supplementary material for: The psychosis human connectome project: Design and rationale for studies of visual neurophysiology
Source: PubMed Central journal article supplement — Neuroimage. Author manuscript; Available in PMC 2023 May 15. (PMC10153004; doi:10.1016/j.neuroimage.2023.120060), 2023-03-30
Supplement: NIHMS1891314-supplement-2.pdf [file NIHMS1891314-supplement-2.pdf]

|                          |
|--------------------------|
| <b>Table of contents</b> |
|--------------------------|

|        |
|--------|
| \\USER |
|--------|

|      |
|------|
| PHCP |
|------|

|     |
|-----|
| MRS |
|-----|

|       |
|-------|
| final |
|-------|

|              |            |      |         |         |              |        |    |
|--------------|------------|------|---------|---------|--------------|--------|----|
| localizer    |            |      |         |         |              |        |    |
| AAScout_32ch |            |      |         |         |              |        |    |
| localizer    |            |      |         |         |              |        |    |
| aligned      |            |      |         |         |              |        |    |
| t1inplane    | 64sl       | occ  | 1p25iso | 2p5sTR  | 160FOV       |        |    |
| OCC          | fastestmap |      |         |         |              | lin    |    |
| OCC          | fastestmap |      |         |         |              | all    |    |
| OCC          | fastestmap |      |         |         |              | all    |    |
| OCC          | fastestmap |      |         |         |              | all    |    |
| OCC          | fastestmap |      |         |         |              | lin6   |    |
| OCC          | linewidth  |      |         |         |              | check  |    |
| OCC          | steam      | eja  | cal     | fa      | 50           | 10     | 7  |
| OCC          | steam      | eja  | cal     | fa      | 80           | 3      | 10 |
| OCC          | steam      |      | eja     | ws      |              | check  |    |
| OCC          | steam      |      |         | eja     | metab        |        |    |
| OCC          | steam      |      |         | eja     | w1           |        |    |
| OCC          | steam      |      |         | eja     | w4           |        |    |
| OCC          | steam      |      | eja     | w1      | noOVS        |        |    |
| OCC          | steam      | eja  | ws      | FA      | optimization |        |    |
| OCC          | steam      | eja  | ws      | delay   | 7            |        |    |
| PFC          |            |      |         |         |              |        |    |
| localizer    |            |      |         |         |              |        |    |
| PFC          |            |      |         |         |              |        |    |
| AAScout_32ch |            |      |         |         |              |        |    |
| localizer    |            |      |         |         |              |        |    |
| aligned      |            |      |         |         |              |        |    |
| PFC          | t1inplane  | 64sl | occ     | 1p25iso | 2p5sTR       | 160FOV |    |
| PFC          | fastestmap |      |         |         |              | lin    |    |
| PFC          | fastestmap |      |         |         |              | all    |    |
| PFC          | fastestmap |      |         |         |              | all    |    |
| PFC          | fastestmap |      |         |         |              | all    |    |
| PFC          | fastestmap |      |         |         |              | lin6   |    |
| PFC          | linewidth  |      |         |         |              | check  |    |
| PFC          | steam      | eja  | cal     | fa      | 50           | 10     | 7  |
| PFC          | steam      | eja  | cal     | fa      | 80           | 3      | 10 |
| PFC          | steam      |      | eja     | ws      |              | check  |    |
| PFC          | steam      |      |         | eja     | metab        |        |    |
| PFC          | steam      |      |         | eja     | w1           |        |    |
| PFC          | steam      |      |         | eja     | w4           |        |    |
| PFC          | steam      |      | eja     | w1      | noOVS        |        |    |
| PFC          | steam      | eja  | ws      | FA      | optimization |        |    |
| PFC          | steam      | eja  | ws      | delay   | 7            |        |    |

\\USER\PHCP\MRS\final\localizer

TA: 0:13 PM: REF Voxel size: 0.5×0.5×7.0 mmPAT: Off Rel. SNR: 1.00 : qfl

**Properties**

|                                               |                    |
|-----------------------------------------------|--------------------|
| Prio recon                                    | Off                |
| Load images to viewer                         | On                 |
| Inline movie                                  | Off                |
| Auto store images                             | On                 |
| Load images to stamp segments                 | On                 |
| Load images to graphic segments               | On                 |
| Auto open inline display                      | On                 |
| Auto close inline display                     | Off                |
| Start measurement without further preparation | Off                |
| Wait for user to start                        | Off                |
| Start measurements                            | Single measurement |

**Routine**

|                    |                   |
|--------------------|-------------------|
| Slice group        | 1                 |
| Slices             | 1                 |
| Dist. factor       | 20 %              |
| Position           | Isocenter         |
| Orientation        | Sagittal          |
| Phase enc. dir.    | A >> P            |
| Slice group        | 2                 |
| Slices             | 1                 |
| Dist. factor       | 20 %              |
| Position           | Isocenter         |
| Orientation        | Transversal       |
| Phase enc. dir.    | A >> P            |
| Slice group        | 3                 |
| Slices             | 1                 |
| Dist. factor       | 20 %              |
| Position           | Isocenter         |
| Orientation        | Coronal           |
| Phase enc. dir.    | R >> L            |
| AutoAlign          | ---               |
| Phase oversampling | 0 %               |
| FoV read           | 250 mm            |
| FoV phase          | 100.0 %           |
| Slice thickness    | 7.0 mm            |
| TR                 | 8.6 ms            |
| TE                 | 4.00 ms           |
| Averages           | 2                 |
| Concatenations     | 3                 |
| Filter             | Elliptical filter |
| Coil elements      | OCC;PFC           |

**Contrast - Common**

|                   |         |
|-------------------|---------|
| TR                | 8.6 ms  |
| TE                | 4.00 ms |
| TD                | 0 ms    |
| MTC               | Off     |
| Magn. preparation | None    |
| Flip angle        | 20 deg  |
| Fat suppr.        | None    |
| Water suppr.      | None    |
| SWI               | Off     |

**Contrast - Dynamic**

|                |            |
|----------------|------------|
| Averages       | 2          |
| Averaging mode | Short term |
| Reconstruction | Magnitude  |
| Measurements   | 1          |

**Contrast - Dynamic**

|                 |                  |
|-----------------|------------------|
| Multiple series | Each measurement |
|-----------------|------------------|

**Resolution - Common**

|                       |         |
|-----------------------|---------|
| FoV read              | 250 mm  |
| FoV phase             | 100.0 % |
| Slice thickness       | 7.0 mm  |
| Base resolution       | 256     |
| Phase resolution      | 90 %    |
| Phase partial Fourier | Off     |
| Interpolation         | On      |

**Resolution - iPAT**

|          |      |
|----------|------|
| PAT mode | None |
|----------|------|

**Resolution - Filter Image**

|                   |     |
|-------------------|-----|
| Image Filter      | Off |
| Distortion Corr.  | Off |
| Prescan Normalize | Off |
| Normalize         | Off |
| B1 filter         | Off |

**Resolution - Filter Rawdata**

|                   |     |
|-------------------|-----|
| Raw filter        | Off |
| Elliptical filter | On  |

**Geometry - Common**

|                  |             |
|------------------|-------------|
| Slice group      | 1           |
| Slices           | 1           |
| Dist. factor     | 20 %        |
| Position         | Isocenter   |
| Orientation      | Sagittal    |
| Phase enc. dir.  | A >> P      |
| Slice group      | 2           |
| Slices           | 1           |
| Dist. factor     | 20 %        |
| Position         | Isocenter   |
| Orientation      | Transversal |
| Phase enc. dir.  | A >> P      |
| Slice group      | 3           |
| Slices           | 1           |
| Dist. factor     | 20 %        |
| Position         | Isocenter   |
| Orientation      | Coronal     |
| Phase enc. dir.  | R >> L      |
| FoV read         | 250 mm      |
| FoV phase        | 100.0 %     |
| Slice thickness  | 7.0 mm      |
| TR               | 8.6 ms      |
| Multi-slice mode | Sequential  |
| Series           | Interleaved |
| Concatenations   | 3           |

**Geometry - AutoAlign**

|                 |             |
|-----------------|-------------|
| Slice group     | 1           |
| Position        | Isocenter   |
| Orientation     | Sagittal    |
| Phase enc. dir. | A >> P      |
| Slice group     | 2           |
| Position        | Isocenter   |
| Orientation     | Transversal |

**Geometry - AutoAlign**

|                     |           |
|---------------------|-----------|
| Phase enc. dir.     | A >> P    |
| Slice group         | 3         |
| Position            | Isocenter |
| Orientation         | Coronal   |
| Phase enc. dir.     | R >> L    |
| AutoAlign           | ---       |
| Initial Position    | Isocenter |
| L                   | 0.0 mm    |
| P                   | 0.0 mm    |
| H                   | 0.0 mm    |
| Initial Rotation    | 0.00 deg  |
| Initial Orientation | Sagittal  |

**Geometry - Saturation**

|                 |          |
|-----------------|----------|
| Saturation mode | Standard |
| Fat suppr.      | None     |
| Water suppr.    | None     |
| Special sat.    | None     |

**Geometry - Tim Planning Suite**

|                   |      |
|-------------------|------|
| Set-n-Go Protocol | Off  |
| Table position    | H    |
| Table position    | 0 mm |
| Inline Composing  | Off  |

**Geometry - Tim CT**

|                 |         |
|-----------------|---------|
| Tim CT mode     | Off     |
| Slices          | 1       |
| Slice thickness | 7.0 mm  |
| Dist. factor    | 20 %    |
| FoV read        | 250 mm  |
| FoV phase       | 100.0 % |
| Segments        | 1       |

**System - Miscellaneous**

|                     |                      |
|---------------------|----------------------|
| Positioning mode    | REF                  |
| Table position      | F                    |
| Table position      | 0 mm                 |
| MSMA                | S - C - T            |
| Sagittal            | R >> L               |
| Coronal             | A >> P               |
| Transversal         | F >> H               |
| Coil Combine Mode   | Sum of Squares       |
| Save uncombined     | Off                  |
| Matrix Optimization | Off                  |
| AutoAlign           | ---                  |
| Coil Select Mode    | Off - AutoCoilSelect |

**System - Adjustments**

|                          |          |
|--------------------------|----------|
| B0 Shim mode             | Tune up  |
| B1 Shim mode             | TrueForm |
| Confirm freq. adjustment | Off      |
| Assume Dominant Fat      | Off      |
| Assume Silicone          | Off      |
| Adjustment Tolerance     | Auto     |

**System - Adjust Volume**

|             |             |
|-------------|-------------|
| Position    | Isocenter   |
| Orientation | Transversal |
| Rotation    | 0.00 deg    |
| A >> P      | 263 mm      |
| R >> L      | 350 mm      |
| F >> H      | 350 mm      |
| Reset       | Off         |

**System - Tx/Rx**

|                     |                |
|---------------------|----------------|
| Frequency 1H        | 297.207726 MHz |
| Correction factor   | 1              |
| Gain                | High           |
| Img. Scale Cor.     | 1.000          |
| Reset               | Off            |
| ? Ref. amplitude 1H | 0.000 V        |

**Physio - Signal1**

|                 |        |
|-----------------|--------|
| 1st Signal/Mode | None   |
| TR              | 8.6 ms |
| Concatenations  | 3      |
| Segments        | 1      |

**Physio - Cardiac**

|                   |         |
|-------------------|---------|
| Tagging           | None    |
| Magn. preparation | None    |
| Fat suppr.        | None    |
| Dark blood        | Off     |
| FoV read          | 250 mm  |
| FoV phase         | 100.0 % |
| Phase resolution  | 90 %    |

**Physio - PACE**

|                |     |
|----------------|-----|
| Resp. control  | Off |
| Concatenations | 3   |

**Inline - Common**

|                      |     |
|----------------------|-----|
| Subtract             | Off |
| Measurements         | 1   |
| StdDev               | Off |
| Liver registration   | Off |
| Save original images | On  |

**Inline - MIP**

|                      |     |
|----------------------|-----|
| MIP-Sag              | Off |
| MIP-Cor              | Off |
| MIP-Tra              | Off |
| MIP-Time             | Off |
| Save original images | On  |

**Inline - Soft Tissue**

|              |     |
|--------------|-----|
| Wash - In    | Off |
| Wash - Out   | Off |
| TTP          | Off |
| PEI          | Off |
| MIP - time   | Off |
| Measurements | 1   |

**Inline - Composing**

|                  |     |
|------------------|-----|
| Inline Composing | Off |
| Distortion Corr. | Off |

**Inline - MapIt**

|                      |         |
|----------------------|---------|
| Save original images | On      |
| MapIt                | None    |
| Flip angle           | 20 deg  |
| Measurements         | 1       |
| Contrasts            | 1       |
| TR                   | 8.6 ms  |
| TE                   | 4.00 ms |

**Sequence - Part 1**

|              |    |
|--------------|----|
| Introduction | On |
|--------------|----|

**Sequence - Part 1**

|                     |            |
|---------------------|------------|
| Dimension           | 2D         |
| Phase stabilisation | Off        |
| Asymmetric echo     | Allowed    |
| Contrasts           | 1          |
| Flow comp.          | No         |
| Multi-slice mode    | Sequential |
| Bandwidth           | 320 Hz/Px  |

**Sequence - Part 2**

|                          |            |
|--------------------------|------------|
| Segments                 | 1          |
| Acoustic noise reduction | Active     |
| RF pulse type            | Normal     |
| Gradient mode            | Normal     |
| Excitation               | Slice-sel. |
| RF spoiling              | On         |

**Sequence - Nuclei**

|                       |         |
|-----------------------|---------|
| TX/RX Nucleus         | 1H      |
| TX/RX delta frequency | 0 Hz    |
| TX Nucleus            | None    |
| TX delta frequency    | 0 Hz    |
| Coil elements         | OCC;PFC |

**Sequence - Assistant**

|      |     |
|------|-----|
| Mode | Off |
|------|-----|

\\USER\PHCP\MRS\final\AAScout\_32ch

TA: 0:18 PM: REF Voxel size: 1.6×1.6×1.6 mmPAT: 2 Rel. SNR: 1.00 : fl

**Properties**

|                                               |                    |
|-----------------------------------------------|--------------------|
| Prio recon                                    | Off                |
| Load images to viewer                         | On                 |
| Inline movie                                  | Off                |
| Auto store images                             | On                 |
| Load images to stamp segments                 | On                 |
| Load images to graphic segments               | On                 |
| Auto open inline display                      | Off                |
| Auto close inline display                     | Off                |
| Start measurement without further preparation | Off                |
| Wait for user to start                        | Off                |
| Start measurements                            | Single measurement |

**Routine**

|                    |                     |
|--------------------|---------------------|
| Slab group         | 1                   |
| Slabs              | 1                   |
| Dist. factor       | 20 %                |
| Position           | L0.0 A22.2 F11.5 mm |
| Orientation        | Sagittal            |
| Phase enc. dir.    | A >> P              |
| Phase oversampling | 0 %                 |
| Slice oversampling | 0.0 %               |
| Slices per slab    | 128                 |
| FoV read           | 260 mm              |
| FoV phase          | 100.0 %             |
| Slice thickness    | 1.6 mm              |
| TR                 | 3.25 ms             |
| TE                 | 1.53 ms             |
| Averages           | 1                   |
| Concatenations     | 1                   |
| Filter             | None                |
| Coil elements      | OCC;PFC             |

**Contrast - Common**

|            |         |
|------------|---------|
| TR         | 3.25 ms |
| TE         | 1.53 ms |
| Flip angle | 16 deg  |

**Contrast - Dynamic**

|                |            |
|----------------|------------|
| Averages       | 1          |
| Averaging mode | Short term |
| Reconstruction | Magnitude  |
| Measurements   | 1          |

**Resolution - Common**

|                       |           |
|-----------------------|-----------|
| FoV read              | 260 mm    |
| FoV phase             | 100.0 %   |
| Slice thickness       | 1.6 mm    |
| Base resolution       | 160       |
| Phase resolution      | 100 %     |
| Slice resolution      | 69 %      |
| Phase partial Fourier | 6/8       |
| Slice partial Fourier | 6/8       |
| Trajectory            | Cartesian |

**Resolution - iPAT**

|                  |        |
|------------------|--------|
| PAT mode         | GRAPPA |
| Accel. factor PE | 2      |
| Ref. lines PE    | 24     |
| Accel. factor 3D | 1      |

**Resolution - iPAT**

|                     |            |
|---------------------|------------|
| Reference scan mode | Integrated |
|---------------------|------------|

**Resolution - Filter Image**

|                   |     |
|-------------------|-----|
| Image Filter      | Off |
| Distortion Corr.  | Off |
| Prescan Normalize | Off |
| Normalize         | Off |
| B1 filter         | Off |

**Resolution - Filter Rawdata**

|                   |     |
|-------------------|-----|
| Raw filter        | Off |
| Elliptical filter | Off |

**Geometry - Common**

|                    |                     |
|--------------------|---------------------|
| Slab group         | 1                   |
| Slabs              | 1                   |
| Dist. factor       | 20 %                |
| Position           | L0.0 A22.2 F11.5 mm |
| Orientation        | Sagittal            |
| Phase enc. dir.    | A >> P              |
| Slice oversampling | 0.0 %               |
| Slices per slab    | 128                 |
| FoV read           | 260 mm              |
| FoV phase          | 100.0 %             |
| Slice thickness    | 1.6 mm              |
| TR                 | 3.25 ms             |
| Multi-slice mode   | Sequential          |
| Series             | Ascending           |
| Concatenations     | 1                   |

**Geometry - AutoAlign**

|                     |                     |
|---------------------|---------------------|
| Slab group          | 1                   |
| Position            | L0.0 A22.2 F11.5 mm |
| Orientation         | Sagittal            |
| Phase enc. dir.     | A >> P              |
| Initial Position    | Isocenter           |
| L                   | 0.0 mm              |
| P                   | 0.0 mm              |
| H                   | 0.0 mm              |
| Initial Rotation    | 0.00 deg            |
| Initial Orientation | Transversal         |

**Geometry - Tim Planning Suite**

|                   |      |
|-------------------|------|
| Set-n-Go Protocol | Off  |
| Table position    | H    |
| Table position    | 0 mm |
| Inline Composing  | Off  |

**System - Miscellaneous**

|                     |                      |
|---------------------|----------------------|
| Positioning mode    | REF                  |
| Table position      | H                    |
| Table position      | 0 mm                 |
| MSMA                | S - C - T            |
| Sagittal            | R >> L               |
| Coronal             | A >> P               |
| Transversal         | F >> H               |
| Coil Combine Mode   | Adaptive Combine     |
| Save uncombined     | Off                  |
| Matrix Optimization | Off                  |
| Coil Select Mode    | Off - AutoCoilSelect |

**System - Adjustments**

|                          |          |
|--------------------------|----------|
| B0 Shim mode             | Tune up  |
| B1 Shim mode             | TrueForm |
| Confirm freq. adjustment | Off      |
| Assume Dominant Fat      | Off      |
| Assume Silicone          | Off      |
| Adjustment Tolerance     | Auto     |

**System - Adjust Volume**

|             |             |
|-------------|-------------|
| Position    | Isocenter   |
| Orientation | Transversal |
| Rotation    | 0.00 deg    |
| A >> P      | 263 mm      |
| R >> L      | 350 mm      |
| F >> H      | 350 mm      |
| Reset       | Off         |

**System - Tx/Rx**

|                     |                |
|---------------------|----------------|
| Frequency 1H        | 297.207726 MHz |
| Correction factor   | 1              |
| Gain                | High           |
| Img. Scale Cor.     | 1.000          |
| Reset               | Off            |
| ? Ref. amplitude 1H | 0.000 V        |

**Physio - PACE**

|                |     |
|----------------|-----|
| Resp. control  | Off |
| Concatenations | 1   |

**Inline - Common**

|                |        |
|----------------|--------|
| Flip angle     | 16 deg |
| Measurements   | 1      |
| Time to center | 7.7 s  |

**Inline - Inline**

|                      |     |
|----------------------|-----|
| Subtract             | Off |
| Measurements         | 1   |
| StdDev               | Off |
| Save original images | On  |

**Inline - MIP**

|                      |     |
|----------------------|-----|
| MIP-Sag              | Off |
| MIP-Cor              | Off |
| MIP-Tra              | Off |
| MIP-Time             | Off |
| Save original images | On  |

**Inline - Composing**

|                  |     |
|------------------|-----|
| Inline Composing | Off |
| Distortion Corr. | Off |

**Inline - MapIt**

|                      |         |
|----------------------|---------|
| Save original images | On      |
| MapIt                | None    |
| Flip angle           | 16 deg  |
| Measurements         | 1       |
| Contrasts            | 1       |
| TR                   | 3.25 ms |
| TE                   | 1.53 ms |

**Sequence - Part 1**

|                 |      |
|-----------------|------|
| Introduction    | On   |
| Dimension       | 3D   |
| Asymmetric echo | Weak |

**Sequence - Part 1**

|                  |            |
|------------------|------------|
| Contrasts        | 1          |
| Multi-slice mode | Sequential |
| Bandwidth        | 540 Hz/Px  |

**Sequence - Part 2**

|               |          |
|---------------|----------|
| RF pulse type | Fast     |
| Gradient mode | Normal   |
| Excitation    | Non-sel. |
| RF spoiling   | On       |

**Sequence - Nuclei**

|                       |         |
|-----------------------|---------|
| TX/RX Nucleus         | 1H      |
| TX/RX delta frequency | 0 Hz    |
| TX Nucleus            | None    |
| TX delta frequency    | 0 Hz    |
| Coil elements         | OCC;PFC |

**Sequence - Assistant**

|      |     |
|------|-----|
| Mode | Off |
|------|-----|

\\USER\PHCP\MRS\final\localizer aligned

TA: 0:28 PM: FIX Voxel size: 0.5×0.5×5.0 mmPAT: Off Rel. SNR: 1.00 : qfl

**Properties**

|                                               |                    |
|-----------------------------------------------|--------------------|
| Prio recon                                    | Off                |
| Load images to viewer                         | On                 |
| Inline movie                                  | Off                |
| Auto store images                             | On                 |
| Load images to stamp segments                 | On                 |
| Load images to graphic segments               | On                 |
| Auto open inline display                      | Off                |
| Auto close inline display                     | Off                |
| Start measurement without further preparation | On                 |
| Wait for user to start                        | Off                |
| Start measurements                            | Single measurement |

**Routine**

|                    |                   |
|--------------------|-------------------|
| Slice group        | 1                 |
| Slices             | 5                 |
| Dist. factor       | 400 %             |
| Position           | Isocenter         |
| Orientation        | Coronal           |
| Phase enc. dir.    | R >> L            |
| Slice group        | 2                 |
| Slices             | 5                 |
| Dist. factor       | 600 %             |
| Position           | Isocenter         |
| Orientation        | Transversal       |
| Phase enc. dir.    | L >> R            |
| Slice group        | 3                 |
| Slices             | 5                 |
| Dist. factor       | 300 %             |
| Position           | Isocenter         |
| Orientation        | Sagittal          |
| Phase enc. dir.    | A >> P            |
| AutoAlign          | Head > Brain      |
| Phase oversampling | 0 %               |
| FoV read           | 250 mm            |
| FoV phase          | 100.0 %           |
| Slice thickness    | 5.0 mm            |
| TR                 | 7.6 ms            |
| TE                 | 2.67 ms           |
| Averages           | 1                 |
| Concatenations     | 15                |
| Filter             | Elliptical filter |
| Coil elements      | OCC;PFC           |

**Contrast - Common**

|                   |         |
|-------------------|---------|
| TR                | 7.6 ms  |
| TE                | 2.67 ms |
| TD                | 0 ms    |
| MTC               | Off     |
| Magn. preparation | None    |
| Flip angle        | 10 deg  |
| Fat suppr.        | None    |
| Water suppr.      | None    |
| SWI               | Off     |

**Contrast - Dynamic**

|                |            |
|----------------|------------|
| Averages       | 1          |
| Averaging mode | Short term |
| Reconstruction | Magnitude  |
| Measurements   | 1          |

**Contrast - Dynamic**

|                 |                  |
|-----------------|------------------|
| Multiple series | Each measurement |
|-----------------|------------------|

**Resolution - Common**

|                       |         |
|-----------------------|---------|
| FoV read              | 250 mm  |
| FoV phase             | 100.0 % |
| Slice thickness       | 5.0 mm  |
| Base resolution       | 256     |
| Phase resolution      | 90 %    |
| Phase partial Fourier | Off     |
| Interpolation         | On      |

**Resolution - iPAT**

|          |      |
|----------|------|
| PAT mode | None |
|----------|------|

**Resolution - Filter Image**

|                   |     |
|-------------------|-----|
| Image Filter      | Off |
| Distortion Corr.  | Off |
| Prescan Normalize | Off |
| Normalize         | Off |
| B1 filter         | Off |

**Resolution - Filter Rawdata**

|                   |     |
|-------------------|-----|
| Raw filter        | Off |
| Elliptical filter | On  |

**Geometry - Common**

|                  |             |
|------------------|-------------|
| Slice group      | 1           |
| Slices           | 5           |
| Dist. factor     | 400 %       |
| Position         | Isocenter   |
| Orientation      | Coronal     |
| Phase enc. dir.  | R >> L      |
| Slice group      | 2           |
| Slices           | 5           |
| Dist. factor     | 600 %       |
| Position         | Isocenter   |
| Orientation      | Transversal |
| Phase enc. dir.  | L >> R      |
| Slice group      | 3           |
| Slices           | 5           |
| Dist. factor     | 300 %       |
| Position         | Isocenter   |
| Orientation      | Sagittal    |
| Phase enc. dir.  | A >> P      |
| FoV read         | 250 mm      |
| FoV phase        | 100.0 %     |
| Slice thickness  | 5.0 mm      |
| TR               | 7.6 ms      |
| Multi-slice mode | Sequential  |
| Series           | Interleaved |
| Concatenations   | 15          |

**Geometry - AutoAlign**

|                 |             |
|-----------------|-------------|
| Slice group     | 1           |
| Position        | Isocenter   |
| Orientation     | Coronal     |
| Phase enc. dir. | R >> L      |
| Slice group     | 2           |
| Position        | Isocenter   |
| Orientation     | Transversal |

**Geometry - AutoAlign**

|                     |              |
|---------------------|--------------|
| Phase enc. dir.     | L >> R       |
| Slice group         | 3            |
| Position            | Isocenter    |
| Orientation         | Sagittal     |
| Phase enc. dir.     | A >> P       |
| AutoAlign           | Head > Brain |
| Initial Position    | Isocenter    |
| L                   | 0.0 mm       |
| P                   | 0.0 mm       |
| H                   | 0.0 mm       |
| Initial Rotation    | 0.00 deg     |
| Initial Orientation | Coronal      |

**Geometry - Saturation**

|                 |          |
|-----------------|----------|
| Saturation mode | Standard |
| Fat suppr.      | None     |
| Water suppr.    | None     |
| Special sat.    | None     |

**Geometry - Tim Planning Suite**

|                   |      |
|-------------------|------|
| Set-n-Go Protocol | Off  |
| Table position    | H    |
| Table position    | 0 mm |
| Inline Composing  | Off  |

**Geometry - Tim CT**

|                 |         |
|-----------------|---------|
| Tim CT mode     | Off     |
| Slices          | 5       |
| Slice thickness | 5.0 mm  |
| Dist. factor    | 300 %   |
| FoV read        | 250 mm  |
| FoV phase       | 100.0 % |
| Segments        | 1       |

**System - Miscellaneous**

|                     |                      |
|---------------------|----------------------|
| Positioning mode    | FIX                  |
| Table position      | F                    |
| Table position      | 0 mm                 |
| MSMA                | S - C - T            |
| Sagittal            | R >> L               |
| Coronal             | A >> P               |
| Transversal         | F >> H               |
| Coil Combine Mode   | Adaptive Combine     |
| Save uncombined     | Off                  |
| Matrix Optimization | Off                  |
| AutoAlign           | Head > Brain         |
| Coil Select Mode    | Off - AutoCoilSelect |

**System - Adjustments**

|                          |          |
|--------------------------|----------|
| B0 Shim mode             | Tune up  |
| B1 Shim mode             | TrueForm |
| Confirm freq. adjustment | Off      |
| Assume Dominant Fat      | Off      |
| Assume Silicone          | Off      |
| Adjustment Tolerance     | Auto     |

**System - Adjust Volume**

|             |             |
|-------------|-------------|
| Position    | Isocenter   |
| Orientation | Transversal |
| Rotation    | 0.00 deg    |
| A >> P      | 263 mm      |
| R >> L      | 350 mm      |
| F >> H      | 350 mm      |
| Reset       | Off         |

**System - Tx/Rx**

|                     |                |
|---------------------|----------------|
| Frequency 1H        | 297.207726 MHz |
| Correction factor   | 1              |
| Gain                | High           |
| Img. Scale Cor.     | 1.000          |
| Reset               | Off            |
| ? Ref. amplitude 1H | 0.000 V        |

**Physio - Signal1**

|                 |        |
|-----------------|--------|
| 1st Signal/Mode | None   |
| TR              | 7.6 ms |
| Concatenations  | 15     |
| Segments        | 1      |

**Physio - Cardiac**

|                   |         |
|-------------------|---------|
| Tagging           | None    |
| Magn. preparation | None    |
| Fat suppr.        | None    |
| Dark blood        | Off     |
| FoV read          | 250 mm  |
| FoV phase         | 100.0 % |
| Phase resolution  | 90 %    |

**Physio - PACE**

|                |     |
|----------------|-----|
| Resp. control  | Off |
| Concatenations | 15  |

**Inline - Common**

|                      |     |
|----------------------|-----|
| Subtract             | Off |
| Measurements         | 1   |
| StdDev               | Off |
| Liver registration   | Off |
| Save original images | On  |

**Inline - MIP**

|                      |     |
|----------------------|-----|
| MIP-Sag              | Off |
| MIP-Cor              | Off |
| MIP-Tra              | Off |
| MIP-Time             | Off |
| Save original images | On  |

**Inline - Soft Tissue**

|              |     |
|--------------|-----|
| Wash - In    | Off |
| Wash - Out   | Off |
| TTP          | Off |
| PEI          | Off |
| MIP - time   | Off |
| Measurements | 1   |

**Inline - Composing**

|                  |     |
|------------------|-----|
| Inline Composing | Off |
| Distortion Corr. | Off |

**Inline - MapIt**

|                      |         |
|----------------------|---------|
| Save original images | On      |
| MapIt                | None    |
| Flip angle           | 10 deg  |
| Measurements         | 1       |
| Contrasts            | 1       |
| TR                   | 7.6 ms  |
| TE                   | 2.67 ms |

**Sequence - Part 1**

|              |    |
|--------------|----|
| Introduction | On |
|--------------|----|



**Sequence - Part 1**

|                     |            |
|---------------------|------------|
| Dimension           | 2D         |
| Phase stabilisation | Off        |
| Asymmetric echo     | Allowed    |
| Contrasts           | 1          |
| Flow comp.          | No         |
| Multi-slice mode    | Sequential |
| Bandwidth           | 320 Hz/Px  |

**Sequence - Part 2**

|                          |            |
|--------------------------|------------|
| Segments                 | 1          |
| Acoustic noise reduction | Active     |
| RF pulse type            | Normal     |
| Gradient mode            | Normal     |
| Excitation               | Slice-sel. |
| RF spoiling              | On         |

**Sequence - Nuclei**

|                       |         |
|-----------------------|---------|
| TX/RX Nucleus         | 1H      |
| TX/RX delta frequency | 0 Hz    |
| TX Nucleus            | None    |
| TX delta frequency    | 0 Hz    |
| Coil elements         | OCC;PFC |

**Sequence - Assistant**

|      |     |
|------|-----|
| Mode | Off |
|------|-----|

\\USER\PHCP\MRS\final\t1inplane 64sl occ 1p25iso 2p5sTR 160FOV

TA: 4:02 PM: FIX Voxel size: 1.3×1.3×1.3 mmPAT: Off Rel. SNR: 1.00 : tf

**Properties**

|                                               |                    |
|-----------------------------------------------|--------------------|
| Prio recon                                    | Off                |
| Load images to viewer                         | On                 |
| Inline movie                                  | Off                |
| Auto store images                             | On                 |
| Load images to stamp segments                 | On                 |
| Load images to graphic segments               | On                 |
| Auto open inline display                      | Off                |
| Auto close inline display                     | Off                |
| Start measurement without further preparation | Off                |
| Wait for user to start                        | Off                |
| Start measurements                            | Single measurement |

**Routine**

|                    |                   |
|--------------------|-------------------|
| Slab group         | 1                 |
| Slabs              | 1                 |
| Dist. factor       | 50 %              |
| Position           | L1.8 A1.2 H7.3 mm |
| Orientation        | Sagittal          |
| Phase enc. dir.    | A >> P            |
| AutoAlign          | Head > Brain      |
| Phase oversampling | 0 %               |
| Slice oversampling | 0.0 %             |
| Slices per slab    | 64                |
| FoV read           | 160 mm            |
| FoV phase          | 100.0 %           |
| Slice thickness    | 1.25 mm           |
| TR                 | 2500.0 ms         |
| TE                 | 3.2 ms            |
| Averages           | 1                 |
| Concatenations     | 1                 |
| Filter             | None              |
| Coil elements      | OCC               |

**Contrast - Common**

|                   |             |
|-------------------|-------------|
| TR                | 2500.0 ms   |
| TE                | 3.2 ms      |
| Magn. preparation | Non-sel. IR |
| T1                | 1500 ms     |
| Flip angle        | 5.0 deg     |
| Fat suppr.        | None        |
| Water suppr.      | None        |

**Contrast - Dynamic**

|                 |                  |
|-----------------|------------------|
| Averages        | 1                |
| Averaging mode  | Long term        |
| Reconstruction  | Magnitude        |
| Measurements    | 1                |
| Multiple series | Each measurement |

**Resolution - Common**

|                       |         |
|-----------------------|---------|
| FoV read              | 160 mm  |
| FoV phase             | 100.0 % |
| Slice thickness       | 1.25 mm |
| Base resolution       | 128     |
| Phase resolution      | 100 %   |
| Slice resolution      | 100 %   |
| Phase partial Fourier | 6/8     |
| Slice partial Fourier | Off     |
| Interpolation         | Off     |

**Resolution - iPAT**

|          |      |
|----------|------|
| PAT mode | None |
|----------|------|

**Resolution - Filter Image**

|                   |     |
|-------------------|-----|
| Image Filter      | Off |
| Distortion Corr.  | Off |
| Prescan Normalize | Off |
| Normalize         | Off |
| B1 filter         | Off |

**Resolution - Filter Rawdata**

|                   |     |
|-------------------|-----|
| Raw filter        | Off |
| Elliptical filter | Off |

**Geometry - Common**

|                    |                   |
|--------------------|-------------------|
| Slab group         | 1                 |
| Slabs              | 1                 |
| Dist. factor       | 50 %              |
| Position           | L1.8 A1.2 H7.3 mm |
| Orientation        | Sagittal          |
| Phase enc. dir.    | A >> P            |
| Slice oversampling | 0.0 %             |
| Slices per slab    | 64                |
| FoV read           | 160 mm            |
| FoV phase          | 100.0 %           |
| Slice thickness    | 1.25 mm           |
| TR                 | 2500.0 ms         |
| Multi-slice mode   | Single shot       |
| Series             | Ascending         |
| Concatenations     | 1                 |

**Geometry - AutoAlign**

|                     |                   |
|---------------------|-------------------|
| Slab group          | 1                 |
| Position            | L1.8 A1.2 H7.3 mm |
| Orientation         | Sagittal          |
| Phase enc. dir.     | A >> P            |
| AutoAlign           | Head > Brain      |
| Initial Position    | L1.8 A1.2 H7.3    |
| L                   | 1.8 mm            |
| A                   | 1.2 mm            |
| H                   | 7.3 mm            |
| Initial Rotation    | 0.00 deg          |
| Initial Orientation | Sagittal          |

**Geometry - Navigator****Geometry - Tim Planning Suite**

|                   |      |
|-------------------|------|
| Set-n-Go Protocol | Off  |
| Table position    | H    |
| Table position    | 0 mm |
| Inline Composing  | Off  |

**System - Miscellaneous**

|                   |                  |
|-------------------|------------------|
| Positioning mode  | FIX              |
| Table position    | H                |
| Table position    | 0 mm             |
| MSMA              | S - C - T        |
| Sagittal          | R >> L           |
| Coronal           | A >> P           |
| Transversal       | F >> H           |
| Coil Combine Mode | Adaptive Combine |

**System - Miscellaneous**

|                     |              |
|---------------------|--------------|
| Save uncombined     | Off          |
| Matrix Optimization | Off          |
| AutoAlign           | Head > Brain |
| Coil Select Mode    | Off - All    |

**System - Adjustments**

|                          |          |
|--------------------------|----------|
| B0 Shim mode             | Tune up  |
| B1 Shim mode             | TrueForm |
| Confirm freq. adjustment | Off      |
| Assume Dominant Fat      | Off      |
| Assume Silicone          | Off      |
| Adjustment Tolerance     | Auto     |

**System - Adjust Volume**

|               |                     |
|---------------|---------------------|
| ! Position    | L1.8 P18.8 H15.1 mm |
| ! Orientation | T > C-18.8          |
| ! Rotation    | 0.00 deg            |
| ! A >> P      | 64 mm               |
| ! R >> L      | 148 mm              |
| ! F >> H      | 82 mm               |
| Reset         | Off                 |

**System - Tx/Rx**

|                     |                |
|---------------------|----------------|
| Frequency 1H        | 297.207726 MHz |
| Correction factor   | 1              |
| Gain                | High           |
| Img. Scale Cor.     | 1.000          |
| Reset               | Off            |
| ? Ref. amplitude 1H | 0.000 V        |

**Physio - Signal1**

|                 |           |
|-----------------|-----------|
| 1st Signal/Mode | None      |
| TR              | 2500.0 ms |
| Concatenations  | 1         |

**Physio - Cardiac**

|                   |             |
|-------------------|-------------|
| Magn. preparation | Non-sel. IR |
| T1                | 1500 ms     |
| Fat suppr.        | None        |
| Dark blood        | Off         |
| FoV read          | 160 mm      |
| FoV phase         | 100.0 %     |
| Phase resolution  | 100 %       |

**Physio - PACE**

|                |     |
|----------------|-----|
| Resp. control  | Off |
| Concatenations | 1   |

**Inline - Common**

|                      |     |
|----------------------|-----|
| Subtract             | Off |
| Measurements         | 1   |
| StdDev               | Off |
| Save original images | On  |

**Inline - MIP**

|                      |     |
|----------------------|-----|
| MIP-Sag              | Off |
| MIP-Cor              | Off |
| MIP-Tra              | Off |
| MIP-Time             | Off |
| Save original images | On  |

**Inline - Composing**

|                  |     |
|------------------|-----|
| Inline Composing | Off |
|------------------|-----|

**Inline - Composing**

|                  |     |
|------------------|-----|
| Distortion Corr. | Off |
|------------------|-----|

**Inline - MapIt**

|                      |           |
|----------------------|-----------|
| Save original images | On        |
| MapIt                | None      |
| Flip angle           | 5.0 deg   |
| Measurements         | 1         |
| TR                   | 2500.0 ms |
| TE                   | 3.2 ms    |

**Sequence - Part 1**

|                     |             |
|---------------------|-------------|
| Introduction        | On          |
| Dimension           | 3D          |
| Elliptical scanning | Off         |
| Reordering          | Linear      |
| Asymmetric echo     | Allowed     |
| Flow comp.          | No          |
| Multi-slice mode    | Single shot |
| Echo spacing        | 7.9 ms      |
| Bandwidth           | 180 Hz/Px   |

**Sequence - Part 2**

|                         |           |
|-------------------------|-----------|
| RF pulse type           | Normal    |
| Gradient mode           | Normal    |
| Excitation              | Slab-sel. |
| RF spoiling             | On        |
| Incr. Gradient spoiling | Off       |
| Turbo factor            | 64        |

**Sequence - Nuclei**

|                       |      |
|-----------------------|------|
| TX/RX Nucleus         | 1H   |
| TX/RX delta frequency | 0 Hz |
| TX Nucleus            | None |
| TX delta frequency    | 0 Hz |
| Coil elements         | OCC  |

**Sequence - Assistant**

|      |     |
|------|-----|
| Mode | Off |
|------|-----|

\\USER\PHCP\MRS\final\OCC fastestmap lin

TA: 6.1 s PM: FIX Vol: 18 ×30 ×18 mmRel. SNR: 1.00 : fastmp

**Properties**

|                                               |                    |
|-----------------------------------------------|--------------------|
| Prio recon                                    | Off                |
| Load images to viewer                         | On                 |
| Inline movie                                  | Off                |
| Auto store images                             | On                 |
| Load images to stamp segments                 | Off                |
| Load images to graphic segments               | Off                |
| Auto open inline display                      | On                 |
| Auto close inline display                     | Off                |
| Start measurement without further preparation | Off                |
| Wait for user to start                        | Off                |
| Start measurements                            | Single measurement |

**Routine**

|               |                    |
|---------------|--------------------|
| Position      | L1.2 P49.6 H8.9 mm |
| Orientation   | Transversal        |
| Rotation      | 0 deg              |
| Vol R >> L    | 30 mm              |
| Vol R >> L    | 30 mm              |
| Vol F >> H    | 18 mm              |
| TR            | 2000 ms            |
| TE            | 46.00 ms           |
| Averages      | 1                  |
| Filter        | None               |
| Coil elements | OCC                |

**Contrast**

|                    |          |
|--------------------|----------|
| TR                 | 2000 ms  |
| TE                 | 46.00 ms |
| Tau                | 5.00 ms  |
| Averages           | 1        |
| Excite flip angle  | 90 deg   |
| Refocus flip angle | 180 deg  |
| Measurements       | 1        |

**Resolution - Common**

|             |     |
|-------------|-----|
| Vector size | 256 |
|-------------|-----|

**Geometry - Common**

|             |                    |
|-------------|--------------------|
| Position    | L1.2 P49.6 H8.9 mm |
| Orientation | Transversal        |
| Rotation    | 0 deg              |
| Vol R >> L  | 30 mm              |
| Vol A >> P  | 18 mm              |
| Vol F >> H  | 18 mm              |

**Geometry - AutoAlign**

|                     |                 |
|---------------------|-----------------|
| AutoAlign           | Head > Brain    |
| Initial Position    | L1.2 P49.6 H8.9 |
| L                   | 1.2 mm          |
| P                   | 49.6 mm         |
| H                   | 8.9 mm          |
| Initial Rotation    | 0.00 deg        |
| Initial Orientation | Transversal     |

**System - Miscellaneous**

|                  |           |
|------------------|-----------|
| Positioning mode | FIX       |
| Table position   | H         |
| Table position   | 0 mm      |
| MSMA             | S - C - T |

**System - Miscellaneous**

|                  |                      |
|------------------|----------------------|
| Sagittal         | R >> L               |
| Coronal          | A >> P               |
| Transversal      | F >> H               |
| Save uncombined  | Off                  |
| AutoAlign        | Head > Brain         |
| Coil Select Mode | Off - AutoCoilSelect |

**System - Adjustments**

|                          |          |
|--------------------------|----------|
| B0 Shim mode             | Tune up  |
| B1 Shim mode             | TrueForm |
| Adj. water suppr.        | Off      |
| Confirm freq. adjustment | Off      |
| Assume Dominant Fat      | Off      |
| Assume Silicone          | Off      |
| Adjustment Tolerance     | Auto     |

**System - Adjust Volume**

|             |                    |
|-------------|--------------------|
| Position    | L1.2 P49.6 H8.9 mm |
| Orientation | Transversal        |
| Rotation    | 0.00 deg           |
| A >> P      | 18 mm              |
| R >> L      | 30 mm              |
| F >> H      | 18 mm              |
| Reset       | Off                |

**System - Tx/Rx**

|                     |                |
|---------------------|----------------|
| Frequency 1H        | 297.207726 MHz |
| Correction factor   | 1              |
| Gain                | High           |
| Img. Scale Cor.     | 1.000          |
| Reset               | Off            |
| ? Ref. amplitude 1H | 0.000 V        |

**Physio - Signal1**

|                 |         |
|-----------------|---------|
| 1st Signal/Mode | None    |
| TR              | 2000 ms |

**Sequence - Common**

|                      |           |
|----------------------|-----------|
| Delta frequency      | 0.0 ppm   |
| Phase cycling        | None      |
| Bandwidth            | 100000 Hz |
| Acquisition duration | 2 ms      |

**Sequence - Special**

|                         |                             |
|-------------------------|-----------------------------|
| Type of fit             | Linear 3-proj               |
| Vol fit factor          | 100 %                       |
| Force spherical fit Vol | Off Force spherical fit Vol |
| Save plots to database  | Off                         |
| Refocus pulses          | Normal                      |
| Excite pulse duration   | 6400 us                     |
| Refocus pulse duration  | 5120 us                     |
| Bar FoV                 | 384 mm                      |
| Bar thickness           | 10.0 mm                     |
| Inversion pulse         | Off                         |
| Multi-echo acquisition  | On                          |
| Number of echoes        | 4                           |

\\USER\PHCP\MRS\final\OCC fastestmap all

TA: 0:12 PM: FIX Vol: 18 ×30 ×18 mmRel. SNR: 1.00 : fastmp

**Properties**

|                                               |                    |
|-----------------------------------------------|--------------------|
| Prio recon                                    | Off                |
| Load images to viewer                         | On                 |
| Inline movie                                  | Off                |
| Auto store images                             | On                 |
| Load images to stamp segments                 | Off                |
| Load images to graphic segments               | Off                |
| Auto open inline display                      | On                 |
| Auto close inline display                     | Off                |
| Start measurement without further preparation | Off                |
| Wait for user to start                        | Off                |
| Start measurements                            | Single measurement |

**Routine**

|               |                    |
|---------------|--------------------|
| Position      | L1.2 P49.6 H8.9 mm |
| Orientation   | Transversal        |
| Rotation      | 0 deg              |
| Vol R >> L    | 30 mm              |
| Vol R >> L    | 30 mm              |
| Vol F >> H    | 18 mm              |
| TR            | 2000 ms            |
| TE            | 46.00 ms           |
| Averages      | 1                  |
| Filter        | None               |
| Coil elements | OCC                |

**Contrast**

|                    |          |
|--------------------|----------|
| TR                 | 2000 ms  |
| TE                 | 46.00 ms |
| Tau                | 5.00 ms  |
| Averages           | 1        |
| Excite flip angle  | 90 deg   |
| Refocus flip angle | 180 deg  |
| Measurements       | 1        |

**Resolution - Common**

|             |     |
|-------------|-----|
| Vector size | 256 |
|-------------|-----|

**Geometry - Common**

|             |                    |
|-------------|--------------------|
| Position    | L1.2 P49.6 H8.9 mm |
| Orientation | Transversal        |
| Rotation    | 0 deg              |
| Vol R >> L  | 30 mm              |
| Vol A >> P  | 18 mm              |
| Vol F >> H  | 18 mm              |

**Geometry - AutoAlign**

|                     |                 |
|---------------------|-----------------|
| AutoAlign           | Head > Brain    |
| Initial Position    | L1.2 P49.6 H8.9 |
| L                   | 1.2 mm          |
| P                   | 49.6 mm         |
| H                   | 8.9 mm          |
| Initial Rotation    | 0.00 deg        |
| Initial Orientation | Transversal     |

**System - Miscellaneous**

|                  |           |
|------------------|-----------|
| Positioning mode | FIX       |
| Table position   | H         |
| Table position   | 0 mm      |
| MSMA             | S - C - T |

**System - Miscellaneous**

|                  |                      |
|------------------|----------------------|
| Sagittal         | R >> L               |
| Coronal          | A >> P               |
| Transversal      | F >> H               |
| Save uncombined  | Off                  |
| AutoAlign        | Head > Brain         |
| Coil Select Mode | Off - AutoCoilSelect |

**System - Adjustments**

|                          |          |
|--------------------------|----------|
| B0 Shim mode             | Tune up  |
| B1 Shim mode             | TrueForm |
| Adj. water suppr.        | Off      |
| Confirm freq. adjustment | Off      |
| Assume Dominant Fat      | Off      |
| Assume Silicone          | Off      |
| Adjustment Tolerance     | Auto     |

**System - Adjust Volume**

|             |                    |
|-------------|--------------------|
| Position    | L1.2 P49.6 H8.9 mm |
| Orientation | Transversal        |
| Rotation    | 0.00 deg           |
| A >> P      | 18 mm              |
| R >> L      | 30 mm              |
| F >> H      | 18 mm              |
| Reset       | Off                |

**System - Tx/Rx**

|                     |                |
|---------------------|----------------|
| Frequency 1H        | 297.207726 MHz |
| Correction factor   | 1              |
| Gain                | High           |
| Img. Scale Cor.     | 1.000          |
| Reset               | Off            |
| ? Ref. amplitude 1H | 0.000 V        |

**Physio - Signal1**

|                 |         |
|-----------------|---------|
| 1st Signal/Mode | None    |
| TR              | 2000 ms |

**Sequence - Common**

|                      |           |
|----------------------|-----------|
| Delta frequency      | 0.0 ppm   |
| Phase cycling        | None      |
| Bandwidth            | 100000 Hz |
| Acquisition duration | 2 ms      |

**Sequence - Special**

|                         |                             |
|-------------------------|-----------------------------|
| Type of fit             | Full 6-proj                 |
| Vol fit factor          | 100 %                       |
| Force spherical fit Vol | Off Force spherical fit Vol |
| Save plots to database  | Off                         |
| Refocus pulses          | Normal                      |
| Excite pulse duration   | 6400 us                     |
| Refocus pulse duration  | 5120 us                     |
| Bar FoV                 | 384 mm                      |
| Bar thickness           | 10.0 mm                     |
| Inversion pulse         | Off                         |
| Multi-echo acquisition  | On                          |
| Number of echoes        | 4                           |

\\USER\PHCP\MRS\final\OCC fastestmap all

TA: 0:12 PM: FIX Vol: 18 ×30 ×18 mmRel. SNR: 1.00 : fastmp

**Properties**

|                                               |                    |
|-----------------------------------------------|--------------------|
| Prio recon                                    | Off                |
| Load images to viewer                         | On                 |
| Inline movie                                  | Off                |
| Auto store images                             | On                 |
| Load images to stamp segments                 | Off                |
| Load images to graphic segments               | Off                |
| Auto open inline display                      | Off                |
| Auto close inline display                     | Off                |
| Start measurement without further preparation | Off                |
| Wait for user to start                        | Off                |
| Start measurements                            | Single measurement |

**Routine**

|               |                    |
|---------------|--------------------|
| Position      | L1.2 P49.6 H8.9 mm |
| Orientation   | Transversal        |
| Rotation      | 0 deg              |
| Vol R >> L    | 30 mm              |
| Vol R >> L    | 30 mm              |
| Vol F >> H    | 18 mm              |
| TR            | 2000 ms            |
| TE            | 46.00 ms           |
| Averages      | 1                  |
| Filter        | None               |
| Coil elements | OCC                |

**Contrast**

|                    |          |
|--------------------|----------|
| TR                 | 2000 ms  |
| TE                 | 46.00 ms |
| Tau                | 5.00 ms  |
| Averages           | 1        |
| Excite flip angle  | 90 deg   |
| Refocus flip angle | 180 deg  |
| Measurements       | 1        |

**Resolution - Common**

|             |     |
|-------------|-----|
| Vector size | 256 |
|-------------|-----|

**Geometry - Common**

|             |                    |
|-------------|--------------------|
| Position    | L1.2 P49.6 H8.9 mm |
| Orientation | Transversal        |
| Rotation    | 0 deg              |
| Vol R >> L  | 30 mm              |
| Vol A >> P  | 18 mm              |
| Vol F >> H  | 18 mm              |

**Geometry - AutoAlign**

|                     |                 |
|---------------------|-----------------|
| AutoAlign           | Head > Brain    |
| Initial Position    | L1.2 P49.6 H8.9 |
| L                   | 1.2 mm          |
| P                   | 49.6 mm         |
| H                   | 8.9 mm          |
| Initial Rotation    | 0.00 deg        |
| Initial Orientation | Transversal     |

**System - Miscellaneous**

|                  |           |
|------------------|-----------|
| Positioning mode | FIX       |
| Table position   | H         |
| Table position   | 0 mm      |
| MSMA             | S - C - T |

**System - Miscellaneous**

|                  |                      |
|------------------|----------------------|
| Sagittal         | R >> L               |
| Coronal          | A >> P               |
| Transversal      | F >> H               |
| Save uncombined  | Off                  |
| AutoAlign        | Head > Brain         |
| Coil Select Mode | Off - AutoCoilSelect |

**System - Adjustments**

|                          |          |
|--------------------------|----------|
| B0 Shim mode             | Tune up  |
| B1 Shim mode             | TrueForm |
| Adj. water suppr.        | Off      |
| Confirm freq. adjustment | Off      |
| Assume Dominant Fat      | Off      |
| Assume Silicone          | Off      |
| Adjustment Tolerance     | Auto     |

**System - Adjust Volume**

|             |                    |
|-------------|--------------------|
| Position    | L1.2 P49.6 H8.9 mm |
| Orientation | Transversal        |
| Rotation    | 0.00 deg           |
| A >> P      | 18 mm              |
| R >> L      | 30 mm              |
| F >> H      | 18 mm              |
| Reset       | Off                |

**System - Tx/Rx**

|                     |                |
|---------------------|----------------|
| Frequency 1H        | 297.207726 MHz |
| Correction factor   | 1              |
| Gain                | High           |
| Img. Scale Cor.     | 1.000          |
| Reset               | Off            |
| ? Ref. amplitude 1H | 0.000 V        |

**Physio - Signal1**

|                 |         |
|-----------------|---------|
| 1st Signal/Mode | None    |
| TR              | 2000 ms |

**Sequence - Common**

|                      |           |
|----------------------|-----------|
| Delta frequency      | 0.0 ppm   |
| Phase cycling        | None      |
| Bandwidth            | 100000 Hz |
| Acquisition duration | 2 ms      |

**Sequence - Special**

|                         |                             |
|-------------------------|-----------------------------|
| Type of fit             | Full 6-proj                 |
| Vol fit factor          | 100 %                       |
| Force spherical fit Vol | Off Force spherical fit Vol |
| Save plots to database  | Off                         |
| Refocus pulses          | Normal                      |
| Excite pulse duration   | 6400 us                     |
| Refocus pulse duration  | 5120 us                     |
| Bar FoV                 | 384 mm                      |
| Bar thickness           | 10.0 mm                     |
| Inversion pulse         | Off                         |
| Multi-echo acquisition  | On                          |
| Number of echoes        | 4                           |

\\USER\PHCP\MRS\final\OCC fastestmap all

TA: 0:12 PM: FIX Vol: 18 ×30 ×18 mmRel. SNR: 1.00 : fastmp

**Properties**

|                                               |                    |
|-----------------------------------------------|--------------------|
| Prio recon                                    | Off                |
| Load images to viewer                         | On                 |
| Inline movie                                  | Off                |
| Auto store images                             | On                 |
| Load images to stamp segments                 | Off                |
| Load images to graphic segments               | Off                |
| Auto open inline display                      | Off                |
| Auto close inline display                     | Off                |
| Start measurement without further preparation | Off                |
| Wait for user to start                        | Off                |
| Start measurements                            | Single measurement |

**Routine**

|               |                    |
|---------------|--------------------|
| Position      | L1.2 P49.6 H8.9 mm |
| Orientation   | Transversal        |
| Rotation      | 0 deg              |
| Vol R >> L    | 30 mm              |
| Vol R >> L    | 30 mm              |
| Vol F >> H    | 18 mm              |
| TR            | 2000 ms            |
| TE            | 46.00 ms           |
| Averages      | 1                  |
| Filter        | None               |
| Coil elements | OCC                |

**Contrast**

|                    |          |
|--------------------|----------|
| TR                 | 2000 ms  |
| TE                 | 46.00 ms |
| Tau                | 5.00 ms  |
| Averages           | 1        |
| Excite flip angle  | 90 deg   |
| Refocus flip angle | 180 deg  |
| Measurements       | 1        |

**Resolution - Common**

|             |     |
|-------------|-----|
| Vector size | 256 |
|-------------|-----|

**Geometry - Common**

|             |                    |
|-------------|--------------------|
| Position    | L1.2 P49.6 H8.9 mm |
| Orientation | Transversal        |
| Rotation    | 0 deg              |
| Vol R >> L  | 30 mm              |
| Vol A >> P  | 18 mm              |
| Vol F >> H  | 18 mm              |

**Geometry - AutoAlign**

|                     |                 |
|---------------------|-----------------|
| AutoAlign           | Head > Brain    |
| Initial Position    | L1.2 P49.6 H8.9 |
| L                   | 1.2 mm          |
| P                   | 49.6 mm         |
| H                   | 8.9 mm          |
| Initial Rotation    | 0.00 deg        |
| Initial Orientation | Transversal     |

**System - Miscellaneous**

|                  |           |
|------------------|-----------|
| Positioning mode | FIX       |
| Table position   | H         |
| Table position   | 0 mm      |
| MSMA             | S - C - T |

**System - Miscellaneous**

|                  |                      |
|------------------|----------------------|
| Sagittal         | R >> L               |
| Coronal          | A >> P               |
| Transversal      | F >> H               |
| Save uncombined  | Off                  |
| AutoAlign        | Head > Brain         |
| Coil Select Mode | Off - AutoCoilSelect |

**System - Adjustments**

|                          |          |
|--------------------------|----------|
| B0 Shim mode             | Tune up  |
| B1 Shim mode             | TrueForm |
| Adj. water suppr.        | Off      |
| Confirm freq. adjustment | Off      |
| Assume Dominant Fat      | Off      |
| Assume Silicone          | Off      |
| Adjustment Tolerance     | Auto     |

**System - Adjust Volume**

|             |                    |
|-------------|--------------------|
| Position    | L1.2 P49.6 H8.9 mm |
| Orientation | Transversal        |
| Rotation    | 0.00 deg           |
| A >> P      | 18 mm              |
| R >> L      | 30 mm              |
| F >> H      | 18 mm              |
| Reset       | Off                |

**System - Tx/Rx**

|                     |                |
|---------------------|----------------|
| Frequency 1H        | 297.207726 MHz |
| Correction factor   | 1              |
| Gain                | High           |
| Img. Scale Cor.     | 1.000          |
| Reset               | Off            |
| ? Ref. amplitude 1H | 0.000 V        |

**Physio - Signal1**

|                 |         |
|-----------------|---------|
| 1st Signal/Mode | None    |
| TR              | 2000 ms |

**Sequence - Common**

|                      |           |
|----------------------|-----------|
| Delta frequency      | 0.0 ppm   |
| Phase cycling        | None      |
| Bandwidth            | 100000 Hz |
| Acquisition duration | 2 ms      |

**Sequence - Special**

|                         |                             |
|-------------------------|-----------------------------|
| Type of fit             | Full 6-proj                 |
| Vol fit factor          | 100 %                       |
| Force spherical fit Vol | Off Force spherical fit Vol |
| Save plots to database  | Off                         |
| Refocus pulses          | Normal                      |
| Excite pulse duration   | 6400 us                     |
| Refocus pulse duration  | 5120 us                     |
| Bar FoV                 | 384 mm                      |
| Bar thickness           | 10.0 mm                     |
| Inversion pulse         | Off                         |
| Multi-echo acquisition  | On                          |
| Number of echoes        | 4                           |

\\USER\PHCP\MRS\final\OCC fastestmap lin6

TA: 0:24 PM: FIX Vol: 18 ×30 ×18 mmRel. SNR: 1.00 : fastmp

**Properties**

|                                               |                    |
|-----------------------------------------------|--------------------|
| Prio recon                                    | Off                |
| Load images to viewer                         | On                 |
| Inline movie                                  | Off                |
| Auto store images                             | On                 |
| Load images to stamp segments                 | Off                |
| Load images to graphic segments               | Off                |
| Auto open inline display                      | On                 |
| Auto close inline display                     | Off                |
| Start measurement without further preparation | Off                |
| Wait for user to start                        | Off                |
| Start measurements                            | Single measurement |

**Routine**

|               |                    |
|---------------|--------------------|
| Position      | L1.2 P49.6 H8.9 mm |
| Orientation   | Transversal        |
| Rotation      | 0 deg              |
| Vol R >> L    | 30 mm              |
| Vol R >> L    | 30 mm              |
| Vol F >> H    | 18 mm              |
| TR            | 2000 ms            |
| TE            | 46.00 ms           |
| Averages      | 1                  |
| Filter        | None               |
| Coil elements | OCC                |

**Contrast**

|                    |          |
|--------------------|----------|
| TR                 | 2000 ms  |
| TE                 | 46.00 ms |
| Tau                | 20.00 ms |
| Averages           | 1        |
| Excite flip angle  | 90 deg   |
| Refocus flip angle | 180 deg  |
| Measurements       | 1        |

**Resolution - Common**

|             |     |
|-------------|-----|
| Vector size | 256 |
|-------------|-----|

**Geometry - Common**

|             |                    |
|-------------|--------------------|
| Position    | L1.2 P49.6 H8.9 mm |
| Orientation | Transversal        |
| Rotation    | 0 deg              |
| Vol R >> L  | 30 mm              |
| Vol A >> P  | 18 mm              |
| Vol F >> H  | 18 mm              |

**Geometry - AutoAlign**

|                     |                 |
|---------------------|-----------------|
| AutoAlign           | Head > Brain    |
| Initial Position    | L1.2 P49.6 H8.9 |
| L                   | 1.2 mm          |
| P                   | 49.6 mm         |
| H                   | 8.9 mm          |
| Initial Rotation    | 0.00 deg        |
| Initial Orientation | Transversal     |

**System - Miscellaneous**

|                  |           |
|------------------|-----------|
| Positioning mode | FIX       |
| Table position   | H         |
| Table position   | 0 mm      |
| MSMA             | S - C - T |

**System - Miscellaneous**

|                  |                      |
|------------------|----------------------|
| Sagittal         | R >> L               |
| Coronal          | A >> P               |
| Transversal      | F >> H               |
| Save uncombined  | Off                  |
| AutoAlign        | Head > Brain         |
| Coil Select Mode | Off - AutoCoilSelect |

**System - Adjustments**

|                          |          |
|--------------------------|----------|
| B0 Shim mode             | Tune up  |
| B1 Shim mode             | TrueForm |
| Adj. water suppr.        | Off      |
| Confirm freq. adjustment | Off      |
| Assume Dominant Fat      | Off      |
| Assume Silicone          | Off      |
| Adjustment Tolerance     | Auto     |

**System - Adjust Volume**

|             |                    |
|-------------|--------------------|
| Position    | L1.2 P49.6 H8.9 mm |
| Orientation | Transversal        |
| Rotation    | 0.00 deg           |
| A >> P      | 18 mm              |
| R >> L      | 30 mm              |
| F >> H      | 18 mm              |
| Reset       | Off                |

**System - Tx/Rx**

|                     |                |
|---------------------|----------------|
| Frequency 1H        | 297.207726 MHz |
| Correction factor   | 1              |
| Gain                | High           |
| Img. Scale Cor.     | 1.000          |
| Reset               | Off            |
| ? Ref. amplitude 1H | 0.000 V        |

**Physio - Signal1**

|                 |         |
|-----------------|---------|
| 1st Signal/Mode | None    |
| TR              | 2000 ms |

**Sequence - Common**

|                      |           |
|----------------------|-----------|
| Delta frequency      | 0.0 ppm   |
| Phase cycling        | None      |
| Bandwidth            | 100000 Hz |
| Acquisition duration | 2 ms      |

**Sequence - Special**

|                         |                             |
|-------------------------|-----------------------------|
| Type of fit             | Linear 6-proj               |
| Vol fit factor          | 100 %                       |
| Force spherical fit Vol | Off Force spherical fit Vol |
| Save plots to database  | Off                         |
| Refocus pulses          | Normal                      |
| Excite pulse duration   | 6400 us                     |
| Refocus pulse duration  | 5120 us                     |
| Bar FoV                 | 384 mm                      |
| Bar thickness           | 10.0 mm                     |
| Inversion pulse         | Off                         |
| Multi-echo acquisition  | Off                         |



## \USER\PHCP\MRS\final\OCC linewidth check

TA: 0:23 PM: FIX Vol: 18 ×30 ×18 mmRel. SNR: 1.00 : steam

**Properties**

|                                               |                    |
|-----------------------------------------------|--------------------|
| Prio recon                                    | Off                |
| Load images to viewer                         | On                 |
| Inline movie                                  | Off                |
| Auto store images                             | On                 |
| Load images to stamp segments                 | Off                |
| Load images to graphic segments               | Off                |
| Auto open inline display                      | Off                |
| Auto close inline display                     | Off                |
| Start measurement without further preparation | Off                |
| Wait for user to start                        | Off                |
| Start measurements                            | Single measurement |

**Routine**

|               |                    |
|---------------|--------------------|
| Position      | L1.2 P49.6 H8.9 mm |
| Orientation   | Transversal        |
| Rotation      | 0 deg              |
| Vol R >> L    | 30 mm              |
| Vol R >> L    | 30 mm              |
| Vol F >> H    | 18 mm              |
| TR            | 5000 ms            |
| TE            | 8.00 ms            |
| Averages      | 1                  |
| Filter        | None               |
| Coil elements | OCC                |

**Contrast**

|                     |              |
|---------------------|--------------|
| TR                  | 5000 ms      |
| TE                  | 8.00 ms      |
| TM                  | 32.00 ms     |
| Averages            | 1            |
| Flip angle          | 90 deg       |
| VAPOR               | Only RF off  |
| VAPOR suppr.        | Water suppr. |
| Water s. BW         | 135 Hz       |
| Water s. delta pos. | 0.00 ppm     |
| Measurements        | 1            |

**Resolution - Common**

|             |      |
|-------------|------|
| Vector size | 2048 |
|-------------|------|

**Geometry - Common**

|             |                    |
|-------------|--------------------|
| Position    | L1.2 P49.6 H8.9 mm |
| Orientation | Transversal        |
| Rotation    | 0 deg              |
| Vol R >> L  | 30 mm              |
| Vol A >> P  | 18 mm              |
| Vol F >> H  | 18 mm              |

**Geometry - AutoAlign**

|                     |                 |
|---------------------|-----------------|
| AutoAlign           | Head > Brain    |
| Initial Position    | L1.2 P49.6 H8.9 |
| L                   | 1.2 mm          |
| P                   | 49.6 mm         |
| H                   | 8.9 mm          |
| Initial Rotation    | 0.00 deg        |
| Initial Orientation | Transversal     |

**System - Miscellaneous**

|                  |     |
|------------------|-----|
| Positioning mode | FIX |
|------------------|-----|

**System - Miscellaneous**

|                  |                      |
|------------------|----------------------|
| Table position   | H                    |
| Table position   | 0 mm                 |
| MSMA             | S - C - T            |
| Sagittal         | R >> L               |
| Coronal          | A >> P               |
| Transversal      | F >> H               |
| Save uncombined  | Off                  |
| AutoAlign        | Head > Brain         |
| Coil Select Mode | Off - AutoCoilSelect |

**System - Adjustments**

|                          |          |
|--------------------------|----------|
| B0 Shim mode             | Brain    |
| B1 Shim mode             | TrueForm |
| Adj. water suppr.        | Off      |
| Confirm freq. adjustment | Off      |
| Assume Dominant Fat      | Off      |
| Assume Silicone          | Off      |
| Adjustment Tolerance     | Auto     |

**System - Adjust Volume**

|             |                    |
|-------------|--------------------|
| Position    | L1.2 P49.6 H8.9 mm |
| Orientation | Transversal        |
| Rotation    | 0.00 deg           |
| A >> P      | 18 mm              |
| R >> L      | 30 mm              |
| F >> H      | 18 mm              |
| Reset       | Off                |

**System - Tx/Rx**

|                     |                |
|---------------------|----------------|
| Frequency 1H        | 297.207726 MHz |
| Correction factor   | 1              |
| Gain                | High           |
| Img. Scale Cor.     | 1.000          |
| Reset               | Off            |
| ? Ref. amplitude 1H | 0.000 V        |

**Physio - Signal1**

|                 |         |
|-----------------|---------|
| 1st Signal/Mode | None    |
| TR              | 5000 ms |

**Sequence - Common**

|                      |         |
|----------------------|---------|
| Introduction         | On      |
| Preparation scans    | 2       |
| Delta frequency      | 0.0 ppm |
| Phase cycling        | Auto    |
| Bandwidth            | 6000 Hz |
| Acquisition duration | 341 ms  |
| Remove oversampling  | On      |

**Sequence - Nuclei**

|                       |      |
|-----------------------|------|
| TX/RX Nucleus         | 1H   |
| TX/RX delta frequency | 0 Hz |
| TX Nucleus            | None |
| TX delta frequency    | 0 Hz |
| Coil elements         | OCC  |

**Sequence - Special**

|                        |           |
|------------------------|-----------|
| RF pulse duration      | 1280 us   |
| Spoiler max. amplitude | 30.0 mT/m |
| Refocus grad. factor   | 1.00      |

**Sequence - Special**

|                      |          |
|----------------------|----------|
| OVS slab thickness   | 100.0 mm |
| OVS slab pos. offset | 5.0 mm   |
| Spoiler duration     | 1500 us  |
| Acq. window shift    | 200 us   |
| Min. settling delay  | 100 us   |
| Gradient ramp time   | 200 us   |
| VAPOR flip angle     | 60 deg   |
| VAPOR delay 8        | 16 ms    |
| VAPOR delay 7        | 66 ms    |
| OVS pulse duration   | 2560 us  |
| OVS flip angle RO    | 90 deg   |
| OVS flip angle PH    | 90 deg   |
| OVS flip angle SL    | 90 deg   |
| VAPOR delay 6        | 71 ms    |
| VAPOR delay 5        | 112 ms   |
| VAPOR delay 4        | 115 ms   |
| VAPOR delay 3        | 132 ms   |
| VAPOR delay 2        | 110 ms   |
| VAPOR delay 1        | 160 ms   |
| Enable OVS           | On       |
| Send ref. scans      | Off      |
| Inversion pulse      | Off      |
| Symmetric RF pulses  | On       |
| Invert SS grad. pol. | Off      |
| Shift RO frequency   | Off      |
| Debug loop type      | None     |

\\USER\PHCP\MRS\final\OCC steam eja cal fa 50 10 7

TA: 0:53 PM: FIX Vol: 18 ×30 ×18 mmRel. SNR: 1.00 : steam

**Properties**

|                                               |                    |
|-----------------------------------------------|--------------------|
| Prio recon                                    | Off                |
| Load images to viewer                         | On                 |
| Inline movie                                  | Off                |
| Auto store images                             | On                 |
| Load images to stamp segments                 | Off                |
| Load images to graphic segments               | Off                |
| Auto open inline display                      | On                 |
| Auto close inline display                     | Off                |
| Start measurement without further preparation | Off                |
| Wait for user to start                        | Off                |
| Start measurements                            | Single measurement |

**Routine**

|               |                    |
|---------------|--------------------|
| Position      | L1.2 P49.6 H8.9 mm |
| Orientation   | Transversal        |
| Rotation      | 0 deg              |
| Vol R >> L    | 30 mm              |
| Vol R >> L    | 30 mm              |
| Vol F >> H    | 18 mm              |
| TR            | 5000 ms            |
| TE            | 8.00 ms            |
| Averages      | 1                  |
| Filter        | None               |
| Coil elements | OCC                |

**Contrast**

|                     |              |
|---------------------|--------------|
| TR                  | 5000 ms      |
| TE                  | 8.00 ms      |
| TM                  | 32.00 ms     |
| Averages            | 1            |
| Flip angle          | 50 deg       |
| VAPOR               | Only RF off  |
| VAPOR suppr.        | Water suppr. |
| Water s. BW         | 135 Hz       |
| Water s. delta pos. | 0.00 ppm     |
| Measurements        | 7            |

**Resolution - Common**

|             |      |
|-------------|------|
| Vector size | 2048 |
|-------------|------|

**Geometry - Common**

|             |                    |
|-------------|--------------------|
| Position    | L1.2 P49.6 H8.9 mm |
| Orientation | Transversal        |
| Rotation    | 0 deg              |
| Vol R >> L  | 30 mm              |
| Vol A >> P  | 18 mm              |
| Vol F >> H  | 18 mm              |

**Geometry - AutoAlign**

|                     |                 |
|---------------------|-----------------|
| AutoAlign           | Head > Brain    |
| Initial Position    | L1.2 P49.6 H8.9 |
| L                   | 1.2 mm          |
| P                   | 49.6 mm         |
| H                   | 8.9 mm          |
| Initial Rotation    | 0.00 deg        |
| Initial Orientation | Transversal     |

**System - Miscellaneous**

|                  |     |
|------------------|-----|
| Positioning mode | FIX |
|------------------|-----|

**System - Miscellaneous**

|                  |                      |
|------------------|----------------------|
| Table position   | H                    |
| Table position   | 0 mm                 |
| MSMA             | S - C - T            |
| Sagittal         | R >> L               |
| Coronal          | A >> P               |
| Transversal      | F >> H               |
| Save uncombined  | Off                  |
| AutoAlign        | Head > Brain         |
| Coil Select Mode | Off - AutoCoilSelect |

**System - Adjustments**

|                          |          |
|--------------------------|----------|
| B0 Shim mode             | Brain    |
| B1 Shim mode             | TrueForm |
| Adj. water suppr.        | Off      |
| Confirm freq. adjustment | Off      |
| Assume Dominant Fat      | Off      |
| Assume Silicone          | Off      |
| Adjustment Tolerance     | Auto     |

**System - Adjust Volume**

|             |                    |
|-------------|--------------------|
| Position    | L1.2 P49.6 H8.9 mm |
| Orientation | Transversal        |
| Rotation    | 0.00 deg           |
| A >> P      | 18 mm              |
| R >> L      | 30 mm              |
| F >> H      | 18 mm              |
| Reset       | Off                |

**System - Tx/Rx**

|                     |                |
|---------------------|----------------|
| Frequency 1H        | 297.207726 MHz |
| Correction factor   | 1              |
| Gain                | High           |
| Img. Scale Cor.     | 1.000          |
| Reset               | Off            |
| ? Ref. amplitude 1H | 0.000 V        |

**Physio - Signal1**

|                 |         |
|-----------------|---------|
| 1st Signal/Mode | None    |
| TR              | 5000 ms |

**Sequence - Common**

|                      |         |
|----------------------|---------|
| Introduction         | On      |
| Preparation scans    | 2       |
| Delta frequency      | 0.0 ppm |
| Phase cycling        | Auto    |
| Bandwidth            | 6000 Hz |
| Acquisition duration | 341 ms  |
| Remove oversampling  | On      |

**Sequence - Nuclei**

|                       |      |
|-----------------------|------|
| TX/RX Nucleus         | 1H   |
| TX/RX delta frequency | 0 Hz |
| TX Nucleus            | None |
| TX delta frequency    | 0 Hz |
| Coil elements         | OCC  |

**Sequence - Special**

|                        |           |
|------------------------|-----------|
| RF pulse duration      | 1520 us   |
| Spoiler max. amplitude | 30.0 mT/m |
| Refocus grad. factor   | 1.00      |

**Sequence - Special**

|                      |            |
|----------------------|------------|
| OVS slab thickness   | 100.0 mm   |
| OVS slab pos. offset | 5.0 mm     |
| Spoiler duration     | 1500 us    |
| Acq. window shift    | 200 us     |
| Min. settling delay  | 100 us     |
| Gradient ramp time   | 200 us     |
| VAPOR flip angle     | 60 deg     |
| VAPOR delay 8        | 16 ms      |
| VAPOR delay 7        | 66 ms      |
| OVS pulse duration   | 2560 us    |
| OVS flip angle RO    | 90 deg     |
| OVS flip angle PH    | 90 deg     |
| OVS flip angle SL    | 90 deg     |
| VAPOR delay 6        | 71 ms      |
| VAPOR delay 5        | 112 ms     |
| VAPOR delay 4        | 115 ms     |
| VAPOR delay 3        | 132 ms     |
| VAPOR delay 2        | 110 ms     |
| VAPOR delay 1        | 160 ms     |
| Enable OVS           | On         |
| Weighted averages    | Off        |
| Send ref. scans      | Off        |
| Inversion pulse      | Off        |
| Symmetric RF pulses  | On         |
| Invert SS grad. pol. | Off        |
| Shift RO frequency   | Off        |
| Debug loop type      | Flip angle |
| Flip angle inc.      | 10 deg     |
| Measurements         | 7          |

\\USER\PHCP\MRS\final\OCC steam eja cal fa 80 3 10

TA: 1:08 PM: FIX Vol: 18 ×30 ×18 mmRel. SNR: 1.00 : steam

**Properties**

|                                               |                    |
|-----------------------------------------------|--------------------|
| Prio recon                                    | Off                |
| Load images to viewer                         | On                 |
| Inline movie                                  | Off                |
| Auto store images                             | On                 |
| Load images to stamp segments                 | Off                |
| Load images to graphic segments               | Off                |
| Auto open inline display                      | Off                |
| Auto close inline display                     | Off                |
| Start measurement without further preparation | Off                |
| Wait for user to start                        | Off                |
| Start measurements                            | Single measurement |

**Routine**

|               |                    |
|---------------|--------------------|
| Position      | L1.2 P49.6 H8.9 mm |
| Orientation   | Transversal        |
| Rotation      | 0 deg              |
| Vol R >> L    | 30 mm              |
| Vol R >> L    | 30 mm              |
| Vol F >> H    | 18 mm              |
| TR            | 5000 ms            |
| TE            | 8.00 ms            |
| Averages      | 1                  |
| Filter        | None               |
| Coil elements | OCC                |

**Contrast**

|                     |              |
|---------------------|--------------|
| TR                  | 5000 ms      |
| TE                  | 8.00 ms      |
| TM                  | 32.00 ms     |
| Averages            | 1            |
| Flip angle          | 80 deg       |
| VAPOR               | Only RF off  |
| VAPOR suppr.        | Water suppr. |
| Water s. BW         | 135 Hz       |
| Water s. delta pos. | 0.00 ppm     |
| Measurements        | 10           |

**Resolution - Common**

|             |      |
|-------------|------|
| Vector size | 2048 |
|-------------|------|

**Geometry - Common**

|             |                    |
|-------------|--------------------|
| Position    | L1.2 P49.6 H8.9 mm |
| Orientation | Transversal        |
| Rotation    | 0 deg              |
| Vol R >> L  | 30 mm              |
| Vol A >> P  | 18 mm              |
| Vol F >> H  | 18 mm              |

**Geometry - AutoAlign**

|                     |                 |
|---------------------|-----------------|
| AutoAlign           | Head > Brain    |
| Initial Position    | L1.2 P49.6 H8.9 |
| L                   | 1.2 mm          |
| P                   | 49.6 mm         |
| H                   | 8.9 mm          |
| Initial Rotation    | 0.00 deg        |
| Initial Orientation | Transversal     |

**System - Miscellaneous**

|                  |     |
|------------------|-----|
| Positioning mode | FIX |
|------------------|-----|

**System - Miscellaneous**

|                  |                      |
|------------------|----------------------|
| Table position   | H                    |
| Table position   | 0 mm                 |
| MSMA             | S - C - T            |
| Sagittal         | R >> L               |
| Coronal          | A >> P               |
| Transversal      | F >> H               |
| Save uncombined  | Off                  |
| AutoAlign        | Head > Brain         |
| Coil Select Mode | Off - AutoCoilSelect |

**System - Adjustments**

|                          |          |
|--------------------------|----------|
| B0 Shim mode             | Brain    |
| B1 Shim mode             | TrueForm |
| Adj. water suppr.        | Off      |
| Confirm freq. adjustment | Off      |
| Assume Dominant Fat      | Off      |
| Assume Silicone          | Off      |
| Adjustment Tolerance     | Auto     |

**System - Adjust Volume**

|             |                    |
|-------------|--------------------|
| Position    | L1.2 P49.6 H8.9 mm |
| Orientation | Transversal        |
| Rotation    | 0.00 deg           |
| A >> P      | 18 mm              |
| R >> L      | 30 mm              |
| F >> H      | 18 mm              |
| Reset       | Off                |

**System - Tx/Rx**

|                     |                |
|---------------------|----------------|
| Frequency 1H        | 297.207726 MHz |
| Correction factor   | 1              |
| Gain                | High           |
| Img. Scale Cor.     | 1.000          |
| Reset               | Off            |
| ? Ref. amplitude 1H | 0.000 V        |

**Physio - Signal1**

|                 |         |
|-----------------|---------|
| 1st Signal/Mode | None    |
| TR              | 5000 ms |

**Sequence - Common**

|                      |         |
|----------------------|---------|
| Introduction         | On      |
| Preparation scans    | 2       |
| Delta frequency      | 0.0 ppm |
| Phase cycling        | Auto    |
| Bandwidth            | 6000 Hz |
| Acquisition duration | 341 ms  |
| Remove oversampling  | On      |

**Sequence - Nuclei**

|                       |      |
|-----------------------|------|
| TX/RX Nucleus         | 1H   |
| TX/RX delta frequency | 0 Hz |
| TX Nucleus            | None |
| TX delta frequency    | 0 Hz |
| Coil elements         | OCC  |

**Sequence - Special**

|                        |           |
|------------------------|-----------|
| RF pulse duration      | 1520 us   |
| Spoiler max. amplitude | 30.0 mT/m |
| Refocus grad. factor   | 1.00      |

**Sequence - Special**

|                      |            |
|----------------------|------------|
| OVS slab thickness   | 100.0 mm   |
| OVS slab pos. offset | 5.0 mm     |
| Spoiler duration     | 1500 us    |
| Acq. window shift    | 200 us     |
| Min. settling delay  | 100 us     |
| Gradient ramp time   | 200 us     |
| VAPOR flip angle     | 60 deg     |
| VAPOR delay 8        | 16 ms      |
| VAPOR delay 7        | 66 ms      |
| OVS pulse duration   | 2560 us    |
| OVS flip angle RO    | 90 deg     |
| OVS flip angle PH    | 90 deg     |
| OVS flip angle SL    | 90 deg     |
| VAPOR delay 6        | 71 ms      |
| VAPOR delay 5        | 112 ms     |
| VAPOR delay 4        | 115 ms     |
| VAPOR delay 3        | 132 ms     |
| VAPOR delay 2        | 110 ms     |
| VAPOR delay 1        | 160 ms     |
| Enable OVS           | On         |
| Weighted averages    | Off        |
| Send ref. scans      | Off        |
| Inversion pulse      | Off        |
| Symmetric RF pulses  | On         |
| Invert SS grad. pol. | Off        |
| Shift RO frequency   | Off        |
| Debug loop type      | Flip angle |
| Flip angle inc.      | 3 deg      |
| Measurements         | 10         |

\\USER\PHCP\MRS\final\OCC steam eja ws check

TA: 0:38 PM: FIX Vol: 18 ×30 ×18 mmRel. SNR: 1.00 : steam

**Properties**

|                                               |                    |
|-----------------------------------------------|--------------------|
| Prio recon                                    | Off                |
| Load images to viewer                         | On                 |
| Inline movie                                  | Off                |
| Auto store images                             | On                 |
| Load images to stamp segments                 | Off                |
| Load images to graphic segments               | Off                |
| Auto open inline display                      | Off                |
| Auto close inline display                     | Off                |
| Start measurement without further preparation | Off                |
| Wait for user to start                        | Off                |
| Start measurements                            | Single measurement |

**Routine**

|               |                    |
|---------------|--------------------|
| Position      | L1.2 P49.6 H8.9 mm |
| Orientation   | Transversal        |
| Rotation      | 0 deg              |
| Vol R >> L    | 30 mm              |
| Vol R >> L    | 30 mm              |
| Vol F >> H    | 18 mm              |
| TR            | 5000 ms            |
| TE            | 8.00 ms            |
| Averages      | 4                  |
| Filter        | None               |
| Coil elements | OCC                |

**Contrast**

|                     |              |
|---------------------|--------------|
| TR                  | 5000 ms      |
| TE                  | 8.00 ms      |
| TM                  | 32.00 ms     |
| Averages            | 4            |
| Flip angle          | 90 deg       |
| VAPOR               | Enabled      |
| VAPOR suppr.        | Water suppr. |
| Water s. BW         | 135 Hz       |
| Water s. delta pos. | 0.00 ppm     |
| Measurements        | 1            |

**Resolution - Common**

|             |      |
|-------------|------|
| Vector size | 2048 |
|-------------|------|

**Geometry - Common**

|             |                    |
|-------------|--------------------|
| Position    | L1.2 P49.6 H8.9 mm |
| Orientation | Transversal        |
| Rotation    | 0 deg              |
| Vol R >> L  | 30 mm              |
| Vol A >> P  | 18 mm              |
| Vol F >> H  | 18 mm              |

**Geometry - AutoAlign**

|                     |                 |
|---------------------|-----------------|
| AutoAlign           | Head > Brain    |
| Initial Position    | L1.2 P49.6 H8.9 |
| L                   | 1.2 mm          |
| P                   | 49.6 mm         |
| H                   | 8.9 mm          |
| Initial Rotation    | 0.00 deg        |
| Initial Orientation | Transversal     |

**System - Miscellaneous**

|                  |     |
|------------------|-----|
| Positioning mode | FIX |
|------------------|-----|

**System - Miscellaneous**

|                  |                      |
|------------------|----------------------|
| Table position   | H                    |
| Table position   | 0 mm                 |
| MSMA             | S - C - T            |
| Sagittal         | R >> L               |
| Coronal          | A >> P               |
| Transversal      | F >> H               |
| Save uncombined  | Off                  |
| AutoAlign        | Head > Brain         |
| Coil Select Mode | Off - AutoCoilSelect |

**System - Adjustments**

|                          |          |
|--------------------------|----------|
| B0 Shim mode             | Brain    |
| B1 Shim mode             | TrueForm |
| Adj. water suppr.        | Off      |
| Confirm freq. adjustment | Off      |
| Assume Dominant Fat      | Off      |
| Assume Silicone          | Off      |
| Adjustment Tolerance     | Auto     |

**System - Adjust Volume**

|             |                    |
|-------------|--------------------|
| Position    | L1.2 P49.6 H8.9 mm |
| Orientation | Transversal        |
| Rotation    | 0.00 deg           |
| A >> P      | 18 mm              |
| R >> L      | 30 mm              |
| F >> H      | 18 mm              |
| Reset       | Off                |

**System - Tx/Rx**

|                     |                |
|---------------------|----------------|
| Frequency 1H        | 297.207726 MHz |
| Correction factor   | 1              |
| Gain                | High           |
| Img. Scale Cor.     | 1.000          |
| Reset               | Off            |
| ? Ref. amplitude 1H | 0.000 V        |

**Physio - Signal1**

|                 |         |
|-----------------|---------|
| 1st Signal/Mode | None    |
| TR              | 5000 ms |

**Sequence - Common**

|                      |          |
|----------------------|----------|
| Introduction         | On       |
| Preparation scans    | 2        |
| Delta frequency      | -1.7 ppm |
| Phase cycling        | Auto     |
| Bandwidth            | 6000 Hz  |
| Acquisition duration | 341 ms   |
| Remove oversampling  | On       |

**Sequence - Nuclei**

|                       |      |
|-----------------------|------|
| TX/RX Nucleus         | 1H   |
| TX/RX delta frequency | 0 Hz |
| TX Nucleus            | None |
| TX delta frequency    | 0 Hz |
| Coil elements         | OCC  |

**Sequence - Special**

|                        |           |
|------------------------|-----------|
| RF pulse duration      | 1280 us   |
| Spoiler max. amplitude | 30.0 mT/m |
| Refocus grad. factor   | 1.00      |

**Sequence - Special**

|                      |          |
|----------------------|----------|
| OVS slab thickness   | 100.0 mm |
| OVS slab pos. offset | 5.0 mm   |
| Spoiler duration     | 1500 us  |
| Acq. window shift    | 200 us   |
| Min. settling delay  | 100 us   |
| Gradient ramp time   | 200 us   |
| VAPOR flip angle     | 72 deg   |
| VAPOR delay 8        | 16 ms    |
| VAPOR delay 7        | 66 ms    |
| OVS pulse duration   | 2560 us  |
| OVS flip angle RO    | 90 deg   |
| OVS flip angle PH    | 90 deg   |
| OVS flip angle SL    | 90 deg   |
| VAPOR delay 6        | 71 ms    |
| VAPOR delay 5        | 112 ms   |
| VAPOR delay 4        | 115 ms   |
| VAPOR delay 3        | 132 ms   |
| VAPOR delay 2        | 110 ms   |
| VAPOR delay 1        | 160 ms   |
| Enable OVS           | On       |
| Resolve averages     | On       |
| Send ref. scans      | Off      |
| Inversion pulse      | Off      |
| Symmetric RF pulses  | On       |
| Invert SS grad. pol. | Off      |
| Shift RO frequency   | Off      |
| Debug loop type      | None     |



\\USER\PHCP\MRS\final\OCC steam eja metab

TA: 8:33 PM: FIX Vol: 18 ×30 ×18 mmRel. SNR: 1.00 : steam

**Properties**

|                                               |                    |
|-----------------------------------------------|--------------------|
| Prio recon                                    | Off                |
| Load images to viewer                         | On                 |
| Inline movie                                  | Off                |
| Auto store images                             | On                 |
| Load images to stamp segments                 | Off                |
| Load images to graphic segments               | Off                |
| Auto open inline display                      | Off                |
| Auto close inline display                     | Off                |
| Start measurement without further preparation | Off                |
| Wait for user to start                        | Off                |
| Start measurements                            | Single measurement |

**Routine**

|               |                    |
|---------------|--------------------|
| Position      | L1.2 P49.6 H8.9 mm |
| Orientation   | Transversal        |
| Rotation      | 0 deg              |
| Vol R >> L    | 30 mm              |
| Vol R >> L    | 30 mm              |
| Vol F >> H    | 18 mm              |
| TR            | 5000 ms            |
| TE            | 8.00 ms            |
| Averages      | 96                 |
| Filter        | None               |
| Coil elements | OCC                |

**Contrast**

|                     |              |
|---------------------|--------------|
| TR                  | 5000 ms      |
| TE                  | 8.00 ms      |
| TM                  | 32.00 ms     |
| Averages            | 96           |
| Flip angle          | 90 deg       |
| VAPOR               | Enabled      |
| VAPOR suppr.        | Water suppr. |
| Water s. BW         | 135 Hz       |
| Water s. delta pos. | 0.00 ppm     |
| Measurements        | 1            |

**Resolution - Common**

|             |      |
|-------------|------|
| Vector size | 2048 |
|-------------|------|

**Geometry - Common**

|             |                    |
|-------------|--------------------|
| Position    | L1.2 P49.6 H8.9 mm |
| Orientation | Transversal        |
| Rotation    | 0 deg              |
| Vol R >> L  | 30 mm              |
| Vol A >> P  | 18 mm              |
| Vol F >> H  | 18 mm              |

**Geometry - AutoAlign**

|                     |                 |
|---------------------|-----------------|
| AutoAlign           | Head > Brain    |
| Initial Position    | L1.2 P49.6 H8.9 |
| L                   | 1.2 mm          |
| P                   | 49.6 mm         |
| H                   | 8.9 mm          |
| Initial Rotation    | 0.00 deg        |
| Initial Orientation | Transversal     |

**System - Miscellaneous**

|                  |     |
|------------------|-----|
| Positioning mode | FIX |
|------------------|-----|

**System - Miscellaneous**

|                  |                      |
|------------------|----------------------|
| Table position   | H                    |
| Table position   | 0 mm                 |
| MSMA             | S - C - T            |
| Sagittal         | R >> L               |
| Coronal          | A >> P               |
| Transversal      | F >> H               |
| Save uncombined  | Off                  |
| AutoAlign        | Head > Brain         |
| Coil Select Mode | Off - AutoCoilSelect |

**System - Adjustments**

|                          |          |
|--------------------------|----------|
| B0 Shim mode             | Brain    |
| B1 Shim mode             | TrueForm |
| Adj. water suppr.        | Off      |
| Confirm freq. adjustment | Off      |
| Assume Dominant Fat      | Off      |
| Assume Silicone          | Off      |
| Adjustment Tolerance     | Auto     |

**System - Adjust Volume**

|             |                    |
|-------------|--------------------|
| Position    | L1.2 P49.6 H8.9 mm |
| Orientation | Transversal        |
| Rotation    | 0.00 deg           |
| A >> P      | 18 mm              |
| R >> L      | 30 mm              |
| F >> H      | 18 mm              |
| Reset       | Off                |

**System - Tx/Rx**

|                     |                |
|---------------------|----------------|
| Frequency 1H        | 297.207726 MHz |
| Correction factor   | 1              |
| Gain                | High           |
| Img. Scale Cor.     | 1.000          |
| Reset               | Off            |
| ? Ref. amplitude 1H | 0.000 V        |

**Physio - Signal1**

|                 |         |
|-----------------|---------|
| 1st Signal/Mode | None    |
| TR              | 5000 ms |

**Sequence - Common**

|                      |          |
|----------------------|----------|
| Introduction         | On       |
| Preparation scans    | 2        |
| Delta frequency      | -1.7 ppm |
| Phase cycling        | Auto     |
| Bandwidth            | 6000 Hz  |
| Acquisition duration | 341 ms   |
| Remove oversampling  | On       |

**Sequence - Nuclei**

|                       |      |
|-----------------------|------|
| TX/RX Nucleus         | 1H   |
| TX/RX delta frequency | 0 Hz |
| TX Nucleus            | None |
| TX delta frequency    | 0 Hz |
| Coil elements         | OCC  |

**Sequence - Special**

|                        |           |
|------------------------|-----------|
| RF pulse duration      | 1280 us   |
| Spoiler max. amplitude | 30.0 mT/m |
| Refocus grad. factor   | 1.00      |

**Sequence - Special**

|                      |          |
|----------------------|----------|
| OVS slab thickness   | 100.0 mm |
| OVS slab pos. offset | 5.0 mm   |
| Spoiler duration     | 1500 us  |
| Acq. window shift    | 200 us   |
| Min. settling delay  | 100 us   |
| Gradient ramp time   | 200 us   |
| VAPOR flip angle     | 72 deg   |
| VAPOR delay 8        | 16 ms    |
| VAPOR delay 7        | 66 ms    |
| OVS pulse duration   | 2560 us  |
| OVS flip angle RO    | 90 deg   |
| OVS flip angle PH    | 90 deg   |
| OVS flip angle SL    | 90 deg   |
| VAPOR delay 6        | 71 ms    |
| VAPOR delay 5        | 112 ms   |
| VAPOR delay 4        | 115 ms   |
| VAPOR delay 3        | 132 ms   |
| VAPOR delay 2        | 110 ms   |
| VAPOR delay 1        | 160 ms   |
| Enable OVS           | On       |
| Resolve averages     | On       |
| Send ref. scans      | Off      |
| Inversion pulse      | Off      |
| Symmetric RF pulses  | On       |
| Invert SS grad. pol. | Off      |
| Shift RO frequency   | Off      |
| Debug loop type      | None     |

\\USER\PHCP\MRS\final\OCC steam eja w1

TA: 0:23 PM: FIX Vol: 18 ×30 ×18 mmRel. SNR: 1.00 : steam

**Properties**

|                                               |                    |
|-----------------------------------------------|--------------------|
| Prio recon                                    | Off                |
| Load images to viewer                         | On                 |
| Inline movie                                  | Off                |
| Auto store images                             | On                 |
| Load images to stamp segments                 | Off                |
| Load images to graphic segments               | Off                |
| Auto open inline display                      | Off                |
| Auto close inline display                     | Off                |
| Start measurement without further preparation | Off                |
| Wait for user to start                        | Off                |
| Start measurements                            | Single measurement |

**Routine**

|               |                    |
|---------------|--------------------|
| Position      | L1.2 P49.6 H8.9 mm |
| Orientation   | Transversal        |
| Rotation      | 0 deg              |
| Vol R >> L    | 30 mm              |
| Vol R >> L    | 30 mm              |
| Vol F >> H    | 18 mm              |
| TR            | 5000 ms            |
| TE            | 8.00 ms            |
| Averages      | 1                  |
| Filter        | None               |
| Coil elements | OCC                |

**Contrast**

|                     |              |
|---------------------|--------------|
| TR                  | 5000 ms      |
| TE                  | 8.00 ms      |
| TM                  | 32.00 ms     |
| Averages            | 1            |
| Flip angle          | 90 deg       |
| VAPOR               | Only RF off  |
| VAPOR suppr.        | Water suppr. |
| Water s. BW         | 135 Hz       |
| Water s. delta pos. | 0.00 ppm     |
| Measurements        | 1            |

**Resolution - Common**

|             |      |
|-------------|------|
| Vector size | 2048 |
|-------------|------|

**Geometry - Common**

|             |                    |
|-------------|--------------------|
| Position    | L1.2 P49.6 H8.9 mm |
| Orientation | Transversal        |
| Rotation    | 0 deg              |
| Vol R >> L  | 30 mm              |
| Vol A >> P  | 18 mm              |
| Vol F >> H  | 18 mm              |

**Geometry - AutoAlign**

|                     |                 |
|---------------------|-----------------|
| AutoAlign           | Head > Brain    |
| Initial Position    | L1.2 P49.6 H8.9 |
| L                   | 1.2 mm          |
| P                   | 49.6 mm         |
| H                   | 8.9 mm          |
| Initial Rotation    | 0.00 deg        |
| Initial Orientation | Transversal     |

**System - Miscellaneous**

|                  |     |
|------------------|-----|
| Positioning mode | FIX |
|------------------|-----|

**System - Miscellaneous**

|                  |                      |
|------------------|----------------------|
| Table position   | H                    |
| Table position   | 0 mm                 |
| MSMA             | S - C - T            |
| Sagittal         | R >> L               |
| Coronal          | A >> P               |
| Transversal      | F >> H               |
| Save uncombined  | Off                  |
| AutoAlign        | Head > Brain         |
| Coil Select Mode | Off - AutoCoilSelect |

**System - Adjustments**

|                          |          |
|--------------------------|----------|
| B0 Shim mode             | Brain    |
| B1 Shim mode             | TrueForm |
| Adj. water suppr.        | Off      |
| Confirm freq. adjustment | Off      |
| Assume Dominant Fat      | Off      |
| Assume Silicone          | Off      |
| Adjustment Tolerance     | Auto     |

**System - Adjust Volume**

|             |                    |
|-------------|--------------------|
| Position    | L1.2 P49.6 H8.9 mm |
| Orientation | Transversal        |
| Rotation    | 0.00 deg           |
| A >> P      | 18 mm              |
| R >> L      | 30 mm              |
| F >> H      | 18 mm              |
| Reset       | Off                |

**System - Tx/Rx**

|                     |                |
|---------------------|----------------|
| Frequency 1H        | 297.207726 MHz |
| Correction factor   | 1              |
| Gain                | High           |
| Img. Scale Cor.     | 1.000          |
| Reset               | Off            |
| ? Ref. amplitude 1H | 0.000 V        |

**Physio - Signal1**

|                 |         |
|-----------------|---------|
| 1st Signal/Mode | None    |
| TR              | 5000 ms |

**Sequence - Common**

|                      |         |
|----------------------|---------|
| Introduction         | On      |
| Preparation scans    | 2       |
| Delta frequency      | 0.0 ppm |
| Phase cycling        | Auto    |
| Bandwidth            | 6000 Hz |
| Acquisition duration | 341 ms  |
| Remove oversampling  | On      |

**Sequence - Nuclei**

|                       |      |
|-----------------------|------|
| TX/RX Nucleus         | 1H   |
| TX/RX delta frequency | 0 Hz |
| TX Nucleus            | None |
| TX delta frequency    | 0 Hz |
| Coil elements         | OCC  |

**Sequence - Special**

|                        |           |
|------------------------|-----------|
| RF pulse duration      | 1280 us   |
| Spoiler max. amplitude | 30.0 mT/m |
| Refocus grad. factor   | 1.00      |

**Sequence - Special**

|                      |          |
|----------------------|----------|
| OVS slab thickness   | 100.0 mm |
| OVS slab pos. offset | 5.0 mm   |
| Spoiler duration     | 1500 us  |
| Acq. window shift    | 200 us   |
| Min. settling delay  | 100 us   |
| Gradient ramp time   | 200 us   |
| VAPOR flip angle     | 60 deg   |
| VAPOR delay 8        | 16 ms    |
| VAPOR delay 7        | 66 ms    |
| OVS pulse duration   | 2560 us  |
| OVS flip angle RO    | 90 deg   |
| OVS flip angle PH    | 90 deg   |
| OVS flip angle SL    | 90 deg   |
| VAPOR delay 6        | 71 ms    |
| VAPOR delay 5        | 112 ms   |
| VAPOR delay 4        | 115 ms   |
| VAPOR delay 3        | 132 ms   |
| VAPOR delay 2        | 110 ms   |
| VAPOR delay 1        | 160 ms   |
| Enable OVS           | On       |
| Send ref. scans      | Off      |
| Inversion pulse      | Off      |
| Symmetric RF pulses  | On       |
| Invert SS grad. pol. | Off      |
| Shift RO frequency   | Off      |
| Debug loop type      | None     |

\\USER\PHCP\MRS\final\OCC steam eja w4

TA: 0:38 PM: FIX Vol: 18 ×30 ×18 mmRel. SNR: 1.00 : steam

**Properties**

|                                               |                    |
|-----------------------------------------------|--------------------|
| Prio recon                                    | Off                |
| Load images to viewer                         | On                 |
| Inline movie                                  | Off                |
| Auto store images                             | On                 |
| Load images to stamp segments                 | Off                |
| Load images to graphic segments               | Off                |
| Auto open inline display                      | Off                |
| Auto close inline display                     | Off                |
| Start measurement without further preparation | Off                |
| Wait for user to start                        | Off                |
| Start measurements                            | Single measurement |

**Routine**

|               |                    |
|---------------|--------------------|
| Position      | L1.2 P49.6 H8.9 mm |
| Orientation   | Transversal        |
| Rotation      | 0 deg              |
| Vol R >> L    | 30 mm              |
| Vol R >> L    | 30 mm              |
| Vol F >> H    | 18 mm              |
| TR            | 5000 ms            |
| TE            | 8.00 ms            |
| Averages      | 4                  |
| Filter        | None               |
| Coil elements | OCC                |

**Contrast**

|                     |              |
|---------------------|--------------|
| TR                  | 5000 ms      |
| TE                  | 8.00 ms      |
| TM                  | 32.00 ms     |
| Averages            | 4            |
| Flip angle          | 90 deg       |
| VAPOR               | Only RF off  |
| VAPOR suppr.        | Water suppr. |
| Water s. BW         | 135 Hz       |
| Water s. delta pos. | 0.00 ppm     |
| Measurements        | 1            |

**Resolution - Common**

|             |      |
|-------------|------|
| Vector size | 2048 |
|-------------|------|

**Geometry - Common**

|             |                    |
|-------------|--------------------|
| Position    | L1.2 P49.6 H8.9 mm |
| Orientation | Transversal        |
| Rotation    | 0 deg              |
| Vol R >> L  | 30 mm              |
| Vol A >> P  | 18 mm              |
| Vol F >> H  | 18 mm              |

**Geometry - AutoAlign**

|                     |                 |
|---------------------|-----------------|
| AutoAlign           | Head > Brain    |
| Initial Position    | L1.2 P49.6 H8.9 |
| L                   | 1.2 mm          |
| P                   | 49.6 mm         |
| H                   | 8.9 mm          |
| Initial Rotation    | 0.00 deg        |
| Initial Orientation | Transversal     |

**System - Miscellaneous**

|                  |     |
|------------------|-----|
| Positioning mode | FIX |
|------------------|-----|

**System - Miscellaneous**

|                  |                      |
|------------------|----------------------|
| Table position   | H                    |
| Table position   | 0 mm                 |
| MSMA             | S - C - T            |
| Sagittal         | R >> L               |
| Coronal          | A >> P               |
| Transversal      | F >> H               |
| Save uncombined  | Off                  |
| AutoAlign        | Head > Brain         |
| Coil Select Mode | Off - AutoCoilSelect |

**System - Adjustments**

|                          |          |
|--------------------------|----------|
| B0 Shim mode             | Brain    |
| B1 Shim mode             | TrueForm |
| Adj. water suppr.        | Off      |
| Confirm freq. adjustment | Off      |
| Assume Dominant Fat      | Off      |
| Assume Silicone          | Off      |
| Adjustment Tolerance     | Auto     |

**System - Adjust Volume**

|             |                    |
|-------------|--------------------|
| Position    | L1.2 P49.6 H8.9 mm |
| Orientation | Transversal        |
| Rotation    | 0.00 deg           |
| A >> P      | 18 mm              |
| R >> L      | 30 mm              |
| F >> H      | 18 mm              |
| Reset       | Off                |

**System - Tx/Rx**

|                     |                |
|---------------------|----------------|
| Frequency 1H        | 297.207726 MHz |
| Correction factor   | 1              |
| Gain                | High           |
| Img. Scale Cor.     | 1.000          |
| Reset               | Off            |
| ? Ref. amplitude 1H | 0.000 V        |

**Physio - Signal1**

|                 |         |
|-----------------|---------|
| 1st Signal/Mode | None    |
| TR              | 5000 ms |

**Sequence - Common**

|                      |         |
|----------------------|---------|
| Introduction         | On      |
| Preparation scans    | 2       |
| Delta frequency      | 0.0 ppm |
| Phase cycling        | Auto    |
| Bandwidth            | 6000 Hz |
| Acquisition duration | 341 ms  |
| Remove oversampling  | On      |

**Sequence - Nuclei**

|                       |      |
|-----------------------|------|
| TX/RX Nucleus         | 1H   |
| TX/RX delta frequency | 0 Hz |
| TX Nucleus            | None |
| TX delta frequency    | 0 Hz |
| Coil elements         | OCC  |

**Sequence - Special**

|                        |           |
|------------------------|-----------|
| RF pulse duration      | 1280 us   |
| Spoiler max. amplitude | 30.0 mT/m |
| Refocus grad. factor   | 1.00      |

**Sequence - Special**

|                      |          |
|----------------------|----------|
| OVS slab thickness   | 100.0 mm |
| OVS slab pos. offset | 5.0 mm   |
| Spoiler duration     | 1500 us  |
| Acq. window shift    | 200 us   |
| Min. settling delay  | 100 us   |
| Gradient ramp time   | 200 us   |
| VAPOR flip angle     | 60 deg   |
| VAPOR delay 8        | 16 ms    |
| VAPOR delay 7        | 66 ms    |
| OVS pulse duration   | 2560 us  |
| OVS flip angle RO    | 90 deg   |
| OVS flip angle PH    | 90 deg   |
| OVS flip angle SL    | 90 deg   |
| VAPOR delay 6        | 71 ms    |
| VAPOR delay 5        | 112 ms   |
| VAPOR delay 4        | 115 ms   |
| VAPOR delay 3        | 132 ms   |
| VAPOR delay 2        | 110 ms   |
| VAPOR delay 1        | 160 ms   |
| Enable OVS           | On       |
| Resolve averages     | On       |
| Send ref. scans      | Off      |
| Inversion pulse      | Off      |
| Symmetric RF pulses  | On       |
| Invert SS grad. pol. | Off      |
| Shift RO frequency   | Off      |
| Debug loop type      | None     |

\\USER\PHCP\MRS\final\OCC steam eja w1 noOVS

TA: 0:23 PM: FIX Vol: 18 ×30 ×18 mmRel. SNR: 1.00 : steam

**Properties**

|                                               |                    |
|-----------------------------------------------|--------------------|
| Prio recon                                    | Off                |
| Load images to viewer                         | On                 |
| Inline movie                                  | Off                |
| Auto store images                             | On                 |
| Load images to stamp segments                 | Off                |
| Load images to graphic segments               | Off                |
| Auto open inline display                      | Off                |
| Auto close inline display                     | Off                |
| Start measurement without further preparation | Off                |
| Wait for user to start                        | Off                |
| Start measurements                            | Single measurement |

**Routine**

|               |                    |
|---------------|--------------------|
| Position      | L1.2 P49.6 H8.9 mm |
| Orientation   | Transversal        |
| Rotation      | 0 deg              |
| Vol R >> L    | 30 mm              |
| Vol R >> L    | 30 mm              |
| Vol F >> H    | 18 mm              |
| TR            | 5000 ms            |
| TE            | 8.00 ms            |
| Averages      | 1                  |
| Filter        | None               |
| Coil elements | OCC                |

**Contrast**

|                     |              |
|---------------------|--------------|
| TR                  | 5000 ms      |
| TE                  | 8.00 ms      |
| TM                  | 32.00 ms     |
| Averages            | 1            |
| Flip angle          | 90 deg       |
| VAPOR               | Only RF off  |
| VAPOR suppr.        | Water suppr. |
| Water s. BW         | 135 Hz       |
| Water s. delta pos. | 0.00 ppm     |
| Measurements        | 1            |

**Resolution - Common**

|             |      |
|-------------|------|
| Vector size | 2048 |
|-------------|------|

**Geometry - Common**

|             |                    |
|-------------|--------------------|
| Position    | L1.2 P49.6 H8.9 mm |
| Orientation | Transversal        |
| Rotation    | 0 deg              |
| Vol R >> L  | 30 mm              |
| Vol A >> P  | 18 mm              |
| Vol F >> H  | 18 mm              |

**Geometry - AutoAlign**

|                     |                 |
|---------------------|-----------------|
| AutoAlign           | Head > Brain    |
| Initial Position    | L1.2 P49.6 H8.9 |
| L                   | 1.2 mm          |
| P                   | 49.6 mm         |
| H                   | 8.9 mm          |
| Initial Rotation    | 0.00 deg        |
| Initial Orientation | Transversal     |

**System - Miscellaneous**

|                  |     |
|------------------|-----|
| Positioning mode | FIX |
|------------------|-----|

**System - Miscellaneous**

|                  |                      |
|------------------|----------------------|
| Table position   | H                    |
| Table position   | 0 mm                 |
| MSMA             | S - C - T            |
| Sagittal         | R >> L               |
| Coronal          | A >> P               |
| Transversal      | F >> H               |
| Save uncombined  | Off                  |
| AutoAlign        | Head > Brain         |
| Coil Select Mode | Off - AutoCoilSelect |

**System - Adjustments**

|                          |          |
|--------------------------|----------|
| B0 Shim mode             | Brain    |
| B1 Shim mode             | TrueForm |
| Adj. water suppr.        | Off      |
| Confirm freq. adjustment | Off      |
| Assume Dominant Fat      | Off      |
| Assume Silicone          | Off      |
| Adjustment Tolerance     | Auto     |

**System - Adjust Volume**

|             |                    |
|-------------|--------------------|
| Position    | L1.2 P49.6 H8.9 mm |
| Orientation | Transversal        |
| Rotation    | 0.00 deg           |
| A >> P      | 18 mm              |
| R >> L      | 30 mm              |
| F >> H      | 18 mm              |
| Reset       | Off                |

**System - Tx/Rx**

|                     |                |
|---------------------|----------------|
| Frequency 1H        | 297.207726 MHz |
| Correction factor   | 1              |
| Gain                | High           |
| Img. Scale Cor.     | 1.000          |
| Reset               | Off            |
| ? Ref. amplitude 1H | 0.000 V        |

**Physio - Signal1**

|                 |         |
|-----------------|---------|
| 1st Signal/Mode | None    |
| TR              | 5000 ms |

**Sequence - Common**

|                      |         |
|----------------------|---------|
| Introduction         | On      |
| Preparation scans    | 2       |
| Delta frequency      | 0.0 ppm |
| Phase cycling        | Auto    |
| Bandwidth            | 6000 Hz |
| Acquisition duration | 341 ms  |
| Remove oversampling  | On      |

**Sequence - Nuclei**

|                       |      |
|-----------------------|------|
| TX/RX Nucleus         | 1H   |
| TX/RX delta frequency | 0 Hz |
| TX Nucleus            | None |
| TX delta frequency    | 0 Hz |
| Coil elements         | OCC  |

**Sequence - Special**

|                        |           |
|------------------------|-----------|
| RF pulse duration      | 1280 us   |
| Spoiler max. amplitude | 30.0 mT/m |
| Refocus grad. factor   | 1.00      |

**Sequence - Special**

|                      |         |
|----------------------|---------|
| Spoiler duration     | 1500 us |
| Acq. window shift    | 200 us  |
| Min. settling delay  | 100 us  |
| Gradient ramp time   | 200 us  |
| VAPOR flip angle     | 60 deg  |
| VAPOR delay 8        | 16 ms   |
| VAPOR delay 7        | 66 ms   |
| VAPOR delay 6        | 71 ms   |
| VAPOR delay 5        | 112 ms  |
| VAPOR delay 4        | 115 ms  |
| VAPOR delay 3        | 132 ms  |
| VAPOR delay 2        | 110 ms  |
| VAPOR delay 1        | 160 ms  |
| Enable OVS           | Off     |
| Send ref. scans      | Off     |
| Inversion pulse      | Off     |
| Symmetric RF pulses  | On      |
| Invert SS grad. pol. | Off     |
| Shift RO frequency   | Off     |
| Debug loop type      | None    |



\\USER\PHCP\MRS\final\OCC steam eja ws FA optimization

TA: 1:08 PM: FIX Vol: 18 ×30 ×18 mmRel. SNR: 1.00 : steam

**Properties**

|                                               |                    |
|-----------------------------------------------|--------------------|
| Prio recon                                    | Off                |
| Load images to viewer                         | On                 |
| Inline movie                                  | Off                |
| Auto store images                             | On                 |
| Load images to stamp segments                 | Off                |
| Load images to graphic segments               | Off                |
| Auto open inline display                      | Off                |
| Auto close inline display                     | Off                |
| Start measurement without further preparation | Off                |
| Wait for user to start                        | Off                |
| Start measurements                            | Single measurement |

**Routine**

|               |                    |
|---------------|--------------------|
| Position      | L1.2 P49.6 H8.9 mm |
| Orientation   | Transversal        |
| Rotation      | 0 deg              |
| Vol R >> L    | 30 mm              |
| Vol R >> L    | 30 mm              |
| Vol F >> H    | 18 mm              |
| TR            | 5000 ms            |
| TE            | 8.00 ms            |
| Averages      | 1                  |
| Filter        | None               |
| Coil elements | OCC                |

**Contrast**

|                     |              |
|---------------------|--------------|
| TR                  | 5000 ms      |
| TE                  | 8.00 ms      |
| TM                  | 32.00 ms     |
| Averages            | 1            |
| Flip angle          | 90 deg       |
| VAPOR               | Enabled      |
| VAPOR suppr.        | Water suppr. |
| Water s. BW         | 135 Hz       |
| Water s. delta pos. | 0.00 ppm     |
| Measurements        | 10           |

**Resolution - Common**

|             |      |
|-------------|------|
| Vector size | 2048 |
|-------------|------|

**Geometry - Common**

|             |                    |
|-------------|--------------------|
| Position    | L1.2 P49.6 H8.9 mm |
| Orientation | Transversal        |
| Rotation    | 0 deg              |
| Vol R >> L  | 30 mm              |
| Vol A >> P  | 18 mm              |
| Vol F >> H  | 18 mm              |

**Geometry - AutoAlign**

|                     |                 |
|---------------------|-----------------|
| AutoAlign           | Head > Brain    |
| Initial Position    | L1.2 P49.6 H8.9 |
| L                   | 1.2 mm          |
| P                   | 49.6 mm         |
| H                   | 8.9 mm          |
| Initial Rotation    | 0.00 deg        |
| Initial Orientation | Transversal     |

**System - Miscellaneous**

|                  |     |
|------------------|-----|
| Positioning mode | FIX |
|------------------|-----|

**System - Miscellaneous**

|                  |                      |
|------------------|----------------------|
| Table position   | H                    |
| Table position   | 0 mm                 |
| MSMA             | S - C - T            |
| Sagittal         | R >> L               |
| Coronal          | A >> P               |
| Transversal      | F >> H               |
| Save uncombined  | Off                  |
| AutoAlign        | Head > Brain         |
| Coil Select Mode | Off - AutoCoilSelect |

**System - Adjustments**

|                          |          |
|--------------------------|----------|
| B0 Shim mode             | Brain    |
| B1 Shim mode             | TrueForm |
| Adj. water suppr.        | Off      |
| Confirm freq. adjustment | Off      |
| Assume Dominant Fat      | Off      |
| Assume Silicone          | Off      |
| Adjustment Tolerance     | Auto     |

**System - Adjust Volume**

|             |                    |
|-------------|--------------------|
| Position    | L1.2 P49.6 H8.9 mm |
| Orientation | Transversal        |
| Rotation    | 0.00 deg           |
| A >> P      | 18 mm              |
| R >> L      | 30 mm              |
| F >> H      | 18 mm              |
| Reset       | Off                |

**System - Tx/Rx**

|                     |                |
|---------------------|----------------|
| Frequency 1H        | 297.207726 MHz |
| Correction factor   | 1              |
| Gain                | High           |
| Img. Scale Cor.     | 1.000          |
| Reset               | Off            |
| ? Ref. amplitude 1H | 0.000 V        |

**Physio - Signal1**

|                 |         |
|-----------------|---------|
| 1st Signal/Mode | None    |
| TR              | 5000 ms |

**Sequence - Common**

|                      |          |
|----------------------|----------|
| Introduction         | On       |
| Preparation scans    | 2        |
| Delta frequency      | -1.7 ppm |
| Phase cycling        | Auto     |
| Bandwidth            | 6000 Hz  |
| Acquisition duration | 341 ms   |
| Remove oversampling  | On       |

**Sequence - Nuclei**

|                       |      |
|-----------------------|------|
| TX/RX Nucleus         | 1H   |
| TX/RX delta frequency | 0 Hz |
| TX Nucleus            | None |
| TX delta frequency    | 0 Hz |
| Coil elements         | OCC  |

**Sequence - Special**

|                        |           |
|------------------------|-----------|
| RF pulse duration      | 1280 us   |
| Spoiler max. amplitude | 30.0 mT/m |
| Refocus grad. factor   | 1.00      |

**Sequence - Special**

|                      |          |
|----------------------|----------|
| OVS slab thickness   | 100.0 mm |
| OVS slab pos. offset | 5.0 mm   |
| Spoiler duration     | 1500 us  |
| Acq. window shift    | 200 us   |
| Min. settling delay  | 100 us   |
| Gradient ramp time   | 200 us   |
| VAPOR flip angle     | 60 deg   |
| VAPOR delay 8        | 16 ms    |
| VAPOR delay 7        | 66 ms    |
| OVS pulse duration   | 2560 us  |
| OVS flip angle RO    | 90 deg   |
| OVS flip angle PH    | 90 deg   |
| OVS flip angle SL    | 90 deg   |
| VAPOR delay 6        | 71 ms    |
| VAPOR delay 5        | 112 ms   |
| VAPOR delay 4        | 115 ms   |
| VAPOR delay 3        | 132 ms   |
| VAPOR delay 2        | 110 ms   |
| VAPOR delay 1        | 160 ms   |
| Enable OVS           | On       |
| Weighted averages    | Off      |
| Send ref. scans      | Off      |
| Inversion pulse      | Off      |
| Symmetric RF pulses  | On       |
| Invert SS grad. pol. | Off      |
| Shift RO frequency   | Off      |
| Debug loop type      | WS FA    |
| WS FA inc.           | 2 deg    |
| Measurements         | 10       |

\\USER\PHCP\MRS\final\OCC steam eja ws delay 7

TA: 1:08 PM: FIX Vol: 18 ×30 ×18 mmRel. SNR: 1.00 : steam

**Properties**

|                                               |                    |
|-----------------------------------------------|--------------------|
| Prio recon                                    | Off                |
| Load images to viewer                         | On                 |
| Inline movie                                  | Off                |
| Auto store images                             | On                 |
| Load images to stamp segments                 | Off                |
| Load images to graphic segments               | Off                |
| Auto open inline display                      | Off                |
| Auto close inline display                     | Off                |
| Start measurement without further preparation | Off                |
| Wait for user to start                        | Off                |
| Start measurements                            | Single measurement |

**Routine**

|               |                    |
|---------------|--------------------|
| Position      | L1.2 P49.6 H8.9 mm |
| Orientation   | Transversal        |
| Rotation      | 0 deg              |
| Vol R >> L    | 30 mm              |
| Vol R >> L    | 30 mm              |
| Vol F >> H    | 18 mm              |
| TR            | 5000 ms            |
| TE            | 8.00 ms            |
| Averages      | 1                  |
| Filter        | None               |
| Coil elements | OCC                |

**Contrast**

|                     |              |
|---------------------|--------------|
| TR                  | 5000 ms      |
| TE                  | 8.00 ms      |
| TM                  | 32.00 ms     |
| Averages            | 1            |
| Flip angle          | 90 deg       |
| VAPOR               | Enabled      |
| VAPOR suppr.        | Water suppr. |
| Water s. BW         | 135 Hz       |
| Water s. delta pos. | 0.00 ppm     |
| Measurements        | 10           |

**Resolution - Common**

|             |      |
|-------------|------|
| Vector size | 2048 |
|-------------|------|

**Geometry - Common**

|             |                    |
|-------------|--------------------|
| Position    | L1.2 P49.6 H8.9 mm |
| Orientation | Transversal        |
| Rotation    | 0 deg              |
| Vol R >> L  | 30 mm              |
| Vol A >> P  | 18 mm              |
| Vol F >> H  | 18 mm              |

**Geometry - AutoAlign**

|                     |                 |
|---------------------|-----------------|
| AutoAlign           | Head > Brain    |
| Initial Position    | L1.2 P49.6 H8.9 |
| L                   | 1.2 mm          |
| P                   | 49.6 mm         |
| H                   | 8.9 mm          |
| Initial Rotation    | 0.00 deg        |
| Initial Orientation | Transversal     |

**System - Miscellaneous**

|                  |     |
|------------------|-----|
| Positioning mode | FIX |
|------------------|-----|

**System - Miscellaneous**

|                  |                      |
|------------------|----------------------|
| Table position   | H                    |
| Table position   | 0 mm                 |
| MSMA             | S - C - T            |
| Sagittal         | R >> L               |
| Coronal          | A >> P               |
| Transversal      | F >> H               |
| Save uncombined  | Off                  |
| AutoAlign        | Head > Brain         |
| Coil Select Mode | Off - AutoCoilSelect |

**System - Adjustments**

|                          |          |
|--------------------------|----------|
| B0 Shim mode             | Brain    |
| B1 Shim mode             | TrueForm |
| Adj. water suppr.        | Off      |
| Confirm freq. adjustment | Off      |
| Assume Dominant Fat      | Off      |
| Assume Silicone          | Off      |
| Adjustment Tolerance     | Auto     |

**System - Adjust Volume**

|             |                    |
|-------------|--------------------|
| Position    | L1.2 P49.6 H8.9 mm |
| Orientation | Transversal        |
| Rotation    | 0.00 deg           |
| A >> P      | 18 mm              |
| R >> L      | 30 mm              |
| F >> H      | 18 mm              |
| Reset       | Off                |

**System - Tx/Rx**

|                     |                |
|---------------------|----------------|
| Frequency 1H        | 297.207726 MHz |
| Correction factor   | 1              |
| Gain                | High           |
| Img. Scale Cor.     | 1.000          |
| Reset               | Off            |
| ? Ref. amplitude 1H | 0.000 V        |

**Physio - Signal1**

|                 |         |
|-----------------|---------|
| 1st Signal/Mode | None    |
| TR              | 5000 ms |

**Sequence - Common**

|                      |          |
|----------------------|----------|
| Introduction         | On       |
| Preparation scans    | 2        |
| Delta frequency      | -1.7 ppm |
| Phase cycling        | Auto     |
| Bandwidth            | 6000 Hz  |
| Acquisition duration | 341 ms   |
| Remove oversampling  | On       |

**Sequence - Nuclei**

|                       |      |
|-----------------------|------|
| TX/RX Nucleus         | 1H   |
| TX/RX delta frequency | 0 Hz |
| TX Nucleus            | None |
| TX delta frequency    | 0 Hz |
| Coil elements         | OCC  |

**Sequence - Special**

|                        |           |
|------------------------|-----------|
| RF pulse duration      | 1280 us   |
| Spoiler max. amplitude | 30.0 mT/m |
| Refocus grad. factor   | 1.00      |

**Sequence - Special**

|                      |            |
|----------------------|------------|
| OVS slab thickness   | 100.0 mm   |
| OVS slab pos. offset | 5.0 mm     |
| Spoiler duration     | 1500 us    |
| Acq. window shift    | 200 us     |
| Min. settling delay  | 100 us     |
| Gradient ramp time   | 200 us     |
| VAPOR flip angle     | 60 deg     |
| VAPOR delay 8        | 16 ms      |
| VAPOR delay 7        | 66 ms      |
| OVS pulse duration   | 2560 us    |
| OVS flip angle RO    | 90 deg     |
| OVS flip angle PH    | 90 deg     |
| OVS flip angle SL    | 90 deg     |
| VAPOR delay 6        | 71 ms      |
| VAPOR delay 5        | 112 ms     |
| VAPOR delay 4        | 115 ms     |
| VAPOR delay 3        | 132 ms     |
| VAPOR delay 2        | 110 ms     |
| VAPOR delay 1        | 160 ms     |
| Enable OVS           | On         |
| Weighted averages    | Off        |
| Send ref. scans      | Off        |
| Inversion pulse      | Off        |
| Symmetric RF pulses  | On         |
| Invert SS grad. pol. | Off        |
| Shift RO frequency   | Off        |
| Debug loop type      | WS delay 7 |
| WS delay 7 inc.      | 3 ms       |
| Measurements         | 10         |

\\USER\PHCP\MRS\final\PFC localizer

TA: 0:13 PM: REF Voxel size: 0.5x0.5x7.0 mmPAT: Off Rel. SNR: 1.00 : qfl

**Properties**

|                                               |                    |
|-----------------------------------------------|--------------------|
| Prio recon                                    | Off                |
| Load images to viewer                         | On                 |
| Inline movie                                  | Off                |
| Auto store images                             | On                 |
| Load images to stamp segments                 | On                 |
| Load images to graphic segments               | On                 |
| Auto open inline display                      | On                 |
| Auto close inline display                     | Off                |
| Start measurement without further preparation | Off                |
| Wait for user to start                        | Off                |
| Start measurements                            | Single measurement |

**Routine**

|                    |                   |
|--------------------|-------------------|
| Slice group        | 1                 |
| Slices             | 1                 |
| Dist. factor       | 20 %              |
| Position           | Isocenter         |
| Orientation        | Sagittal          |
| Phase enc. dir.    | A >> P            |
| Slice group        | 2                 |
| Slices             | 1                 |
| Dist. factor       | 20 %              |
| Position           | Isocenter         |
| Orientation        | Transversal       |
| Phase enc. dir.    | A >> P            |
| Slice group        | 3                 |
| Slices             | 1                 |
| Dist. factor       | 20 %              |
| Position           | Isocenter         |
| Orientation        | Coronal           |
| Phase enc. dir.    | R >> L            |
| AutoAlign          | ---               |
| Phase oversampling | 0 %               |
| FoV read           | 250 mm            |
| FoV phase          | 100.0 %           |
| Slice thickness    | 7.0 mm            |
| TR                 | 8.6 ms            |
| TE                 | 4.00 ms           |
| Averages           | 2                 |
| Concatenations     | 3                 |
| Filter             | Elliptical filter |
| Coil elements      | OCC;PFC           |

**Contrast - Common**

|                   |         |
|-------------------|---------|
| TR                | 8.6 ms  |
| TE                | 4.00 ms |
| TD                | 0 ms    |
| MTC               | Off     |
| Magn. preparation | None    |
| Flip angle        | 20 deg  |
| Fat suppr.        | None    |
| Water suppr.      | None    |
| SWI               | Off     |

**Contrast - Dynamic**

|                |            |
|----------------|------------|
| Averages       | 2          |
| Averaging mode | Short term |
| Reconstruction | Magnitude  |
| Measurements   | 1          |

**Contrast - Dynamic**

|                 |                  |
|-----------------|------------------|
| Multiple series | Each measurement |
|-----------------|------------------|

**Resolution - Common**

|                       |         |
|-----------------------|---------|
| FoV read              | 250 mm  |
| FoV phase             | 100.0 % |
| Slice thickness       | 7.0 mm  |
| Base resolution       | 256     |
| Phase resolution      | 90 %    |
| Phase partial Fourier | Off     |
| Interpolation         | On      |

**Resolution - iPAT**

|          |      |
|----------|------|
| PAT mode | None |
|----------|------|

**Resolution - Filter Image**

|                   |     |
|-------------------|-----|
| Image Filter      | Off |
| Distortion Corr.  | Off |
| Prescan Normalize | Off |
| Normalize         | Off |
| B1 filter         | Off |

**Resolution - Filter Rawdata**

|                   |     |
|-------------------|-----|
| Raw filter        | Off |
| Elliptical filter | On  |

**Geometry - Common**

|                  |             |
|------------------|-------------|
| Slice group      | 1           |
| Slices           | 1           |
| Dist. factor     | 20 %        |
| Position         | Isocenter   |
| Orientation      | Sagittal    |
| Phase enc. dir.  | A >> P      |
| Slice group      | 2           |
| Slices           | 1           |
| Dist. factor     | 20 %        |
| Position         | Isocenter   |
| Orientation      | Transversal |
| Phase enc. dir.  | A >> P      |
| Slice group      | 3           |
| Slices           | 1           |
| Dist. factor     | 20 %        |
| Position         | Isocenter   |
| Orientation      | Coronal     |
| Phase enc. dir.  | R >> L      |
| FoV read         | 250 mm      |
| FoV phase        | 100.0 %     |
| Slice thickness  | 7.0 mm      |
| TR               | 8.6 ms      |
| Multi-slice mode | Sequential  |
| Series           | Interleaved |
| Concatenations   | 3           |

**Geometry - AutoAlign**

|                 |             |
|-----------------|-------------|
| Slice group     | 1           |
| Position        | Isocenter   |
| Orientation     | Sagittal    |
| Phase enc. dir. | A >> P      |
| Slice group     | 2           |
| Position        | Isocenter   |
| Orientation     | Transversal |

**Geometry - AutoAlign**

|                     |           |
|---------------------|-----------|
| Phase enc. dir.     | A >> P    |
| Slice group         | 3         |
| Position            | Isocenter |
| Orientation         | Coronal   |
| Phase enc. dir.     | R >> L    |
| AutoAlign           | ---       |
| Initial Position    | Isocenter |
| L                   | 0.0 mm    |
| P                   | 0.0 mm    |
| H                   | 0.0 mm    |
| Initial Rotation    | 0.00 deg  |
| Initial Orientation | Sagittal  |

**Geometry - Saturation**

|                 |          |
|-----------------|----------|
| Saturation mode | Standard |
| Fat suppr.      | None     |
| Water suppr.    | None     |
| Special sat.    | None     |

**Geometry - Tim Planning Suite**

|                   |      |
|-------------------|------|
| Set-n-Go Protocol | Off  |
| Table position    | H    |
| Table position    | 0 mm |
| Inline Composing  | Off  |

**Geometry - Tim CT**

|                 |         |
|-----------------|---------|
| Tim CT mode     | Off     |
| Slices          | 1       |
| Slice thickness | 7.0 mm  |
| Dist. factor    | 20 %    |
| FoV read        | 250 mm  |
| FoV phase       | 100.0 % |
| Segments        | 1       |

**System - Miscellaneous**

|                     |                      |
|---------------------|----------------------|
| Positioning mode    | REF                  |
| Table position      | F                    |
| Table position      | 0 mm                 |
| MSMA                | S - C - T            |
| Sagittal            | R >> L               |
| Coronal             | A >> P               |
| Transversal         | F >> H               |
| Coil Combine Mode   | Sum of Squares       |
| Save uncombined     | Off                  |
| Matrix Optimization | Off                  |
| AutoAlign           | ---                  |
| Coil Select Mode    | Off - AutoCoilSelect |

**System - Adjustments**

|                          |          |
|--------------------------|----------|
| B0 Shim mode             | Tune up  |
| B1 Shim mode             | TrueForm |
| Confirm freq. adjustment | Off      |
| Assume Dominant Fat      | Off      |
| Assume Silicone          | Off      |
| Adjustment Tolerance     | Auto     |

**System - Adjust Volume**

|             |             |
|-------------|-------------|
| Position    | Isocenter   |
| Orientation | Transversal |
| Rotation    | 0.00 deg    |
| A >> P      | 263 mm      |
| R >> L      | 350 mm      |
| F >> H      | 350 mm      |
| Reset       | Off         |

**System - Tx/Rx**

|                     |                |
|---------------------|----------------|
| Frequency 1H        | 297.207726 MHz |
| Correction factor   | 1              |
| Gain                | High           |
| Img. Scale Cor.     | 1.000          |
| Reset               | Off            |
| ? Ref. amplitude 1H | 0.000 V        |

**Physio - Signal1**

|                 |        |
|-----------------|--------|
| 1st Signal/Mode | None   |
| TR              | 8.6 ms |
| Concatenations  | 3      |
| Segments        | 1      |

**Physio - Cardiac**

|                   |         |
|-------------------|---------|
| Tagging           | None    |
| Magn. preparation | None    |
| Fat suppr.        | None    |
| Dark blood        | Off     |
| FoV read          | 250 mm  |
| FoV phase         | 100.0 % |
| Phase resolution  | 90 %    |

**Physio - PACE**

|                |     |
|----------------|-----|
| Resp. control  | Off |
| Concatenations | 3   |

**Inline - Common**

|                      |     |
|----------------------|-----|
| Subtract             | Off |
| Measurements         | 1   |
| StdDev               | Off |
| Liver registration   | Off |
| Save original images | On  |

**Inline - MIP**

|                      |     |
|----------------------|-----|
| MIP-Sag              | Off |
| MIP-Cor              | Off |
| MIP-Tra              | Off |
| MIP-Time             | Off |
| Save original images | On  |

**Inline - Soft Tissue**

|              |     |
|--------------|-----|
| Wash - In    | Off |
| Wash - Out   | Off |
| TTP          | Off |
| PEI          | Off |
| MIP - time   | Off |
| Measurements | 1   |

**Inline - Composing**

|                  |     |
|------------------|-----|
| Inline Composing | Off |
| Distortion Corr. | Off |

**Inline - MapIt**

|                      |         |
|----------------------|---------|
| Save original images | On      |
| MapIt                | None    |
| Flip angle           | 20 deg  |
| Measurements         | 1       |
| Contrasts            | 1       |
| TR                   | 8.6 ms  |
| TE                   | 4.00 ms |

**Sequence - Part 1**

|              |    |
|--------------|----|
| Introduction | On |
|--------------|----|

**Sequence - Part 1**

|                     |            |
|---------------------|------------|
| Dimension           | 2D         |
| Phase stabilisation | Off        |
| Asymmetric echo     | Allowed    |
| Contrasts           | 1          |
| Flow comp.          | No         |
| Multi-slice mode    | Sequential |
| Bandwidth           | 320 Hz/Px  |

**Sequence - Part 2**

|                          |            |
|--------------------------|------------|
| Segments                 | 1          |
| Acoustic noise reduction | Active     |
| RF pulse type            | Normal     |
| Gradient mode            | Normal     |
| Excitation               | Slice-sel. |
| RF spoiling              | On         |

**Sequence - Nuclei**

|                       |         |
|-----------------------|---------|
| TX/RX Nucleus         | 1H      |
| TX/RX delta frequency | 0 Hz    |
| TX Nucleus            | None    |
| TX delta frequency    | 0 Hz    |
| Coil elements         | OCC;PFC |

**Sequence - Assistant**

|      |     |
|------|-----|
| Mode | Off |
|------|-----|

\\USER\PHCP\MRS\final\PFC AAScout\_32ch

TA: 0:18 PM: REF Voxel size: 1.6×1.6×1.6 mmPAT: 2 Rel. SNR: 1.00 : fl

**Properties**

|                                               |                    |
|-----------------------------------------------|--------------------|
| Prio recon                                    | Off                |
| Load images to viewer                         | On                 |
| Inline movie                                  | Off                |
| Auto store images                             | On                 |
| Load images to stamp segments                 | On                 |
| Load images to graphic segments               | On                 |
| Auto open inline display                      | Off                |
| Auto close inline display                     | Off                |
| Start measurement without further preparation | Off                |
| Wait for user to start                        | Off                |
| Start measurements                            | Single measurement |

**Routine**

|                    |                     |
|--------------------|---------------------|
| Slab group         | 1                   |
| Slabs              | 1                   |
| Dist. factor       | 20 %                |
| Position           | L0.0 A22.2 F11.5 mm |
| Orientation        | Sagittal            |
| Phase enc. dir.    | A >> P              |
| Phase oversampling | 0 %                 |
| Slice oversampling | 0.0 %               |
| Slices per slab    | 128                 |
| FoV read           | 260 mm              |
| FoV phase          | 100.0 %             |
| Slice thickness    | 1.6 mm              |
| TR                 | 3.25 ms             |
| TE                 | 1.53 ms             |
| Averages           | 1                   |
| Concatenations     | 1                   |
| Filter             | None                |
| Coil elements      | OCC;PFC             |

**Contrast - Common**

|            |         |
|------------|---------|
| TR         | 3.25 ms |
| TE         | 1.53 ms |
| Flip angle | 16 deg  |

**Contrast - Dynamic**

|                |            |
|----------------|------------|
| Averages       | 1          |
| Averaging mode | Short term |
| Reconstruction | Magnitude  |
| Measurements   | 1          |

**Resolution - Common**

|                       |           |
|-----------------------|-----------|
| FoV read              | 260 mm    |
| FoV phase             | 100.0 %   |
| Slice thickness       | 1.6 mm    |
| Base resolution       | 160       |
| Phase resolution      | 100 %     |
| Slice resolution      | 69 %      |
| Phase partial Fourier | 6/8       |
| Slice partial Fourier | 6/8       |
| Trajectory            | Cartesian |

**Resolution - iPAT**

|                  |        |
|------------------|--------|
| PAT mode         | GRAPPA |
| Accel. factor PE | 2      |
| Ref. lines PE    | 24     |
| Accel. factor 3D | 1      |

**Resolution - iPAT**

|                     |            |
|---------------------|------------|
| Reference scan mode | Integrated |
|---------------------|------------|

**Resolution - Filter Image**

|                   |     |
|-------------------|-----|
| Image Filter      | Off |
| Distortion Corr.  | Off |
| Prescan Normalize | Off |
| Normalize         | Off |
| B1 filter         | Off |

**Resolution - Filter Rawdata**

|                   |     |
|-------------------|-----|
| Raw filter        | Off |
| Elliptical filter | Off |

**Geometry - Common**

|                    |                     |
|--------------------|---------------------|
| Slab group         | 1                   |
| Slabs              | 1                   |
| Dist. factor       | 20 %                |
| Position           | L0.0 A22.2 F11.5 mm |
| Orientation        | Sagittal            |
| Phase enc. dir.    | A >> P              |
| Slice oversampling | 0.0 %               |
| Slices per slab    | 128                 |
| FoV read           | 260 mm              |
| FoV phase          | 100.0 %             |
| Slice thickness    | 1.6 mm              |
| TR                 | 3.25 ms             |
| Multi-slice mode   | Sequential          |
| Series             | Ascending           |
| Concatenations     | 1                   |

**Geometry - AutoAlign**

|                     |                     |
|---------------------|---------------------|
| Slab group          | 1                   |
| Position            | L0.0 A22.2 F11.5 mm |
| Orientation         | Sagittal            |
| Phase enc. dir.     | A >> P              |
| Initial Position    | Isocenter           |
| L                   | 0.0 mm              |
| P                   | 0.0 mm              |
| H                   | 0.0 mm              |
| Initial Rotation    | 0.00 deg            |
| Initial Orientation | Transversal         |

**Geometry - Tim Planning Suite**

|                   |      |
|-------------------|------|
| Set-n-Go Protocol | Off  |
| Table position    | H    |
| Table position    | 0 mm |
| Inline Composing  | Off  |

**System - Miscellaneous**

|                     |                     |
|---------------------|---------------------|
| Positioning mode    | REF                 |
| Table position      | H                   |
| Table position      | 0 mm                |
| MSMA                | S - C - T           |
| Sagittal            | R >> L              |
| Coronal             | A >> P              |
| Transversal         | F >> H              |
| Coil Combine Mode   | Adaptive Combine    |
| Save uncombined     | Off                 |
| Matrix Optimization | Off                 |
| Coil Select Mode    | On - AutoCoilSelect |



**System - Adjustments**

|                          |          |
|--------------------------|----------|
| B0 Shim mode             | Tune up  |
| B1 Shim mode             | TrueForm |
| Confirm freq. adjustment | Off      |
| Assume Dominant Fat      | Off      |
| Assume Silicone          | Off      |
| Adjustment Tolerance     | Auto     |

**System - Adjust Volume**

|             |             |
|-------------|-------------|
| Position    | Isocenter   |
| Orientation | Transversal |
| Rotation    | 0.00 deg    |
| A >> P      | 263 mm      |
| R >> L      | 350 mm      |
| F >> H      | 350 mm      |
| Reset       | Off         |

**System - Tx/Rx**

|                     |                |
|---------------------|----------------|
| Frequency 1H        | 297.207726 MHz |
| Correction factor   | 1              |
| Gain                | High           |
| Img. Scale Cor.     | 1.000          |
| Reset               | Off            |
| ? Ref. amplitude 1H | 0.000 V        |

**Physio - PACE**

|                |     |
|----------------|-----|
| Resp. control  | Off |
| Concatenations | 1   |

**Inline - Common**

|                |        |
|----------------|--------|
| Flip angle     | 16 deg |
| Measurements   | 1      |
| Time to center | 7.7 s  |

**Inline - Inline**

|                      |     |
|----------------------|-----|
| Subtract             | Off |
| Measurements         | 1   |
| StdDev               | Off |
| Save original images | On  |

**Inline - MIP**

|                      |     |
|----------------------|-----|
| MIP-Sag              | Off |
| MIP-Cor              | Off |
| MIP-Tra              | Off |
| MIP-Time             | Off |
| Save original images | On  |

**Inline - Composing**

|                  |     |
|------------------|-----|
| Inline Composing | Off |
| Distortion Corr. | Off |

**Inline - MapIt**

|                      |         |
|----------------------|---------|
| Save original images | On      |
| MapIt                | None    |
| Flip angle           | 16 deg  |
| Measurements         | 1       |
| Contrasts            | 1       |
| TR                   | 3.25 ms |
| TE                   | 1.53 ms |

**Sequence - Part 1**

|                 |      |
|-----------------|------|
| Introduction    | On   |
| Dimension       | 3D   |
| Asymmetric echo | Weak |

**Sequence - Part 1**

|                  |            |
|------------------|------------|
| Contrasts        | 1          |
| Multi-slice mode | Sequential |
| Bandwidth        | 540 Hz/Px  |

**Sequence - Part 2**

|               |          |
|---------------|----------|
| RF pulse type | Fast     |
| Gradient mode | Normal   |
| Excitation    | Non-sel. |
| RF spoiling   | On       |

**Sequence - Nuclei**

|                       |         |
|-----------------------|---------|
| TX/RX Nucleus         | 1H      |
| TX/RX delta frequency | 0 Hz    |
| TX Nucleus            | None    |
| TX delta frequency    | 0 Hz    |
| Coil elements         | OCC;PFC |

**Sequence - Assistant**

|      |     |
|------|-----|
| Mode | Off |
|------|-----|

\\USER\PHCP\MRS\final\localizer aligned

TA: 0:28 PM: FIX Voxel size: 0.5×0.5×5.0 mmPAT: Off Rel. SNR: 1.00 : qfl

**Properties**

|                                               |                    |
|-----------------------------------------------|--------------------|
| Prio recon                                    | Off                |
| Load images to viewer                         | On                 |
| Inline movie                                  | Off                |
| Auto store images                             | On                 |
| Load images to stamp segments                 | On                 |
| Load images to graphic segments               | On                 |
| Auto open inline display                      | Off                |
| Auto close inline display                     | Off                |
| Start measurement without further preparation | On                 |
| Wait for user to start                        | Off                |
| Start measurements                            | Single measurement |

**Routine**

|                    |                   |
|--------------------|-------------------|
| Slice group        | 1                 |
| Slices             | 5                 |
| Dist. factor       | 400 %             |
| Position           | Isocenter         |
| Orientation        | Coronal           |
| Phase enc. dir.    | R >> L            |
| Slice group        | 2                 |
| Slices             | 5                 |
| Dist. factor       | 600 %             |
| Position           | Isocenter         |
| Orientation        | Transversal       |
| Phase enc. dir.    | L >> R            |
| Slice group        | 3                 |
| Slices             | 5                 |
| Dist. factor       | 300 %             |
| Position           | Isocenter         |
| Orientation        | Sagittal          |
| Phase enc. dir.    | A >> P            |
| AutoAlign          | Head > Brain      |
| Phase oversampling | 0 %               |
| FoV read           | 250 mm            |
| FoV phase          | 100.0 %           |
| Slice thickness    | 5.0 mm            |
| TR                 | 7.6 ms            |
| TE                 | 2.67 ms           |
| Averages           | 1                 |
| Concatenations     | 15                |
| Filter             | Elliptical filter |
| Coil elements      | OCC;PFC           |

**Contrast - Common**

|                   |         |
|-------------------|---------|
| TR                | 7.6 ms  |
| TE                | 2.67 ms |
| TD                | 0 ms    |
| MTC               | Off     |
| Magn. preparation | None    |
| Flip angle        | 10 deg  |
| Fat suppr.        | None    |
| Water suppr.      | None    |
| SWI               | Off     |

**Contrast - Dynamic**

|                |            |
|----------------|------------|
| Averages       | 1          |
| Averaging mode | Short term |
| Reconstruction | Magnitude  |
| Measurements   | 1          |

**Contrast - Dynamic**

|                 |                  |
|-----------------|------------------|
| Multiple series | Each measurement |
|-----------------|------------------|

**Resolution - Common**

|                       |         |
|-----------------------|---------|
| FoV read              | 250 mm  |
| FoV phase             | 100.0 % |
| Slice thickness       | 5.0 mm  |
| Base resolution       | 256     |
| Phase resolution      | 90 %    |
| Phase partial Fourier | Off     |
| Interpolation         | On      |

**Resolution - iPAT**

|          |      |
|----------|------|
| PAT mode | None |
|----------|------|

**Resolution - Filter Image**

|                   |     |
|-------------------|-----|
| Image Filter      | Off |
| Distortion Corr.  | Off |
| Prescan Normalize | Off |
| Normalize         | Off |
| B1 filter         | Off |

**Resolution - Filter Rawdata**

|                   |     |
|-------------------|-----|
| Raw filter        | Off |
| Elliptical filter | On  |

**Geometry - Common**

|                  |             |
|------------------|-------------|
| Slice group      | 1           |
| Slices           | 5           |
| Dist. factor     | 400 %       |
| Position         | Isocenter   |
| Orientation      | Coronal     |
| Phase enc. dir.  | R >> L      |
| Slice group      | 2           |
| Slices           | 5           |
| Dist. factor     | 600 %       |
| Position         | Isocenter   |
| Orientation      | Transversal |
| Phase enc. dir.  | L >> R      |
| Slice group      | 3           |
| Slices           | 5           |
| Dist. factor     | 300 %       |
| Position         | Isocenter   |
| Orientation      | Sagittal    |
| Phase enc. dir.  | A >> P      |
| FoV read         | 250 mm      |
| FoV phase        | 100.0 %     |
| Slice thickness  | 5.0 mm      |
| TR               | 7.6 ms      |
| Multi-slice mode | Sequential  |
| Series           | Interleaved |
| Concatenations   | 15          |

**Geometry - AutoAlign**

|                 |             |
|-----------------|-------------|
| Slice group     | 1           |
| Position        | Isocenter   |
| Orientation     | Coronal     |
| Phase enc. dir. | R >> L      |
| Slice group     | 2           |
| Position        | Isocenter   |
| Orientation     | Transversal |

**Geometry - AutoAlign**

|                     |              |
|---------------------|--------------|
| Phase enc. dir.     | L >> R       |
| Slice group         | 3            |
| Position            | Isocenter    |
| Orientation         | Sagittal     |
| Phase enc. dir.     | A >> P       |
| AutoAlign           | Head > Brain |
| Initial Position    | Isocenter    |
| L                   | 0.0 mm       |
| P                   | 0.0 mm       |
| H                   | 0.0 mm       |
| Initial Rotation    | 0.00 deg     |
| Initial Orientation | Coronal      |

**Geometry - Saturation**

|                 |          |
|-----------------|----------|
| Saturation mode | Standard |
| Fat suppr.      | None     |
| Water suppr.    | None     |
| Special sat.    | None     |

**Geometry - Tim Planning Suite**

|                   |      |
|-------------------|------|
| Set-n-Go Protocol | Off  |
| Table position    | H    |
| Table position    | 0 mm |
| Inline Composing  | Off  |

**Geometry - Tim CT**

|                 |         |
|-----------------|---------|
| Tim CT mode     | Off     |
| Slices          | 5       |
| Slice thickness | 5.0 mm  |
| Dist. factor    | 300 %   |
| FoV read        | 250 mm  |
| FoV phase       | 100.0 % |
| Segments        | 1       |

**System - Miscellaneous**

|                     |                      |
|---------------------|----------------------|
| Positioning mode    | FIX                  |
| Table position      | F                    |
| Table position      | 0 mm                 |
| MSMA                | S - C - T            |
| Sagittal            | R >> L               |
| Coronal             | A >> P               |
| Transversal         | F >> H               |
| Coil Combine Mode   | Adaptive Combine     |
| Save uncombined     | Off                  |
| Matrix Optimization | Off                  |
| AutoAlign           | Head > Brain         |
| Coil Select Mode    | Off - AutoCoilSelect |

**System - Adjustments**

|                          |          |
|--------------------------|----------|
| B0 Shim mode             | Tune up  |
| B1 Shim mode             | TrueForm |
| Confirm freq. adjustment | Off      |
| Assume Dominant Fat      | Off      |
| Assume Silicone          | Off      |
| Adjustment Tolerance     | Auto     |

**System - Adjust Volume**

|             |             |
|-------------|-------------|
| Position    | Isocenter   |
| Orientation | Transversal |
| Rotation    | 0.00 deg    |
| A >> P      | 263 mm      |
| R >> L      | 350 mm      |
| F >> H      | 350 mm      |
| Reset       | Off         |

**System - Tx/Rx**

|                     |                |
|---------------------|----------------|
| Frequency 1H        | 297.207726 MHz |
| Correction factor   | 1              |
| Gain                | High           |
| Img. Scale Cor.     | 1.000          |
| Reset               | Off            |
| ? Ref. amplitude 1H | 0.000 V        |

**Physio - Signal1**

|                 |        |
|-----------------|--------|
| 1st Signal/Mode | None   |
| TR              | 7.6 ms |
| Concatenations  | 15     |
| Segments        | 1      |

**Physio - Cardiac**

|                   |         |
|-------------------|---------|
| Tagging           | None    |
| Magn. preparation | None    |
| Fat suppr.        | None    |
| Dark blood        | Off     |
| FoV read          | 250 mm  |
| FoV phase         | 100.0 % |
| Phase resolution  | 90 %    |

**Physio - PACE**

|                |     |
|----------------|-----|
| Resp. control  | Off |
| Concatenations | 15  |

**Inline - Common**

|                      |     |
|----------------------|-----|
| Subtract             | Off |
| Measurements         | 1   |
| StdDev               | Off |
| Liver registration   | Off |
| Save original images | On  |

**Inline - MIP**

|                      |     |
|----------------------|-----|
| MIP-Sag              | Off |
| MIP-Cor              | Off |
| MIP-Tra              | Off |
| MIP-Time             | Off |
| Save original images | On  |

**Inline - Soft Tissue**

|              |     |
|--------------|-----|
| Wash - In    | Off |
| Wash - Out   | Off |
| TTP          | Off |
| PEI          | Off |
| MIP - time   | Off |
| Measurements | 1   |

**Inline - Composing**

|                  |     |
|------------------|-----|
| Inline Composing | Off |
| Distortion Corr. | Off |

**Inline - MapIt**

|                      |         |
|----------------------|---------|
| Save original images | On      |
| MapIt                | None    |
| Flip angle           | 10 deg  |
| Measurements         | 1       |
| Contrasts            | 1       |
| TR                   | 7.6 ms  |
| TE                   | 2.67 ms |

**Sequence - Part 1**

|              |    |
|--------------|----|
| Introduction | On |
|--------------|----|

**Sequence - Part 1**

|                     |            |
|---------------------|------------|
| Dimension           | 2D         |
| Phase stabilisation | Off        |
| Asymmetric echo     | Allowed    |
| Contrasts           | 1          |
| Flow comp.          | No         |
| Multi-slice mode    | Sequential |
| Bandwidth           | 320 Hz/Px  |

**Sequence - Part 2**

|                          |            |
|--------------------------|------------|
| Segments                 | 1          |
| Acoustic noise reduction | Active     |
| RF pulse type            | Normal     |
| Gradient mode            | Normal     |
| Excitation               | Slice-sel. |
| RF spoiling              | On         |

**Sequence - Nuclei**

|                       |         |
|-----------------------|---------|
| TX/RX Nucleus         | 1H      |
| TX/RX delta frequency | 0 Hz    |
| TX Nucleus            | None    |
| TX delta frequency    | 0 Hz    |
| Coil elements         | OCC;PFC |

**Sequence - Assistant**

|      |     |
|------|-----|
| Mode | Off |
|------|-----|

\\USER\PHCP\MRS\final\PFC t1inplane 64sl occ 1p25iso 2p5sTR 160FOV

TA: 4:02 PM: FIX Voxel size: 1.3×1.3×1.3 mmPAT: Off Rel. SNR: 1.00 : tfl

**Properties**

|                                               |                    |
|-----------------------------------------------|--------------------|
| Prio recon                                    | Off                |
| Load images to viewer                         | On                 |
| Inline movie                                  | Off                |
| Auto store images                             | On                 |
| Load images to stamp segments                 | On                 |
| Load images to graphic segments               | On                 |
| Auto open inline display                      | Off                |
| Auto close inline display                     | Off                |
| Start measurement without further preparation | Off                |
| Wait for user to start                        | Off                |
| Start measurements                            | Single measurement |

**Routine**

|                    |                   |
|--------------------|-------------------|
| Slab group         | 1                 |
| Slabs              | 1                 |
| Dist. factor       | 50 %              |
| Position           | L1.8 A1.2 H7.3 mm |
| Orientation        | Sagittal          |
| Phase enc. dir.    | A >> P            |
| AutoAlign          | Head > Brain      |
| Phase oversampling | 0 %               |
| Slice oversampling | 0.0 %             |
| Slices per slab    | 64                |
| FoV read           | 160 mm            |
| FoV phase          | 100.0 %           |
| Slice thickness    | 1.25 mm           |
| TR                 | 2500.0 ms         |
| TE                 | 3.2 ms            |
| Averages           | 1                 |
| Concatenations     | 1                 |
| Filter             | None              |
| Coil elements      | PFC               |

**Contrast - Common**

|                   |             |
|-------------------|-------------|
| TR                | 2500.0 ms   |
| TE                | 3.2 ms      |
| Magn. preparation | Non-sel. IR |
| T1                | 1500 ms     |
| Flip angle        | 5.0 deg     |
| Fat suppr.        | None        |
| Water suppr.      | None        |

**Contrast - Dynamic**

|                 |                  |
|-----------------|------------------|
| Averages        | 1                |
| Averaging mode  | Long term        |
| Reconstruction  | Magnitude        |
| Measurements    | 1                |
| Multiple series | Each measurement |

**Resolution - Common**

|                       |         |
|-----------------------|---------|
| FoV read              | 160 mm  |
| FoV phase             | 100.0 % |
| Slice thickness       | 1.25 mm |
| Base resolution       | 128     |
| Phase resolution      | 100 %   |
| Slice resolution      | 100 %   |
| Phase partial Fourier | 6/8     |
| Slice partial Fourier | Off     |
| Interpolation         | Off     |

**Resolution - iPAT**

|          |      |
|----------|------|
| PAT mode | None |
|----------|------|

**Resolution - Filter Image**

|                   |     |
|-------------------|-----|
| Image Filter      | Off |
| Distortion Corr.  | Off |
| Prescan Normalize | Off |
| Normalize         | Off |
| B1 filter         | Off |

**Resolution - Filter Rawdata**

|                   |     |
|-------------------|-----|
| Raw filter        | Off |
| Elliptical filter | Off |

**Geometry - Common**

|                    |                   |
|--------------------|-------------------|
| Slab group         | 1                 |
| Slabs              | 1                 |
| Dist. factor       | 50 %              |
| Position           | L1.8 A1.2 H7.3 mm |
| Orientation        | Sagittal          |
| Phase enc. dir.    | A >> P            |
| Slice oversampling | 0.0 %             |
| Slices per slab    | 64                |
| FoV read           | 160 mm            |
| FoV phase          | 100.0 %           |
| Slice thickness    | 1.25 mm           |
| TR                 | 2500.0 ms         |
| Multi-slice mode   | Single shot       |
| Series             | Ascending         |
| Concatenations     | 1                 |

**Geometry - AutoAlign**

|                     |                   |
|---------------------|-------------------|
| Slab group          | 1                 |
| Position            | L1.8 A1.2 H7.3 mm |
| Orientation         | Sagittal          |
| Phase enc. dir.     | A >> P            |
| AutoAlign           | Head > Brain      |
| Initial Position    | L1.8 A1.2 H7.3    |
| L                   | 1.8 mm            |
| A                   | 1.2 mm            |
| H                   | 7.3 mm            |
| Initial Rotation    | 0.00 deg          |
| Initial Orientation | Sagittal          |

**Geometry - Navigator****Geometry - Tim Planning Suite**

|                   |      |
|-------------------|------|
| Set-n-Go Protocol | Off  |
| Table position    | H    |
| Table position    | 0 mm |
| Inline Composing  | Off  |

**System - Miscellaneous**

|                   |                  |
|-------------------|------------------|
| Positioning mode  | FIX              |
| Table position    | H                |
| Table position    | 0 mm             |
| MSMA              | S - C - T        |
| Sagittal          | R >> L           |
| Coronal           | A >> P           |
| Transversal       | F >> H           |
| Coil Combine Mode | Adaptive Combine |

**System - Miscellaneous**

|                     |              |
|---------------------|--------------|
| Save uncombined     | Off          |
| Matrix Optimization | Off          |
| AutoAlign           | Head > Brain |
| Coil Select Mode    | Off - All    |

**System - Adjustments**

|                          |          |
|--------------------------|----------|
| B0 Shim mode             | Tune up  |
| B1 Shim mode             | TrueForm |
| Confirm freq. adjustment | Off      |
| Assume Dominant Fat      | Off      |
| Assume Silicone          | Off      |
| Adjustment Tolerance     | Auto     |

**System - Adjust Volume**

|               |                     |
|---------------|---------------------|
| ! Position    | L1.8 P18.8 H15.1 mm |
| ! Orientation | T > C-18.8          |
| ! Rotation    | 0.00 deg            |
| ! A >> P      | 64 mm               |
| ! R >> L      | 148 mm              |
| ! F >> H      | 82 mm               |
| Reset         | Off                 |

**System - Tx/Rx**

|                     |                |
|---------------------|----------------|
| Frequency 1H        | 297.207726 MHz |
| Correction factor   | 1              |
| Gain                | High           |
| Img. Scale Cor.     | 1.000          |
| Reset               | Off            |
| ? Ref. amplitude 1H | 0.000 V        |

**Physio - Signal1**

|                 |           |
|-----------------|-----------|
| 1st Signal/Mode | None      |
| TR              | 2500.0 ms |
| Concatenations  | 1         |

**Physio - Cardiac**

|                   |             |
|-------------------|-------------|
| Magn. preparation | Non-sel. IR |
| TI                | 1500 ms     |
| Fat suppr.        | None        |
| Dark blood        | Off         |
| FoV read          | 160 mm      |
| FoV phase         | 100.0 %     |
| Phase resolution  | 100 %       |

**Physio - PACE**

|                |     |
|----------------|-----|
| Resp. control  | Off |
| Concatenations | 1   |

**Inline - Common**

|                      |     |
|----------------------|-----|
| Subtract             | Off |
| Measurements         | 1   |
| StdDev               | Off |
| Save original images | On  |

**Inline - MIP**

|                      |     |
|----------------------|-----|
| MIP-Sag              | Off |
| MIP-Cor              | Off |
| MIP-Tra              | Off |
| MIP-Time             | Off |
| Save original images | On  |

**Inline - Composing**

|                  |     |
|------------------|-----|
| Inline Composing | Off |
|------------------|-----|

**Inline - Composing**

|                  |     |
|------------------|-----|
| Distortion Corr. | Off |
|------------------|-----|

**Inline - MapIt**

|                      |           |
|----------------------|-----------|
| Save original images | On        |
| MapIt                | None      |
| Flip angle           | 5.0 deg   |
| Measurements         | 1         |
| TR                   | 2500.0 ms |
| TE                   | 3.2 ms    |

**Sequence - Part 1**

|                     |             |
|---------------------|-------------|
| Introduction        | On          |
| Dimension           | 3D          |
| Elliptical scanning | Off         |
| Reordering          | Linear      |
| Asymmetric echo     | Allowed     |
| Flow comp.          | No          |
| Multi-slice mode    | Single shot |
| Echo spacing        | 7.9 ms      |
| Bandwidth           | 180 Hz/Px   |

**Sequence - Part 2**

|                         |           |
|-------------------------|-----------|
| RF pulse type           | Normal    |
| Gradient mode           | Normal    |
| Excitation              | Slab-sel. |
| RF spoiling             | On        |
| Incr. Gradient spoiling | Off       |
| Turbo factor            | 64        |

**Sequence - Nuclei**

|                       |      |
|-----------------------|------|
| TX/RX Nucleus         | 1H   |
| TX/RX delta frequency | 0 Hz |
| TX Nucleus            | None |
| TX delta frequency    | 0 Hz |
| Coil elements         | PFC  |

**Sequence - Assistant**

|      |     |
|------|-----|
| Mode | Off |
|------|-----|

\USER\PHCP\MRS\final\PFC fastestmap lin

TA: 6.1 s PM: FIX Vol: 30 ×30 ×15 mmRel. SNR: 1.00 : fastmp

**Properties**

|                                               |                    |
|-----------------------------------------------|--------------------|
| Prio recon                                    | Off                |
| Load images to viewer                         | On                 |
| Inline movie                                  | Off                |
| Auto store images                             | On                 |
| Load images to stamp segments                 | Off                |
| Load images to graphic segments               | Off                |
| Auto open inline display                      | On                 |
| Auto close inline display                     | Off                |
| Start measurement without further preparation | Off                |
| Wait for user to start                        | Off                |
| Start measurements                            | Single measurement |

**Routine**

|               |                    |
|---------------|--------------------|
| Position      | L1.2 P49.6 H8.9 mm |
| Orientation   | C > T30.0          |
| Rotation      | 0 deg              |
| Vol F >> H    | 30 mm              |
| Vol F >> H    | 30 mm              |
| Vol A >> P    | 15 mm              |
| TR            | 2000 ms            |
| TE            | 46.00 ms           |
| Averages      | 1                  |
| Filter        | None               |
| Coil elements | PFC                |

**Contrast**

|                    |          |
|--------------------|----------|
| TR                 | 2000 ms  |
| TE                 | 46.00 ms |
| Tau                | 5.00 ms  |
| Averages           | 1        |
| Excite flip angle  | 90 deg   |
| Refocus flip angle | 180 deg  |
| Measurements       | 1        |

**Resolution - Common**

|             |     |
|-------------|-----|
| Vector size | 256 |
|-------------|-----|

**Geometry - Common**

|             |                    |
|-------------|--------------------|
| Position    | L1.2 P49.6 H8.9 mm |
| Orientation | C > T30.0          |
| Rotation    | 0 deg              |
| Vol F >> H  | 30 mm              |
| Vol R >> L  | 30 mm              |
| Vol A >> P  | 15 mm              |

**Geometry - AutoAlign**

|                     |                 |
|---------------------|-----------------|
| AutoAlign           | Head > Brain    |
| Initial Position    | L1.2 P49.6 H8.9 |
| L                   | 1.2 mm          |
| P                   | 49.6 mm         |
| H                   | 8.9 mm          |
| Initial Rotation    | 0.00 deg        |
| Initial Orientation | C > T           |
| C > T               | 30.0            |
| > S                 | 0.0             |

**System - Miscellaneous**

|                  |     |
|------------------|-----|
| Positioning mode | FIX |
| Table position   | H   |

**System - Miscellaneous**

|                  |                      |
|------------------|----------------------|
| Table position   | 0 mm                 |
| MSMA             | S - C - T            |
| Sagittal         | R >> L               |
| Coronal          | A >> P               |
| Transversal      | F >> H               |
| Save uncombined  | Off                  |
| AutoAlign        | Head > Brain         |
| Coil Select Mode | Off - AutoCoilSelect |

**System - Adjustments**

|                          |          |
|--------------------------|----------|
| B0 Shim mode             | Tune up  |
| B1 Shim mode             | TrueForm |
| Adj. water suppr.        | Off      |
| Confirm freq. adjustment | Off      |
| Assume Dominant Fat      | Off      |
| Assume Silicone          | Off      |
| Adjustment Tolerance     | Auto     |

**System - Adjust Volume**

|             |                    |
|-------------|--------------------|
| Position    | L1.2 P49.6 H8.9 mm |
| Orientation | C > T30.0          |
| Rotation    | 0.00 deg           |
| R >> L      | 30 mm              |
| F >> H      | 30 mm              |
| A >> P      | 15 mm              |
| Reset       | Off                |

**System - Tx/Rx**

|                     |                |
|---------------------|----------------|
| Frequency 1H        | 297.207726 MHz |
| Correction factor   | 1              |
| Gain                | High           |
| Img. Scale Cor.     | 1.000          |
| Reset               | Off            |
| ? Ref. amplitude 1H | 0.000 V        |

**Physio - Signal1**

|                 |         |
|-----------------|---------|
| 1st Signal/Mode | None    |
| TR              | 2000 ms |

**Sequence - Common**

|                      |           |
|----------------------|-----------|
| Delta frequency      | 0.0 ppm   |
| Phase cycling        | None      |
| Bandwidth            | 100000 Hz |
| Acquisition duration | 2 ms      |

**Sequence - Special**

|                         |                             |
|-------------------------|-----------------------------|
| Type of fit             | Linear 3-proj               |
| Vol fit factor          | 100 %                       |
| Force spherical fit Vol | Off Force spherical fit Vol |
| Save plots to database  | Off                         |
| Refocus pulses          | Normal                      |
| Excite pulse duration   | 6400 us                     |
| Refocus pulse duration  | 5120 us                     |
| Bar FoV                 | 384 mm                      |
| Bar thickness           | 10.0 mm                     |
| Inversion pulse         | Off                         |
| Multi-echo acquisition  | On                          |
| Number of echoes        | 4                           |

\USER\PHCP\MRS\final\PFC fastestmap all

TA: 0:12 PM: FIX Vol: 30 ×30 ×15 mmRel. SNR: 1.00 : fastmp

**Properties**

|                                               |                    |
|-----------------------------------------------|--------------------|
| Prio recon                                    | Off                |
| Load images to viewer                         | On                 |
| Inline movie                                  | Off                |
| Auto store images                             | On                 |
| Load images to stamp segments                 | Off                |
| Load images to graphic segments               | Off                |
| Auto open inline display                      | On                 |
| Auto close inline display                     | Off                |
| Start measurement without further preparation | Off                |
| Wait for user to start                        | Off                |
| Start measurements                            | Single measurement |

**Routine**

|               |                    |
|---------------|--------------------|
| Position      | L1.2 P49.6 H8.9 mm |
| Orientation   | C > T30.0          |
| Rotation      | 0 deg              |
| Vol F >> H    | 30 mm              |
| Vol F >> H    | 30 mm              |
| Vol A >> P    | 15 mm              |
| TR            | 2000 ms            |
| TE            | 46.00 ms           |
| Averages      | 1                  |
| Filter        | None               |
| Coil elements | PFC                |

**Contrast**

|                    |          |
|--------------------|----------|
| TR                 | 2000 ms  |
| TE                 | 46.00 ms |
| Tau                | 5.00 ms  |
| Averages           | 1        |
| Excite flip angle  | 90 deg   |
| Refocus flip angle | 180 deg  |
| Measurements       | 1        |

**Resolution - Common**

|             |     |
|-------------|-----|
| Vector size | 256 |
|-------------|-----|

**Geometry - Common**

|             |                    |
|-------------|--------------------|
| Position    | L1.2 P49.6 H8.9 mm |
| Orientation | C > T30.0          |
| Rotation    | 0 deg              |
| Vol F >> H  | 30 mm              |
| Vol R >> L  | 30 mm              |
| Vol A >> P  | 15 mm              |

**Geometry - AutoAlign**

|                     |                 |
|---------------------|-----------------|
| AutoAlign           | Head > Brain    |
| Initial Position    | L1.2 P49.6 H8.9 |
| L                   | 1.2 mm          |
| P                   | 49.6 mm         |
| H                   | 8.9 mm          |
| Initial Rotation    | 0.00 deg        |
| Initial Orientation | C > T           |
| C > T               | 30.0            |
| > S                 | 0.0             |

**System - Miscellaneous**

|                  |     |
|------------------|-----|
| Positioning mode | FIX |
| Table position   | H   |

**System - Miscellaneous**

|                  |                      |
|------------------|----------------------|
| Table position   | 0 mm                 |
| MSMA             | S - C - T            |
| Sagittal         | R >> L               |
| Coronal          | A >> P               |
| Transversal      | F >> H               |
| Save uncombined  | Off                  |
| AutoAlign        | Head > Brain         |
| Coil Select Mode | Off - AutoCoilSelect |

**System - Adjustments**

|                          |          |
|--------------------------|----------|
| B0 Shim mode             | Tune up  |
| B1 Shim mode             | TrueForm |
| Adj. water suppr.        | Off      |
| Confirm freq. adjustment | Off      |
| Assume Dominant Fat      | Off      |
| Assume Silicone          | Off      |
| Adjustment Tolerance     | Auto     |

**System - Adjust Volume**

|             |                    |
|-------------|--------------------|
| Position    | L1.2 P49.6 H8.9 mm |
| Orientation | C > T30.0          |
| Rotation    | 0.00 deg           |
| R >> L      | 30 mm              |
| F >> H      | 30 mm              |
| A >> P      | 15 mm              |
| Reset       | Off                |

**System - Tx/Rx**

|                     |                |
|---------------------|----------------|
| Frequency 1H        | 297.207726 MHz |
| Correction factor   | 1              |
| Gain                | High           |
| Img. Scale Cor.     | 1.000          |
| Reset               | Off            |
| ? Ref. amplitude 1H | 0.000 V        |

**Physio - Signal1**

|                 |         |
|-----------------|---------|
| 1st Signal/Mode | None    |
| TR              | 2000 ms |

**Sequence - Common**

|                      |           |
|----------------------|-----------|
| Delta frequency      | 0.0 ppm   |
| Phase cycling        | None      |
| Bandwidth            | 100000 Hz |
| Acquisition duration | 2 ms      |

**Sequence - Special**

|                         |                             |
|-------------------------|-----------------------------|
| Type of fit             | Full 6-proj                 |
| Vol fit factor          | 100 %                       |
| Force spherical fit Vol | Off Force spherical fit Vol |
| Save plots to database  | Off                         |
| Refocus pulses          | Normal                      |
| Excite pulse duration   | 6400 us                     |
| Refocus pulse duration  | 5120 us                     |
| Bar FoV                 | 384 mm                      |
| Bar thickness           | 10.0 mm                     |
| Inversion pulse         | Off                         |
| Multi-echo acquisition  | On                          |
| Number of echoes        | 4                           |



\USER\PHCP\MRS\final\PFC fastestmap all

TA: 0:12 PM: FIX Vol: 30 ×30 ×15 mmRel. SNR: 1.00 : fastmp

**Properties**

|                                               |                    |
|-----------------------------------------------|--------------------|
| Prio recon                                    | Off                |
| Load images to viewer                         | On                 |
| Inline movie                                  | Off                |
| Auto store images                             | On                 |
| Load images to stamp segments                 | Off                |
| Load images to graphic segments               | Off                |
| Auto open inline display                      | Off                |
| Auto close inline display                     | Off                |
| Start measurement without further preparation | Off                |
| Wait for user to start                        | Off                |
| Start measurements                            | Single measurement |

**Routine**

|               |                    |
|---------------|--------------------|
| Position      | L1.2 P49.6 H8.9 mm |
| Orientation   | C > T30.0          |
| Rotation      | 0 deg              |
| Vol F >> H    | 30 mm              |
| Vol F >> H    | 30 mm              |
| Vol A >> P    | 15 mm              |
| TR            | 2000 ms            |
| TE            | 46.00 ms           |
| Averages      | 1                  |
| Filter        | None               |
| Coil elements | PFC                |

**Contrast**

|                    |          |
|--------------------|----------|
| TR                 | 2000 ms  |
| TE                 | 46.00 ms |
| Tau                | 5.00 ms  |
| Averages           | 1        |
| Excite flip angle  | 90 deg   |
| Refocus flip angle | 180 deg  |
| Measurements       | 1        |

**Resolution - Common**

|             |     |
|-------------|-----|
| Vector size | 256 |
|-------------|-----|

**Geometry - Common**

|             |                    |
|-------------|--------------------|
| Position    | L1.2 P49.6 H8.9 mm |
| Orientation | C > T30.0          |
| Rotation    | 0 deg              |
| Vol F >> H  | 30 mm              |
| Vol R >> L  | 30 mm              |
| Vol A >> P  | 15 mm              |

**Geometry - AutoAlign**

|                     |                 |
|---------------------|-----------------|
| AutoAlign           | Head > Brain    |
| Initial Position    | L1.2 P49.6 H8.9 |
| L                   | 1.2 mm          |
| P                   | 49.6 mm         |
| H                   | 8.9 mm          |
| Initial Rotation    | 0.00 deg        |
| Initial Orientation | C > T           |
| C > T               | 30.0            |
| > S                 | 0.0             |

**System - Miscellaneous**

|                  |     |
|------------------|-----|
| Positioning mode | FIX |
| Table position   | H   |

**System - Miscellaneous**

|                  |                      |
|------------------|----------------------|
| Table position   | 0 mm                 |
| MSMA             | S - C - T            |
| Sagittal         | R >> L               |
| Coronal          | A >> P               |
| Transversal      | F >> H               |
| Save uncombined  | Off                  |
| AutoAlign        | Head > Brain         |
| Coil Select Mode | Off - AutoCoilSelect |

**System - Adjustments**

|                          |          |
|--------------------------|----------|
| B0 Shim mode             | Tune up  |
| B1 Shim mode             | TrueForm |
| Adj. water suppr.        | Off      |
| Confirm freq. adjustment | Off      |
| Assume Dominant Fat      | Off      |
| Assume Silicone          | Off      |
| Adjustment Tolerance     | Auto     |

**System - Adjust Volume**

|             |                    |
|-------------|--------------------|
| Position    | L1.2 P49.6 H8.9 mm |
| Orientation | C > T30.0          |
| Rotation    | 0.00 deg           |
| R >> L      | 30 mm              |
| F >> H      | 30 mm              |
| A >> P      | 15 mm              |
| Reset       | Off                |

**System - Tx/Rx**

|                     |                |
|---------------------|----------------|
| Frequency 1H        | 297.207726 MHz |
| Correction factor   | 1              |
| Gain                | High           |
| Img. Scale Cor.     | 1.000          |
| Reset               | Off            |
| ? Ref. amplitude 1H | 0.000 V        |

**Physio - Signal1**

|                 |         |
|-----------------|---------|
| 1st Signal/Mode | None    |
| TR              | 2000 ms |

**Sequence - Common**

|                      |           |
|----------------------|-----------|
| Delta frequency      | 0.0 ppm   |
| Phase cycling        | None      |
| Bandwidth            | 100000 Hz |
| Acquisition duration | 2 ms      |

**Sequence - Special**

|                         |                             |
|-------------------------|-----------------------------|
| Type of fit             | Full 6-proj                 |
| Vol fit factor          | 100 %                       |
| Force spherical fit Vol | Off Force spherical fit Vol |
| Save plots to database  | Off                         |
| Refocus pulses          | Normal                      |
| Excite pulse duration   | 6400 us                     |
| Refocus pulse duration  | 5120 us                     |
| Bar FoV                 | 384 mm                      |
| Bar thickness           | 10.0 mm                     |
| Inversion pulse         | Off                         |
| Multi-echo acquisition  | On                          |
| Number of echoes        | 4                           |

\USER\PHCP\MRS\final\PFC fastestmap all

TA: 0:12 PM: FIX Vol: 30 ×30 ×15 mmRel. SNR: 1.00 : fastmp

**Properties**

|                                               |                    |
|-----------------------------------------------|--------------------|
| Prio recon                                    | Off                |
| Load images to viewer                         | On                 |
| Inline movie                                  | Off                |
| Auto store images                             | On                 |
| Load images to stamp segments                 | Off                |
| Load images to graphic segments               | Off                |
| Auto open inline display                      | Off                |
| Auto close inline display                     | Off                |
| Start measurement without further preparation | Off                |
| Wait for user to start                        | Off                |
| Start measurements                            | Single measurement |

**Routine**

|               |                    |
|---------------|--------------------|
| Position      | L1.2 P49.6 H8.9 mm |
| Orientation   | C > T30.0          |
| Rotation      | 0 deg              |
| Vol F >> H    | 30 mm              |
| Vol F >> H    | 30 mm              |
| Vol A >> P    | 15 mm              |
| TR            | 2000 ms            |
| TE            | 46.00 ms           |
| Averages      | 1                  |
| Filter        | None               |
| Coil elements | PFC                |

**Contrast**

|                    |          |
|--------------------|----------|
| TR                 | 2000 ms  |
| TE                 | 46.00 ms |
| Tau                | 5.00 ms  |
| Averages           | 1        |
| Excite flip angle  | 90 deg   |
| Refocus flip angle | 180 deg  |
| Measurements       | 1        |

**Resolution - Common**

|             |     |
|-------------|-----|
| Vector size | 256 |
|-------------|-----|

**Geometry - Common**

|             |                    |
|-------------|--------------------|
| Position    | L1.2 P49.6 H8.9 mm |
| Orientation | C > T30.0          |
| Rotation    | 0 deg              |
| Vol F >> H  | 30 mm              |
| Vol R >> L  | 30 mm              |
| Vol A >> P  | 15 mm              |

**Geometry - AutoAlign**

|                     |                 |
|---------------------|-----------------|
| AutoAlign           | Head > Brain    |
| Initial Position    | L1.2 P49.6 H8.9 |
| L                   | 1.2 mm          |
| P                   | 49.6 mm         |
| H                   | 8.9 mm          |
| Initial Rotation    | 0.00 deg        |
| Initial Orientation | C > T           |
| C > T               | 30.0            |
| > S                 | 0.0             |

**System - Miscellaneous**

|                  |     |
|------------------|-----|
| Positioning mode | FIX |
| Table position   | H   |

**System - Miscellaneous**

|                  |                      |
|------------------|----------------------|
| Table position   | 0 mm                 |
| MSMA             | S - C - T            |
| Sagittal         | R >> L               |
| Coronal          | A >> P               |
| Transversal      | F >> H               |
| Save uncombined  | Off                  |
| AutoAlign        | Head > Brain         |
| Coil Select Mode | Off - AutoCoilSelect |

**System - Adjustments**

|                          |          |
|--------------------------|----------|
| B0 Shim mode             | Tune up  |
| B1 Shim mode             | TrueForm |
| Adj. water suppr.        | Off      |
| Confirm freq. adjustment | Off      |
| Assume Dominant Fat      | Off      |
| Assume Silicone          | Off      |
| Adjustment Tolerance     | Auto     |

**System - Adjust Volume**

|             |                    |
|-------------|--------------------|
| Position    | L1.2 P49.6 H8.9 mm |
| Orientation | C > T30.0          |
| Rotation    | 0.00 deg           |
| R >> L      | 30 mm              |
| F >> H      | 30 mm              |
| A >> P      | 15 mm              |
| Reset       | Off                |

**System - Tx/Rx**

|                     |                |
|---------------------|----------------|
| Frequency 1H        | 297.207726 MHz |
| Correction factor   | 1              |
| Gain                | High           |
| Img. Scale Cor.     | 1.000          |
| Reset               | Off            |
| ? Ref. amplitude 1H | 0.000 V        |

**Physio - Signal1**

|                 |         |
|-----------------|---------|
| 1st Signal/Mode | None    |
| TR              | 2000 ms |

**Sequence - Common**

|                      |           |
|----------------------|-----------|
| Delta frequency      | 0.0 ppm   |
| Phase cycling        | None      |
| Bandwidth            | 100000 Hz |
| Acquisition duration | 2 ms      |

**Sequence - Special**

|                         |                             |
|-------------------------|-----------------------------|
| Type of fit             | Full 6-proj                 |
| Vol fit factor          | 100 %                       |
| Force spherical fit Vol | Off Force spherical fit Vol |
| Save plots to database  | Off                         |
| Refocus pulses          | Normal                      |
| Excite pulse duration   | 6400 us                     |
| Refocus pulse duration  | 5120 us                     |
| Bar FoV                 | 384 mm                      |
| Bar thickness           | 10.0 mm                     |
| Inversion pulse         | Off                         |
| Multi-echo acquisition  | On                          |
| Number of echoes        | 4                           |

## \\USER\PHCP\MRS\final\PFC fastestmap lin6

TA: 0:24 PM: FIX Vol: 30 ×30 ×15 mmRel. SNR: 1.00 : fastmp

**Properties**

|                                               |                    |
|-----------------------------------------------|--------------------|
| Prio recon                                    | Off                |
| Load images to viewer                         | On                 |
| Inline movie                                  | Off                |
| Auto store images                             | On                 |
| Load images to stamp segments                 | Off                |
| Load images to graphic segments               | Off                |
| Auto open inline display                      | On                 |
| Auto close inline display                     | Off                |
| Start measurement without further preparation | Off                |
| Wait for user to start                        | Off                |
| Start measurements                            | Single measurement |

**Routine**

|               |                    |
|---------------|--------------------|
| Position      | L1.2 P49.6 H8.9 mm |
| Orientation   | C > T30.0          |
| Rotation      | 0 deg              |
| Vol F >> H    | 30 mm              |
| Vol F >> H    | 30 mm              |
| Vol A >> P    | 15 mm              |
| TR            | 2000 ms            |
| TE            | 46.00 ms           |
| Averages      | 1                  |
| Filter        | None               |
| Coil elements | PFC                |

**Contrast**

|                    |          |
|--------------------|----------|
| TR                 | 2000 ms  |
| TE                 | 46.00 ms |
| Tau                | 20.00 ms |
| Averages           | 1        |
| Excite flip angle  | 90 deg   |
| Refocus flip angle | 180 deg  |
| Measurements       | 1        |

**Resolution - Common**

|             |     |
|-------------|-----|
| Vector size | 256 |
|-------------|-----|

**Geometry - Common**

|             |                    |
|-------------|--------------------|
| Position    | L1.2 P49.6 H8.9 mm |
| Orientation | C > T30.0          |
| Rotation    | 0 deg              |
| Vol F >> H  | 30 mm              |
| Vol R >> L  | 30 mm              |
| Vol A >> P  | 15 mm              |

**Geometry - AutoAlign**

|                     |                 |
|---------------------|-----------------|
| AutoAlign           | Head > Brain    |
| Initial Position    | L1.2 P49.6 H8.9 |
| L                   | 1.2 mm          |
| P                   | 49.6 mm         |
| H                   | 8.9 mm          |
| Initial Rotation    | 0.00 deg        |
| Initial Orientation | C > T           |
| C > T               | 30.0            |
| > S                 | 0.0             |

**System - Miscellaneous**

|                  |     |
|------------------|-----|
| Positioning mode | FIX |
| Table position   | H   |

**System - Miscellaneous**

|                  |                      |
|------------------|----------------------|
| Table position   | 0 mm                 |
| MSMA             | S - C - T            |
| Sagittal         | R >> L               |
| Coronal          | A >> P               |
| Transversal      | F >> H               |
| Save uncombined  | Off                  |
| AutoAlign        | Head > Brain         |
| Coil Select Mode | Off - AutoCoilSelect |

**System - Adjustments**

|                          |          |
|--------------------------|----------|
| B0 Shim mode             | Tune up  |
| B1 Shim mode             | TrueForm |
| Adj. water suppr.        | Off      |
| Confirm freq. adjustment | Off      |
| Assume Dominant Fat      | Off      |
| Assume Silicone          | Off      |
| Adjustment Tolerance     | Auto     |

**System - Adjust Volume**

|             |                    |
|-------------|--------------------|
| Position    | L1.2 P49.6 H8.9 mm |
| Orientation | C > T30.0          |
| Rotation    | 0.00 deg           |
| R >> L      | 30 mm              |
| F >> H      | 30 mm              |
| A >> P      | 15 mm              |
| Reset       | Off                |

**System - Tx/Rx**

|                     |                |
|---------------------|----------------|
| Frequency 1H        | 297.207726 MHz |
| Correction factor   | 1              |
| Gain                | High           |
| Img. Scale Cor.     | 1.000          |
| Reset               | Off            |
| ? Ref. amplitude 1H | 0.000 V        |

**Physio - Signal1**

|                 |         |
|-----------------|---------|
| 1st Signal/Mode | None    |
| TR              | 2000 ms |

**Sequence - Common**

|                      |           |
|----------------------|-----------|
| Delta frequency      | 0.0 ppm   |
| Phase cycling        | None      |
| Bandwidth            | 100000 Hz |
| Acquisition duration | 2 ms      |

**Sequence - Special**

|                         |                             |
|-------------------------|-----------------------------|
| Type of fit             | Linear 6-proj               |
| Vol fit factor          | 100 %                       |
| Force spherical fit Vol | Off Force spherical fit Vol |
| Save plots to database  | Off                         |
| Refocus pulses          | Normal                      |
| Excite pulse duration   | 6400 us                     |
| Refocus pulse duration  | 5120 us                     |
| Bar FoV                 | 384 mm                      |
| Bar thickness           | 10.0 mm                     |
| Inversion pulse         | Off                         |
| Multi-echo acquisition  | Off                         |

## \\USER\PHCP\MRS\final\PFC linewidth check

TA: 0:23 PM: FIX Vol: 30 ×30 ×15 mmRel. SNR: 1.00 : steam

**Properties**

|                                               |                    |
|-----------------------------------------------|--------------------|
| Prio recon                                    | Off                |
| Load images to viewer                         | On                 |
| Inline movie                                  | Off                |
| Auto store images                             | On                 |
| Load images to stamp segments                 | Off                |
| Load images to graphic segments               | Off                |
| Auto open inline display                      | Off                |
| Auto close inline display                     | Off                |
| Start measurement without further preparation | Off                |
| Wait for user to start                        | Off                |
| Start measurements                            | Single measurement |

**Routine**

|               |                    |
|---------------|--------------------|
| Position      | L1.2 P49.6 H8.9 mm |
| Orientation   | C > T30.0          |
| Rotation      | 0 deg              |
| Vol F >> H    | 30 mm              |
| Vol F >> H    | 30 mm              |
| Vol A >> P    | 15 mm              |
| TR            | 5000 ms            |
| TE            | 8.00 ms            |
| Averages      | 1                  |
| Filter        | None               |
| Coil elements | PFC                |

**Contrast**

|                     |              |
|---------------------|--------------|
| TR                  | 5000 ms      |
| TE                  | 8.00 ms      |
| TM                  | 32.00 ms     |
| Averages            | 1            |
| Flip angle          | 90 deg       |
| VAPOR               | Only RF off  |
| VAPOR suppr.        | Water suppr. |
| Water s. BW         | 135 Hz       |
| Water s. delta pos. | 0.00 ppm     |
| Measurements        | 1            |

**Resolution - Common**

|             |      |
|-------------|------|
| Vector size | 2048 |
|-------------|------|

**Geometry - Common**

|             |                    |
|-------------|--------------------|
| Position    | L1.2 P49.6 H8.9 mm |
| Orientation | C > T30.0          |
| Rotation    | 0 deg              |
| Vol F >> H  | 30 mm              |
| Vol R >> L  | 30 mm              |
| Vol A >> P  | 15 mm              |

**Geometry - AutoAlign**

|                     |                 |
|---------------------|-----------------|
| AutoAlign           | Head > Brain    |
| Initial Position    | L1.2 P49.6 H8.9 |
| L                   | 1.2 mm          |
| P                   | 49.6 mm         |
| H                   | 8.9 mm          |
| Initial Rotation    | 0.00 deg        |
| Initial Orientation | C > T           |
| C > T               | 30.0            |
| > S                 | 0.0             |

**System - Miscellaneous**

|                  |                      |
|------------------|----------------------|
| Positioning mode | FIX                  |
| Table position   | H                    |
| Table position   | 0 mm                 |
| MSMA             | S - C - T            |
| Sagittal         | R >> L               |
| Coronal          | A >> P               |
| Transversal      | F >> H               |
| Save uncombined  | Off                  |
| AutoAlign        | Head > Brain         |
| Coil Select Mode | Off - AutoCoilSelect |

**System - Adjustments**

|                          |          |
|--------------------------|----------|
| B0 Shim mode             | Brain    |
| B1 Shim mode             | TrueForm |
| Adj. water suppr.        | Off      |
| Confirm freq. adjustment | Off      |
| Assume Dominant Fat      | Off      |
| Assume Silicone          | Off      |
| Adjustment Tolerance     | Auto     |

**System - Adjust Volume**

|             |                    |
|-------------|--------------------|
| Position    | L1.2 P49.6 H8.9 mm |
| Orientation | C > T30.0          |
| Rotation    | 0.00 deg           |
| R >> L      | 30 mm              |
| F >> H      | 30 mm              |
| A >> P      | 15 mm              |
| Reset       | Off                |

**System - Tx/Rx**

|                     |                |
|---------------------|----------------|
| Frequency 1H        | 297.207726 MHz |
| Correction factor   | 1              |
| Gain                | High           |
| Img. Scale Cor.     | 1.000          |
| Reset               | Off            |
| ? Ref. amplitude 1H | 0.000 V        |

**Physio - Signal1**

|                 |         |
|-----------------|---------|
| 1st Signal/Mode | None    |
| TR              | 5000 ms |

**Sequence - Common**

|                      |         |
|----------------------|---------|
| Introduction         | On      |
| Preparation scans    | 2       |
| Delta frequency      | 0.0 ppm |
| Phase cycling        | Auto    |
| Bandwidth            | 6000 Hz |
| Acquisition duration | 341 ms  |
| Remove oversampling  | On      |

**Sequence - Nuclei**

|                       |      |
|-----------------------|------|
| TX/RX Nucleus         | 1H   |
| TX/RX delta frequency | 0 Hz |
| TX Nucleus            | None |
| TX delta frequency    | 0 Hz |
| Coil elements         | PFC  |

**Sequence - Special**

|                        |           |
|------------------------|-----------|
| RF pulse duration      | 1280 us   |
| Spoiler max. amplitude | 30.0 mT/m |

**Sequence - Special**

|                      |          |
|----------------------|----------|
| Refocus grad. factor | 1.00     |
| OVS slab thickness   | 100.0 mm |
| OVS slab pos. offset | 5.0 mm   |
| Spoiler duration     | 1500 us  |
| Acq. window shift    | 200 us   |
| Min. settling delay  | 100 us   |
| Gradient ramp time   | 200 us   |
| VAPOR flip angle     | 60 deg   |
| VAPOR delay 8        | 16 ms    |
| VAPOR delay 7        | 66 ms    |
| OVS pulse duration   | 2560 us  |
| OVS flip angle RO    | 90 deg   |
| OVS flip angle PH    | 90 deg   |
| OVS flip angle SL    | 90 deg   |
| VAPOR delay 6        | 71 ms    |
| VAPOR delay 5        | 112 ms   |
| VAPOR delay 4        | 115 ms   |
| VAPOR delay 3        | 132 ms   |
| VAPOR delay 2        | 110 ms   |
| VAPOR delay 1        | 160 ms   |
| Enable OVS           | On       |
| Send ref. scans      | Off      |
| Inversion pulse      | Off      |
| Symmetric RF pulses  | On       |
| Invert SS grad. pol. | Off      |
| Shift RO frequency   | Off      |
| Debug loop type      | None     |

\\USER\PHCP\MRS\final\PFC steam eja cal fa 50 10 7

TA: 0:53 PM: FIX Vol: 30 ×30 ×15 mmRel. SNR: 1.00 : steam

**Properties**

|                                               |                    |
|-----------------------------------------------|--------------------|
| Prio recon                                    | Off                |
| Load images to viewer                         | On                 |
| Inline movie                                  | Off                |
| Auto store images                             | On                 |
| Load images to stamp segments                 | Off                |
| Load images to graphic segments               | Off                |
| Auto open inline display                      | On                 |
| Auto close inline display                     | Off                |
| Start measurement without further preparation | Off                |
| Wait for user to start                        | Off                |
| Start measurements                            | Single measurement |

**Routine**

|               |                    |
|---------------|--------------------|
| Position      | L1.2 P49.6 H8.9 mm |
| Orientation   | C > T30.0          |
| Rotation      | 0 deg              |
| Vol F >> H    | 30 mm              |
| Vol F >> H    | 30 mm              |
| Vol A >> P    | 15 mm              |
| TR            | 5000 ms            |
| TE            | 8.00 ms            |
| Averages      | 1                  |
| Filter        | None               |
| Coil elements | PFC                |

**Contrast**

|                     |              |
|---------------------|--------------|
| TR                  | 5000 ms      |
| TE                  | 8.00 ms      |
| TM                  | 32.00 ms     |
| Averages            | 1            |
| Flip angle          | 50 deg       |
| VAPOR               | Only RF off  |
| VAPOR suppr.        | Water suppr. |
| Water s. BW         | 135 Hz       |
| Water s. delta pos. | 0.00 ppm     |
| Measurements        | 7            |

**Resolution - Common**

|             |      |
|-------------|------|
| Vector size | 2048 |
|-------------|------|

**Geometry - Common**

|             |                    |
|-------------|--------------------|
| Position    | L1.2 P49.6 H8.9 mm |
| Orientation | C > T30.0          |
| Rotation    | 0 deg              |
| Vol F >> H  | 30 mm              |
| Vol R >> L  | 30 mm              |
| Vol A >> P  | 15 mm              |

**Geometry - AutoAlign**

|                     |                 |
|---------------------|-----------------|
| AutoAlign           | Head > Brain    |
| Initial Position    | L1.2 P49.6 H8.9 |
| L                   | 1.2 mm          |
| P                   | 49.6 mm         |
| H                   | 8.9 mm          |
| Initial Rotation    | 0.00 deg        |
| Initial Orientation | C > T           |
| C > T               | 30.0            |
| > S                 | 0.0             |

**System - Miscellaneous**

|                  |                      |
|------------------|----------------------|
| Positioning mode | FIX                  |
| Table position   | H                    |
| Table position   | 0 mm                 |
| MSMA             | S - C - T            |
| Sagittal         | R >> L               |
| Coronal          | A >> P               |
| Transversal      | F >> H               |
| Save uncombined  | Off                  |
| AutoAlign        | Head > Brain         |
| Coil Select Mode | Off - AutoCoilSelect |

**System - Adjustments**

|                          |          |
|--------------------------|----------|
| B0 Shim mode             | Brain    |
| B1 Shim mode             | TrueForm |
| Adj. water suppr.        | Off      |
| Confirm freq. adjustment | Off      |
| Assume Dominant Fat      | Off      |
| Assume Silicone          | Off      |
| Adjustment Tolerance     | Auto     |

**System - Adjust Volume**

|             |                    |
|-------------|--------------------|
| Position    | L1.2 P49.6 H8.9 mm |
| Orientation | C > T30.0          |
| Rotation    | 0.00 deg           |
| R >> L      | 30 mm              |
| F >> H      | 30 mm              |
| A >> P      | 15 mm              |
| Reset       | Off                |

**System - Tx/Rx**

|                     |                |
|---------------------|----------------|
| Frequency 1H        | 297.207726 MHz |
| Correction factor   | 1              |
| Gain                | High           |
| Img. Scale Cor.     | 1.000          |
| Reset               | Off            |
| ? Ref. amplitude 1H | 0.000 V        |

**Physio - Signal1**

|                 |         |
|-----------------|---------|
| 1st Signal/Mode | None    |
| TR              | 5000 ms |

**Sequence - Common**

|                      |         |
|----------------------|---------|
| Introduction         | On      |
| Preparation scans    | 2       |
| Delta frequency      | 0.0 ppm |
| Phase cycling        | Auto    |
| Bandwidth            | 6000 Hz |
| Acquisition duration | 341 ms  |
| Remove oversampling  | On      |

**Sequence - Nuclei**

|                       |      |
|-----------------------|------|
| TX/RX Nucleus         | 1H   |
| TX/RX delta frequency | 0 Hz |
| TX Nucleus            | None |
| TX delta frequency    | 0 Hz |
| Coil elements         | PFC  |

**Sequence - Special**

|                        |           |
|------------------------|-----------|
| RF pulse duration      | 1520 us   |
| Spoiler max. amplitude | 30.0 mT/m |

**Sequence - Special**

|                      |            |
|----------------------|------------|
| Refocus grad. factor | 1.00       |
| OVS slab thickness   | 100.0 mm   |
| OVS slab pos. offset | 5.0 mm     |
| Spoiler duration     | 1500 us    |
| Acq. window shift    | 200 us     |
| Min. settling delay  | 100 us     |
| Gradient ramp time   | 200 us     |
| VAPOR flip angle     | 60 deg     |
| VAPOR delay 8        | 16 ms      |
| VAPOR delay 7        | 66 ms      |
| OVS pulse duration   | 2560 us    |
| OVS flip angle RO    | 90 deg     |
| OVS flip angle PH    | 90 deg     |
| OVS flip angle SL    | 90 deg     |
| VAPOR delay 6        | 71 ms      |
| VAPOR delay 5        | 112 ms     |
| VAPOR delay 4        | 115 ms     |
| VAPOR delay 3        | 132 ms     |
| VAPOR delay 2        | 110 ms     |
| VAPOR delay 1        | 160 ms     |
| Enable OVS           | On         |
| Weighted averages    | Off        |
| Send ref. scans      | Off        |
| Inversion pulse      | Off        |
| Symmetric RF pulses  | On         |
| Invert SS grad. pol. | Off        |
| Shift RO frequency   | Off        |
| Debug loop type      | Flip angle |
| Flip angle inc.      | 10 deg     |
| Measurements         | 7          |

\\USER\PHCP\MRS\final\PFC steam eja cal fa 80 3 10

TA: 1:08 PM: FIX Vol: 30 ×30 ×15 mmRel. SNR: 1.00 : steam

**Properties**

|                                               |                    |
|-----------------------------------------------|--------------------|
| Prio recon                                    | Off                |
| Load images to viewer                         | On                 |
| Inline movie                                  | Off                |
| Auto store images                             | On                 |
| Load images to stamp segments                 | Off                |
| Load images to graphic segments               | Off                |
| Auto open inline display                      | Off                |
| Auto close inline display                     | Off                |
| Start measurement without further preparation | Off                |
| Wait for user to start                        | Off                |
| Start measurements                            | Single measurement |

**Routine**

|               |                    |
|---------------|--------------------|
| Position      | L1.2 P49.6 H8.9 mm |
| Orientation   | C > T30.0          |
| Rotation      | 0 deg              |
| Vol F >> H    | 30 mm              |
| Vol F >> H    | 30 mm              |
| Vol A >> P    | 15 mm              |
| TR            | 5000 ms            |
| TE            | 8.00 ms            |
| Averages      | 1                  |
| Filter        | None               |
| Coil elements | PFC                |

**Contrast**

|                     |              |
|---------------------|--------------|
| TR                  | 5000 ms      |
| TE                  | 8.00 ms      |
| TM                  | 32.00 ms     |
| Averages            | 1            |
| Flip angle          | 80 deg       |
| VAPOR               | Only RF off  |
| VAPOR suppr.        | Water suppr. |
| Water s. BW         | 135 Hz       |
| Water s. delta pos. | 0.00 ppm     |
| Measurements        | 10           |

**Resolution - Common**

|             |      |
|-------------|------|
| Vector size | 2048 |
|-------------|------|

**Geometry - Common**

|             |                    |
|-------------|--------------------|
| Position    | L1.2 P49.6 H8.9 mm |
| Orientation | C > T30.0          |
| Rotation    | 0 deg              |
| Vol F >> H  | 30 mm              |
| Vol R >> L  | 30 mm              |
| Vol A >> P  | 15 mm              |

**Geometry - AutoAlign**

|                     |                 |
|---------------------|-----------------|
| AutoAlign           | Head > Brain    |
| Initial Position    | L1.2 P49.6 H8.9 |
| L                   | 1.2 mm          |
| P                   | 49.6 mm         |
| H                   | 8.9 mm          |
| Initial Rotation    | 0.00 deg        |
| Initial Orientation | C > T           |
| C > T               | 30.0            |
| > S                 | 0.0             |

**System - Miscellaneous**

|                  |                      |
|------------------|----------------------|
| Positioning mode | FIX                  |
| Table position   | H                    |
| Table position   | 0 mm                 |
| MSMA             | S - C - T            |
| Sagittal         | R >> L               |
| Coronal          | A >> P               |
| Transversal      | F >> H               |
| Save uncombined  | Off                  |
| AutoAlign        | Head > Brain         |
| Coil Select Mode | Off - AutoCoilSelect |

**System - Adjustments**

|                          |          |
|--------------------------|----------|
| B0 Shim mode             | Brain    |
| B1 Shim mode             | TrueForm |
| Adj. water suppr.        | Off      |
| Confirm freq. adjustment | Off      |
| Assume Dominant Fat      | Off      |
| Assume Silicone          | Off      |
| Adjustment Tolerance     | Auto     |

**System - Adjust Volume**

|             |                    |
|-------------|--------------------|
| Position    | L1.2 P49.6 H8.9 mm |
| Orientation | C > T30.0          |
| Rotation    | 0.00 deg           |
| R >> L      | 30 mm              |
| F >> H      | 30 mm              |
| A >> P      | 15 mm              |
| Reset       | Off                |

**System - Tx/Rx**

|                     |                |
|---------------------|----------------|
| Frequency 1H        | 297.207726 MHz |
| Correction factor   | 1              |
| Gain                | High           |
| Img. Scale Cor.     | 1.000          |
| Reset               | Off            |
| ? Ref. amplitude 1H | 0.000 V        |

**Physio - Signal1**

|                 |         |
|-----------------|---------|
| 1st Signal/Mode | None    |
| TR              | 5000 ms |

**Sequence - Common**

|                      |         |
|----------------------|---------|
| Introduction         | On      |
| Preparation scans    | 2       |
| Delta frequency      | 0.0 ppm |
| Phase cycling        | Auto    |
| Bandwidth            | 6000 Hz |
| Acquisition duration | 341 ms  |
| Remove oversampling  | On      |

**Sequence - Nuclei**

|                       |      |
|-----------------------|------|
| TX/RX Nucleus         | 1H   |
| TX/RX delta frequency | 0 Hz |
| TX Nucleus            | None |
| TX delta frequency    | 0 Hz |
| Coil elements         | PFC  |

**Sequence - Special**

|                        |           |
|------------------------|-----------|
| RF pulse duration      | 1520 us   |
| Spoiler max. amplitude | 30.0 mT/m |



**Sequence - Special**

|                      |            |
|----------------------|------------|
| Refocus grad. factor | 1.00       |
| OVS slab thickness   | 100.0 mm   |
| OVS slab pos. offset | 5.0 mm     |
| Spoiler duration     | 1500 us    |
| Acq. window shift    | 200 us     |
| Min. settling delay  | 100 us     |
| Gradient ramp time   | 200 us     |
| VAPOR flip angle     | 60 deg     |
| VAPOR delay 8        | 16 ms      |
| VAPOR delay 7        | 66 ms      |
| OVS pulse duration   | 2560 us    |
| OVS flip angle RO    | 90 deg     |
| OVS flip angle PH    | 90 deg     |
| OVS flip angle SL    | 90 deg     |
| VAPOR delay 6        | 71 ms      |
| VAPOR delay 5        | 112 ms     |
| VAPOR delay 4        | 115 ms     |
| VAPOR delay 3        | 132 ms     |
| VAPOR delay 2        | 110 ms     |
| VAPOR delay 1        | 160 ms     |
| Enable OVS           | On         |
| Weighted averages    | Off        |
| Send ref. scans      | Off        |
| Inversion pulse      | Off        |
| Symmetric RF pulses  | On         |
| Invert SS grad. pol. | Off        |
| Shift RO frequency   | Off        |
| Debug loop type      | Flip angle |
| Flip angle inc.      | 3 deg      |
| Measurements         | 10         |

\\USER\PHCP\MRS\final\PFC steam eja ws check

TA: 0:38 PM: FIX Vol: 30 ×30 ×15 mmRel. SNR: 1.00 : steam

**Properties**

|                                               |                    |
|-----------------------------------------------|--------------------|
| Prio recon                                    | Off                |
| Load images to viewer                         | On                 |
| Inline movie                                  | Off                |
| Auto store images                             | On                 |
| Load images to stamp segments                 | Off                |
| Load images to graphic segments               | Off                |
| Auto open inline display                      | Off                |
| Auto close inline display                     | Off                |
| Start measurement without further preparation | Off                |
| Wait for user to start                        | Off                |
| Start measurements                            | Single measurement |

**Routine**

|               |                    |
|---------------|--------------------|
| Position      | L1.2 P49.6 H8.9 mm |
| Orientation   | C > T30.0          |
| Rotation      | 0 deg              |
| Vol F >> H    | 30 mm              |
| Vol F >> H    | 30 mm              |
| Vol A >> P    | 15 mm              |
| TR            | 5000 ms            |
| TE            | 8.00 ms            |
| Averages      | 4                  |
| Filter        | None               |
| Coil elements | PFC                |

**Contrast**

|                     |              |
|---------------------|--------------|
| TR                  | 5000 ms      |
| TE                  | 8.00 ms      |
| TM                  | 32.00 ms     |
| Averages            | 4            |
| Flip angle          | 90 deg       |
| VAPOR               | Enabled      |
| VAPOR suppr.        | Water suppr. |
| Water s. BW         | 135 Hz       |
| Water s. delta pos. | 0.00 ppm     |
| Measurements        | 1            |

**Resolution - Common**

|             |      |
|-------------|------|
| Vector size | 2048 |
|-------------|------|

**Geometry - Common**

|             |                    |
|-------------|--------------------|
| Position    | L1.2 P49.6 H8.9 mm |
| Orientation | C > T30.0          |
| Rotation    | 0 deg              |
| Vol F >> H  | 30 mm              |
| Vol R >> L  | 30 mm              |
| Vol A >> P  | 15 mm              |

**Geometry - AutoAlign**

|                     |                 |
|---------------------|-----------------|
| AutoAlign           | Head > Brain    |
| Initial Position    | L1.2 P49.6 H8.9 |
| L                   | 1.2 mm          |
| P                   | 49.6 mm         |
| H                   | 8.9 mm          |
| Initial Rotation    | 0.00 deg        |
| Initial Orientation | C > T           |
| C > T               | 30.0            |
| > S                 | 0.0             |

**System - Miscellaneous**

|                  |                      |
|------------------|----------------------|
| Positioning mode | FIX                  |
| Table position   | H                    |
| Table position   | 0 mm                 |
| MSMA             | S - C - T            |
| Sagittal         | R >> L               |
| Coronal          | A >> P               |
| Transversal      | F >> H               |
| Save uncombined  | Off                  |
| AutoAlign        | Head > Brain         |
| Coil Select Mode | Off - AutoCoilSelect |

**System - Adjustments**

|                          |          |
|--------------------------|----------|
| B0 Shim mode             | Brain    |
| B1 Shim mode             | TrueForm |
| Adj. water suppr.        | Off      |
| Confirm freq. adjustment | Off      |
| Assume Dominant Fat      | Off      |
| Assume Silicone          | Off      |
| Adjustment Tolerance     | Auto     |

**System - Adjust Volume**

|             |                    |
|-------------|--------------------|
| Position    | L1.2 P49.6 H8.9 mm |
| Orientation | C > T30.0          |
| Rotation    | 0.00 deg           |
| R >> L      | 30 mm              |
| F >> H      | 30 mm              |
| A >> P      | 15 mm              |
| Reset       | Off                |

**System - Tx/Rx**

|                     |                |
|---------------------|----------------|
| Frequency 1H        | 297.207726 MHz |
| Correction factor   | 1              |
| Gain                | High           |
| Img. Scale Cor.     | 1.000          |
| Reset               | Off            |
| ? Ref. amplitude 1H | 0.000 V        |

**Physio - Signal1**

|                 |         |
|-----------------|---------|
| 1st Signal/Mode | None    |
| TR              | 5000 ms |

**Sequence - Common**

|                      |          |
|----------------------|----------|
| Introduction         | On       |
| Preparation scans    | 2        |
| Delta frequency      | -1.7 ppm |
| Phase cycling        | Auto     |
| Bandwidth            | 6000 Hz  |
| Acquisition duration | 341 ms   |
| Remove oversampling  | On       |

**Sequence - Nuclei**

|                       |      |
|-----------------------|------|
| TX/RX Nucleus         | 1H   |
| TX/RX delta frequency | 0 Hz |
| TX Nucleus            | None |
| TX delta frequency    | 0 Hz |
| Coil elements         | PFC  |

**Sequence - Special**

|                        |           |
|------------------------|-----------|
| RF pulse duration      | 1280 us   |
| Spoiler max. amplitude | 30.0 mT/m |

**Sequence - Special**

|                      |          |
|----------------------|----------|
| Refocus grad. factor | 1.00     |
| OVS slab thickness   | 100.0 mm |
| OVS slab pos. offset | 5.0 mm   |
| Spoiler duration     | 1500 us  |
| Acq. window shift    | 200 us   |
| Min. settling delay  | 100 us   |
| Gradient ramp time   | 200 us   |
| VAPOR flip angle     | 72 deg   |
| VAPOR delay 8        | 16 ms    |
| VAPOR delay 7        | 66 ms    |
| OVS pulse duration   | 2560 us  |
| OVS flip angle RO    | 90 deg   |
| OVS flip angle PH    | 90 deg   |
| OVS flip angle SL    | 90 deg   |
| VAPOR delay 6        | 71 ms    |
| VAPOR delay 5        | 112 ms   |
| VAPOR delay 4        | 115 ms   |
| VAPOR delay 3        | 132 ms   |
| VAPOR delay 2        | 110 ms   |
| VAPOR delay 1        | 160 ms   |
| Enable OVS           | On       |
| Resolve averages     | On       |
| Send ref. scans      | Off      |
| Inversion pulse      | Off      |
| Symmetric RF pulses  | On       |
| Invert SS grad. pol. | Off      |
| Shift RO frequency   | Off      |
| Debug loop type      | None     |

\\USER\PHCP\MRS\final\PFC steam eja metab

TA: 8:33 PM: FIX Vol: 30 ×30 ×15 mmRel. SNR: 1.00 : steam

**Properties**

|                                               |                    |
|-----------------------------------------------|--------------------|
| Prio recon                                    | Off                |
| Load images to viewer                         | On                 |
| Inline movie                                  | Off                |
| Auto store images                             | On                 |
| Load images to stamp segments                 | Off                |
| Load images to graphic segments               | Off                |
| Auto open inline display                      | Off                |
| Auto close inline display                     | Off                |
| Start measurement without further preparation | Off                |
| Wait for user to start                        | Off                |
| Start measurements                            | Single measurement |

**Routine**

|               |                    |
|---------------|--------------------|
| Position      | L1.2 P49.6 H8.9 mm |
| Orientation   | C > T30.0          |
| Rotation      | 0 deg              |
| Vol F >> H    | 30 mm              |
| Vol F >> H    | 30 mm              |
| Vol A >> P    | 15 mm              |
| TR            | 5000 ms            |
| TE            | 8.00 ms            |
| Averages      | 96                 |
| Filter        | None               |
| Coil elements | PFC                |

**Contrast**

|                     |              |
|---------------------|--------------|
| TR                  | 5000 ms      |
| TE                  | 8.00 ms      |
| TM                  | 32.00 ms     |
| Averages            | 96           |
| Flip angle          | 90 deg       |
| VAPOR               | Enabled      |
| VAPOR suppr.        | Water suppr. |
| Water s. BW         | 135 Hz       |
| Water s. delta pos. | 0.00 ppm     |
| Measurements        | 1            |

**Resolution - Common**

|             |      |
|-------------|------|
| Vector size | 2048 |
|-------------|------|

**Geometry - Common**

|             |                    |
|-------------|--------------------|
| Position    | L1.2 P49.6 H8.9 mm |
| Orientation | C > T30.0          |
| Rotation    | 0 deg              |
| Vol F >> H  | 30 mm              |
| Vol R >> L  | 30 mm              |
| Vol A >> P  | 15 mm              |

**Geometry - AutoAlign**

|                     |                 |
|---------------------|-----------------|
| AutoAlign           | Head > Brain    |
| Initial Position    | L1.2 P49.6 H8.9 |
| L                   | 1.2 mm          |
| P                   | 49.6 mm         |
| H                   | 8.9 mm          |
| Initial Rotation    | 0.00 deg        |
| Initial Orientation | C > T           |
| C > T               | 30.0            |
| > S                 | 0.0             |

**System - Miscellaneous**

|                  |                      |
|------------------|----------------------|
| Positioning mode | FIX                  |
| Table position   | H                    |
| Table position   | 0 mm                 |
| MSMA             | S - C - T            |
| Sagittal         | R >> L               |
| Coronal          | A >> P               |
| Transversal      | F >> H               |
| Save uncombined  | Off                  |
| AutoAlign        | Head > Brain         |
| Coil Select Mode | Off - AutoCoilSelect |

**System - Adjustments**

|                          |          |
|--------------------------|----------|
| B0 Shim mode             | Brain    |
| B1 Shim mode             | TrueForm |
| Adj. water suppr.        | Off      |
| Confirm freq. adjustment | Off      |
| Assume Dominant Fat      | Off      |
| Assume Silicone          | Off      |
| Adjustment Tolerance     | Auto     |

**System - Adjust Volume**

|             |                    |
|-------------|--------------------|
| Position    | L1.2 P49.6 H8.9 mm |
| Orientation | C > T30.0          |
| Rotation    | 0.00 deg           |
| R >> L      | 30 mm              |
| F >> H      | 30 mm              |
| A >> P      | 15 mm              |
| Reset       | Off                |

**System - Tx/Rx**

|                     |                |
|---------------------|----------------|
| Frequency 1H        | 297.207726 MHz |
| Correction factor   | 1              |
| Gain                | High           |
| Img. Scale Cor.     | 1.000          |
| Reset               | Off            |
| ? Ref. amplitude 1H | 0.000 V        |

**Physio - Signal1**

|                 |         |
|-----------------|---------|
| 1st Signal/Mode | None    |
| TR              | 5000 ms |

**Sequence - Common**

|                      |          |
|----------------------|----------|
| Introduction         | On       |
| Preparation scans    | 2        |
| Delta frequency      | -1.7 ppm |
| Phase cycling        | Auto     |
| Bandwidth            | 6000 Hz  |
| Acquisition duration | 341 ms   |
| Remove oversampling  | On       |

**Sequence - Nuclei**

|                       |      |
|-----------------------|------|
| TX/RX Nucleus         | 1H   |
| TX/RX delta frequency | 0 Hz |
| TX Nucleus            | None |
| TX delta frequency    | 0 Hz |
| Coil elements         | PFC  |

**Sequence - Special**

|                        |           |
|------------------------|-----------|
| RF pulse duration      | 1280 us   |
| Spoiler max. amplitude | 30.0 mT/m |

**Sequence - Special**

|                      |          |
|----------------------|----------|
| Refocus grad. factor | 1.00     |
| OVS slab thickness   | 100.0 mm |
| OVS slab pos. offset | 5.0 mm   |
| Spoiler duration     | 1500 us  |
| Acq. window shift    | 200 us   |
| Min. settling delay  | 100 us   |
| Gradient ramp time   | 200 us   |
| VAPOR flip angle     | 72 deg   |
| VAPOR delay 8        | 16 ms    |
| VAPOR delay 7        | 66 ms    |
| OVS pulse duration   | 2560 us  |
| OVS flip angle RO    | 90 deg   |
| OVS flip angle PH    | 90 deg   |
| OVS flip angle SL    | 90 deg   |
| VAPOR delay 6        | 71 ms    |
| VAPOR delay 5        | 112 ms   |
| VAPOR delay 4        | 115 ms   |
| VAPOR delay 3        | 132 ms   |
| VAPOR delay 2        | 110 ms   |
| VAPOR delay 1        | 160 ms   |
| Enable OVS           | On       |
| Resolve averages     | On       |
| Send ref. scans      | Off      |
| Inversion pulse      | Off      |
| Symmetric RF pulses  | On       |
| Invert SS grad. pol. | Off      |
| Shift RO frequency   | Off      |
| Debug loop type      | None     |

\\USER\PHCP\MRS\final\PFC steam eja w1

TA: 0:23 PM: FIX Vol: 30 ×30 ×15 mmRel. SNR: 1.00 : steam

**Properties**

|                                               |                    |
|-----------------------------------------------|--------------------|
| Prio recon                                    | Off                |
| Load images to viewer                         | On                 |
| Inline movie                                  | Off                |
| Auto store images                             | On                 |
| Load images to stamp segments                 | Off                |
| Load images to graphic segments               | Off                |
| Auto open inline display                      | Off                |
| Auto close inline display                     | Off                |
| Start measurement without further preparation | Off                |
| Wait for user to start                        | Off                |
| Start measurements                            | Single measurement |

**Routine**

|               |                    |
|---------------|--------------------|
| Position      | L1.2 P49.6 H8.9 mm |
| Orientation   | C > T30.0          |
| Rotation      | 0 deg              |
| Vol F >> H    | 30 mm              |
| Vol F >> H    | 30 mm              |
| Vol A >> P    | 15 mm              |
| TR            | 5000 ms            |
| TE            | 8.00 ms            |
| Averages      | 1                  |
| Filter        | None               |
| Coil elements | PFC                |

**Contrast**

|                     |              |
|---------------------|--------------|
| TR                  | 5000 ms      |
| TE                  | 8.00 ms      |
| TM                  | 32.00 ms     |
| Averages            | 1            |
| Flip angle          | 90 deg       |
| VAPOR               | Only RF off  |
| VAPOR suppr.        | Water suppr. |
| Water s. BW         | 135 Hz       |
| Water s. delta pos. | 0.00 ppm     |
| Measurements        | 1            |

**Resolution - Common**

|             |      |
|-------------|------|
| Vector size | 2048 |
|-------------|------|

**Geometry - Common**

|             |                    |
|-------------|--------------------|
| Position    | L1.2 P49.6 H8.9 mm |
| Orientation | C > T30.0          |
| Rotation    | 0 deg              |
| Vol F >> H  | 30 mm              |
| Vol R >> L  | 30 mm              |
| Vol A >> P  | 15 mm              |

**Geometry - AutoAlign**

|                     |                 |
|---------------------|-----------------|
| AutoAlign           | Head > Brain    |
| Initial Position    | L1.2 P49.6 H8.9 |
| L                   | 1.2 mm          |
| P                   | 49.6 mm         |
| H                   | 8.9 mm          |
| Initial Rotation    | 0.00 deg        |
| Initial Orientation | C > T           |
| C > T               | 30.0            |
| > S                 | 0.0             |

**System - Miscellaneous**

|                  |                      |
|------------------|----------------------|
| Positioning mode | FIX                  |
| Table position   | H                    |
| Table position   | 0 mm                 |
| MSMA             | S - C - T            |
| Sagittal         | R >> L               |
| Coronal          | A >> P               |
| Transversal      | F >> H               |
| Save uncombined  | Off                  |
| AutoAlign        | Head > Brain         |
| Coil Select Mode | Off - AutoCoilSelect |

**System - Adjustments**

|                          |          |
|--------------------------|----------|
| B0 Shim mode             | Brain    |
| B1 Shim mode             | TrueForm |
| Adj. water suppr.        | Off      |
| Confirm freq. adjustment | Off      |
| Assume Dominant Fat      | Off      |
| Assume Silicone          | Off      |
| Adjustment Tolerance     | Auto     |

**System - Adjust Volume**

|             |                    |
|-------------|--------------------|
| Position    | L1.2 P49.6 H8.9 mm |
| Orientation | C > T30.0          |
| Rotation    | 0.00 deg           |
| R >> L      | 30 mm              |
| F >> H      | 30 mm              |
| A >> P      | 15 mm              |
| Reset       | Off                |

**System - Tx/Rx**

|                     |                |
|---------------------|----------------|
| Frequency 1H        | 297.207726 MHz |
| Correction factor   | 1              |
| Gain                | High           |
| Img. Scale Cor.     | 1.000          |
| Reset               | Off            |
| ? Ref. amplitude 1H | 0.000 V        |

**Physio - Signal1**

|                 |         |
|-----------------|---------|
| 1st Signal/Mode | None    |
| TR              | 5000 ms |

**Sequence - Common**

|                      |         |
|----------------------|---------|
| Introduction         | On      |
| Preparation scans    | 2       |
| Delta frequency      | 0.0 ppm |
| Phase cycling        | Auto    |
| Bandwidth            | 6000 Hz |
| Acquisition duration | 341 ms  |
| Remove oversampling  | On      |

**Sequence - Nuclei**

|                       |      |
|-----------------------|------|
| TX/RX Nucleus         | 1H   |
| TX/RX delta frequency | 0 Hz |
| TX Nucleus            | None |
| TX delta frequency    | 0 Hz |
| Coil elements         | PFC  |

**Sequence - Special**

|                        |           |
|------------------------|-----------|
| RF pulse duration      | 1280 us   |
| Spoiler max. amplitude | 30.0 mT/m |

**Sequence - Special**

|                      |          |
|----------------------|----------|
| Refocus grad. factor | 1.00     |
| OVS slab thickness   | 100.0 mm |
| OVS slab pos. offset | 5.0 mm   |
| Spoiler duration     | 1500 us  |
| Acq. window shift    | 200 us   |
| Min. settling delay  | 100 us   |
| Gradient ramp time   | 200 us   |
| VAPOR flip angle     | 60 deg   |
| VAPOR delay 8        | 16 ms    |
| VAPOR delay 7        | 66 ms    |
| OVS pulse duration   | 2560 us  |
| OVS flip angle RO    | 90 deg   |
| OVS flip angle PH    | 90 deg   |
| OVS flip angle SL    | 90 deg   |
| VAPOR delay 6        | 71 ms    |
| VAPOR delay 5        | 112 ms   |
| VAPOR delay 4        | 115 ms   |
| VAPOR delay 3        | 132 ms   |
| VAPOR delay 2        | 110 ms   |
| VAPOR delay 1        | 160 ms   |
| Enable OVS           | On       |
| Send ref. scans      | Off      |
| Inversion pulse      | Off      |
| Symmetric RF pulses  | On       |
| Invert SS grad. pol. | Off      |
| Shift RO frequency   | Off      |
| Debug loop type      | None     |

\\USER\PHCP\MRS\final\PFC steam eja w4

TA: 0:38 PM: FIX Vol: 30 ×30 ×15 mmRel. SNR: 1.00 : steam

**Properties**

|                                               |                    |
|-----------------------------------------------|--------------------|
| Prio recon                                    | Off                |
| Load images to viewer                         | On                 |
| Inline movie                                  | Off                |
| Auto store images                             | On                 |
| Load images to stamp segments                 | Off                |
| Load images to graphic segments               | Off                |
| Auto open inline display                      | Off                |
| Auto close inline display                     | Off                |
| Start measurement without further preparation | Off                |
| Wait for user to start                        | Off                |
| Start measurements                            | Single measurement |

**Routine**

|               |                    |
|---------------|--------------------|
| Position      | L1.2 P49.6 H8.9 mm |
| Orientation   | C > T30.0          |
| Rotation      | 0 deg              |
| Vol F >> H    | 30 mm              |
| Vol F >> H    | 30 mm              |
| Vol A >> P    | 15 mm              |
| TR            | 5000 ms            |
| TE            | 8.00 ms            |
| Averages      | 4                  |
| Filter        | None               |
| Coil elements | PFC                |

**Contrast**

|                     |              |
|---------------------|--------------|
| TR                  | 5000 ms      |
| TE                  | 8.00 ms      |
| TM                  | 32.00 ms     |
| Averages            | 4            |
| Flip angle          | 90 deg       |
| VAPOR               | Only RF off  |
| VAPOR suppr.        | Water suppr. |
| Water s. BW         | 135 Hz       |
| Water s. delta pos. | 0.00 ppm     |
| Measurements        | 1            |

**Resolution - Common**

|             |      |
|-------------|------|
| Vector size | 2048 |
|-------------|------|

**Geometry - Common**

|             |                    |
|-------------|--------------------|
| Position    | L1.2 P49.6 H8.9 mm |
| Orientation | C > T30.0          |
| Rotation    | 0 deg              |
| Vol F >> H  | 30 mm              |
| Vol R >> L  | 30 mm              |
| Vol A >> P  | 15 mm              |

**Geometry - AutoAlign**

|                     |                 |
|---------------------|-----------------|
| AutoAlign           | Head > Brain    |
| Initial Position    | L1.2 P49.6 H8.9 |
| L                   | 1.2 mm          |
| P                   | 49.6 mm         |
| H                   | 8.9 mm          |
| Initial Rotation    | 0.00 deg        |
| Initial Orientation | C > T           |
| C > T               | 30.0            |
| > S                 | 0.0             |

**System - Miscellaneous**

|                  |                      |
|------------------|----------------------|
| Positioning mode | FIX                  |
| Table position   | H                    |
| Table position   | 0 mm                 |
| MSMA             | S - C - T            |
| Sagittal         | R >> L               |
| Coronal          | A >> P               |
| Transversal      | F >> H               |
| Save uncombined  | Off                  |
| AutoAlign        | Head > Brain         |
| Coil Select Mode | Off - AutoCoilSelect |

**System - Adjustments**

|                          |          |
|--------------------------|----------|
| B0 Shim mode             | Brain    |
| B1 Shim mode             | TrueForm |
| Adj. water suppr.        | Off      |
| Confirm freq. adjustment | Off      |
| Assume Dominant Fat      | Off      |
| Assume Silicone          | Off      |
| Adjustment Tolerance     | Auto     |

**System - Adjust Volume**

|             |                    |
|-------------|--------------------|
| Position    | L1.2 P49.6 H8.9 mm |
| Orientation | C > T30.0          |
| Rotation    | 0.00 deg           |
| R >> L      | 30 mm              |
| F >> H      | 30 mm              |
| A >> P      | 15 mm              |
| Reset       | Off                |

**System - Tx/Rx**

|                     |                |
|---------------------|----------------|
| Frequency 1H        | 297.207726 MHz |
| Correction factor   | 1              |
| Gain                | High           |
| Img. Scale Cor.     | 1.000          |
| Reset               | Off            |
| ? Ref. amplitude 1H | 0.000 V        |

**Physio - Signal1**

|                 |         |
|-----------------|---------|
| 1st Signal/Mode | None    |
| TR              | 5000 ms |

**Sequence - Common**

|                      |         |
|----------------------|---------|
| Introduction         | On      |
| Preparation scans    | 2       |
| Delta frequency      | 0.0 ppm |
| Phase cycling        | Auto    |
| Bandwidth            | 6000 Hz |
| Acquisition duration | 341 ms  |
| Remove oversampling  | On      |

**Sequence - Nuclei**

|                       |      |
|-----------------------|------|
| TX/RX Nucleus         | 1H   |
| TX/RX delta frequency | 0 Hz |
| TX Nucleus            | None |
| TX delta frequency    | 0 Hz |
| Coil elements         | PFC  |

**Sequence - Special**

|                        |           |
|------------------------|-----------|
| RF pulse duration      | 1280 us   |
| Spoiler max. amplitude | 30.0 mT/m |



**Sequence - Special**

|                      |          |
|----------------------|----------|
| Refocus grad. factor | 1.00     |
| OVS slab thickness   | 100.0 mm |
| OVS slab pos. offset | 5.0 mm   |
| Spoiler duration     | 1500 us  |
| Acq. window shift    | 200 us   |
| Min. settling delay  | 100 us   |
| Gradient ramp time   | 200 us   |
| VAPOR flip angle     | 60 deg   |
| VAPOR delay 8        | 16 ms    |
| VAPOR delay 7        | 66 ms    |
| OVS pulse duration   | 2560 us  |
| OVS flip angle RO    | 90 deg   |
| OVS flip angle PH    | 90 deg   |
| OVS flip angle SL    | 90 deg   |
| VAPOR delay 6        | 71 ms    |
| VAPOR delay 5        | 112 ms   |
| VAPOR delay 4        | 115 ms   |
| VAPOR delay 3        | 132 ms   |
| VAPOR delay 2        | 110 ms   |
| VAPOR delay 1        | 160 ms   |
| Enable OVS           | On       |
| Resolve averages     | On       |
| Send ref. scans      | Off      |
| Inversion pulse      | Off      |
| Symmetric RF pulses  | On       |
| Invert SS grad. pol. | Off      |
| Shift RO frequency   | Off      |
| Debug loop type      | None     |

\\USER\PHCP\MRS\final\PFC steam eja w1 noOVS

TA: 0:23 PM: FIX Vol: 30 ×30 ×15 mmRel. SNR: 1.00 : steam

**Properties**

|                                               |                    |
|-----------------------------------------------|--------------------|
| Prio recon                                    | Off                |
| Load images to viewer                         | On                 |
| Inline movie                                  | Off                |
| Auto store images                             | On                 |
| Load images to stamp segments                 | Off                |
| Load images to graphic segments               | Off                |
| Auto open inline display                      | Off                |
| Auto close inline display                     | Off                |
| Start measurement without further preparation | Off                |
| Wait for user to start                        | Off                |
| Start measurements                            | Single measurement |

**Routine**

|               |                    |
|---------------|--------------------|
| Position      | L1.2 P49.6 H8.9 mm |
| Orientation   | C > T30.0          |
| Rotation      | 0 deg              |
| Vol F >> H    | 30 mm              |
| Vol F >> H    | 30 mm              |
| Vol A >> P    | 15 mm              |
| TR            | 5000 ms            |
| TE            | 8.00 ms            |
| Averages      | 1                  |
| Filter        | None               |
| Coil elements | PFC                |

**Contrast**

|                     |              |
|---------------------|--------------|
| TR                  | 5000 ms      |
| TE                  | 8.00 ms      |
| TM                  | 32.00 ms     |
| Averages            | 1            |
| Flip angle          | 90 deg       |
| VAPOR               | Only RF off  |
| VAPOR suppr.        | Water suppr. |
| Water s. BW         | 135 Hz       |
| Water s. delta pos. | 0.00 ppm     |
| Measurements        | 1            |

**Resolution - Common**

|             |      |
|-------------|------|
| Vector size | 2048 |
|-------------|------|

**Geometry - Common**

|             |                    |
|-------------|--------------------|
| Position    | L1.2 P49.6 H8.9 mm |
| Orientation | C > T30.0          |
| Rotation    | 0 deg              |
| Vol F >> H  | 30 mm              |
| Vol R >> L  | 30 mm              |
| Vol A >> P  | 15 mm              |

**Geometry - AutoAlign**

|                     |                 |
|---------------------|-----------------|
| AutoAlign           | Head > Brain    |
| Initial Position    | L1.2 P49.6 H8.9 |
| L                   | 1.2 mm          |
| P                   | 49.6 mm         |
| H                   | 8.9 mm          |
| Initial Rotation    | 0.00 deg        |
| Initial Orientation | C > T           |
| C > T               | 30.0            |
| > S                 | 0.0             |

**System - Miscellaneous**

|                  |                      |
|------------------|----------------------|
| Positioning mode | FIX                  |
| Table position   | H                    |
| Table position   | 0 mm                 |
| MSMA             | S - C - T            |
| Sagittal         | R >> L               |
| Coronal          | A >> P               |
| Transversal      | F >> H               |
| Save uncombined  | Off                  |
| AutoAlign        | Head > Brain         |
| Coil Select Mode | Off - AutoCoilSelect |

**System - Adjustments**

|                          |          |
|--------------------------|----------|
| B0 Shim mode             | Brain    |
| B1 Shim mode             | TrueForm |
| Adj. water suppr.        | Off      |
| Confirm freq. adjustment | Off      |
| Assume Dominant Fat      | Off      |
| Assume Silicone          | Off      |
| Adjustment Tolerance     | Auto     |

**System - Adjust Volume**

|             |                    |
|-------------|--------------------|
| Position    | L1.2 P49.6 H8.9 mm |
| Orientation | C > T30.0          |
| Rotation    | 0.00 deg           |
| R >> L      | 30 mm              |
| F >> H      | 30 mm              |
| A >> P      | 15 mm              |
| Reset       | Off                |

**System - Tx/Rx**

|                     |                |
|---------------------|----------------|
| Frequency 1H        | 297.207726 MHz |
| Correction factor   | 1              |
| Gain                | High           |
| Img. Scale Cor.     | 1.000          |
| Reset               | Off            |
| ? Ref. amplitude 1H | 0.000 V        |

**Physio - Signal1**

|                 |         |
|-----------------|---------|
| 1st Signal/Mode | None    |
| TR              | 5000 ms |

**Sequence - Common**

|                      |         |
|----------------------|---------|
| Introduction         | On      |
| Preparation scans    | 2       |
| Delta frequency      | 0.0 ppm |
| Phase cycling        | Auto    |
| Bandwidth            | 6000 Hz |
| Acquisition duration | 341 ms  |
| Remove oversampling  | On      |

**Sequence - Nuclei**

|                       |      |
|-----------------------|------|
| TX/RX Nucleus         | 1H   |
| TX/RX delta frequency | 0 Hz |
| TX Nucleus            | None |
| TX delta frequency    | 0 Hz |
| Coil elements         | PFC  |

**Sequence - Special**

|                        |           |
|------------------------|-----------|
| RF pulse duration      | 1280 us   |
| Spoiler max. amplitude | 30.0 mT/m |

**Sequence - Special**

|                      |         |
|----------------------|---------|
| Refocus grad. factor | 1.00    |
| Spoiler duration     | 1500 us |
| Acq. window shift    | 200 us  |
| Min. settling delay  | 100 us  |
| Gradient ramp time   | 200 us  |
| VAPOR flip angle     | 60 deg  |
| VAPOR delay 8        | 16 ms   |
| VAPOR delay 7        | 66 ms   |
| VAPOR delay 6        | 71 ms   |
| VAPOR delay 5        | 112 ms  |
| VAPOR delay 4        | 115 ms  |
| VAPOR delay 3        | 132 ms  |
| VAPOR delay 2        | 110 ms  |
| VAPOR delay 1        | 160 ms  |
| Enable OVS           | Off     |
| Send ref. scans      | Off     |
| Inversion pulse      | Off     |
| Symmetric RF pulses  | On      |
| Invert SS grad. pol. | Off     |
| Shift RO frequency   | Off     |
| Debug loop type      | None    |

\\USER\PHCP\MRS\final\PFC steam eja ws FA optimization

TA: 1:08 PM: FIX Vol: 30 ×30 ×15 mmRel. SNR: 1.00 : steam

**Properties**

|                                               |                    |
|-----------------------------------------------|--------------------|
| Prio recon                                    | Off                |
| Load images to viewer                         | On                 |
| Inline movie                                  | Off                |
| Auto store images                             | On                 |
| Load images to stamp segments                 | Off                |
| Load images to graphic segments               | Off                |
| Auto open inline display                      | Off                |
| Auto close inline display                     | Off                |
| Start measurement without further preparation | Off                |
| Wait for user to start                        | Off                |
| Start measurements                            | Single measurement |

**Routine**

|               |                    |
|---------------|--------------------|
| Position      | L1.2 P49.6 H8.9 mm |
| Orientation   | C > T30.0          |
| Rotation      | 0 deg              |
| Vol F >> H    | 30 mm              |
| Vol F >> H    | 30 mm              |
| Vol A >> P    | 15 mm              |
| TR            | 5000 ms            |
| TE            | 8.00 ms            |
| Averages      | 1                  |
| Filter        | None               |
| Coil elements | PFC                |

**Contrast**

|                     |              |
|---------------------|--------------|
| TR                  | 5000 ms      |
| TE                  | 8.00 ms      |
| TM                  | 32.00 ms     |
| Averages            | 1            |
| Flip angle          | 90 deg       |
| VAPOR               | Enabled      |
| VAPOR suppr.        | Water suppr. |
| Water s. BW         | 135 Hz       |
| Water s. delta pos. | 0.00 ppm     |
| Measurements        | 10           |

**Resolution - Common**

|             |      |
|-------------|------|
| Vector size | 2048 |
|-------------|------|

**Geometry - Common**

|             |                    |
|-------------|--------------------|
| Position    | L1.2 P49.6 H8.9 mm |
| Orientation | C > T30.0          |
| Rotation    | 0 deg              |
| Vol F >> H  | 30 mm              |
| Vol R >> L  | 30 mm              |
| Vol A >> P  | 15 mm              |

**Geometry - AutoAlign**

|                     |                 |
|---------------------|-----------------|
| AutoAlign           | Head > Brain    |
| Initial Position    | L1.2 P49.6 H8.9 |
| L                   | 1.2 mm          |
| P                   | 49.6 mm         |
| H                   | 8.9 mm          |
| Initial Rotation    | 0.00 deg        |
| Initial Orientation | C > T           |
| C > T               | 30.0            |
| > S                 | 0.0             |

**System - Miscellaneous**

|                  |                      |
|------------------|----------------------|
| Positioning mode | FIX                  |
| Table position   | H                    |
| Table position   | 0 mm                 |
| MSMA             | S - C - T            |
| Sagittal         | R >> L               |
| Coronal          | A >> P               |
| Transversal      | F >> H               |
| Save uncombined  | Off                  |
| AutoAlign        | Head > Brain         |
| Coil Select Mode | Off - AutoCoilSelect |

**System - Adjustments**

|                          |          |
|--------------------------|----------|
| B0 Shim mode             | Brain    |
| B1 Shim mode             | TrueForm |
| Adj. water suppr.        | Off      |
| Confirm freq. adjustment | Off      |
| Assume Dominant Fat      | Off      |
| Assume Silicone          | Off      |
| Adjustment Tolerance     | Auto     |

**System - Adjust Volume**

|             |                    |
|-------------|--------------------|
| Position    | L1.2 P49.6 H8.9 mm |
| Orientation | C > T30.0          |
| Rotation    | 0.00 deg           |
| R >> L      | 30 mm              |
| F >> H      | 30 mm              |
| A >> P      | 15 mm              |
| Reset       | Off                |

**System - Tx/Rx**

|                     |                |
|---------------------|----------------|
| Frequency 1H        | 297.207726 MHz |
| Correction factor   | 1              |
| Gain                | High           |
| Img. Scale Cor.     | 1.000          |
| Reset               | Off            |
| ? Ref. amplitude 1H | 0.000 V        |

**Physio - Signal1**

|                 |         |
|-----------------|---------|
| 1st Signal/Mode | None    |
| TR              | 5000 ms |

**Sequence - Common**

|                      |          |
|----------------------|----------|
| Introduction         | On       |
| Preparation scans    | 2        |
| Delta frequency      | -1.7 ppm |
| Phase cycling        | Auto     |
| Bandwidth            | 6000 Hz  |
| Acquisition duration | 341 ms   |
| Remove oversampling  | On       |

**Sequence - Nuclei**

|                       |      |
|-----------------------|------|
| TX/RX Nucleus         | 1H   |
| TX/RX delta frequency | 0 Hz |
| TX Nucleus            | None |
| TX delta frequency    | 0 Hz |
| Coil elements         | PFC  |

**Sequence - Special**

|                        |           |
|------------------------|-----------|
| RF pulse duration      | 1280 us   |
| Spoiler max. amplitude | 30.0 mT/m |

**Sequence - Special**

|                      |          |
|----------------------|----------|
| Refocus grad. factor | 1.00     |
| OVS slab thickness   | 100.0 mm |
| OVS slab pos. offset | 5.0 mm   |
| Spoiler duration     | 1500 us  |
| Acq. window shift    | 200 us   |
| Min. settling delay  | 100 us   |
| Gradient ramp time   | 200 us   |
| VAPOR flip angle     | 60 deg   |
| VAPOR delay 8        | 16 ms    |
| VAPOR delay 7        | 66 ms    |
| OVS pulse duration   | 2560 us  |
| OVS flip angle RO    | 90 deg   |
| OVS flip angle PH    | 90 deg   |
| OVS flip angle SL    | 90 deg   |
| VAPOR delay 6        | 71 ms    |
| VAPOR delay 5        | 112 ms   |
| VAPOR delay 4        | 115 ms   |
| VAPOR delay 3        | 132 ms   |
| VAPOR delay 2        | 110 ms   |
| VAPOR delay 1        | 160 ms   |
| Enable OVS           | On       |
| Weighted averages    | Off      |
| Send ref. scans      | Off      |
| Inversion pulse      | Off      |
| Symmetric RF pulses  | On       |
| Invert SS grad. pol. | Off      |
| Shift RO frequency   | Off      |
| Debug loop type      | WS FA    |
| WS FA inc.           | 2 deg    |
| Measurements         | 10       |

\\USER\PHCP\MRS\final\PFC steam eja ws delay 7

TA: 1:08 PM: FIX Vol: 30 ×30 ×15 mmRel. SNR: 1.00 : steam

**Properties**

|                                               |                    |
|-----------------------------------------------|--------------------|
| Prio recon                                    | Off                |
| Load images to viewer                         | On                 |
| Inline movie                                  | Off                |
| Auto store images                             | On                 |
| Load images to stamp segments                 | Off                |
| Load images to graphic segments               | Off                |
| Auto open inline display                      | Off                |
| Auto close inline display                     | Off                |
| Start measurement without further preparation | Off                |
| Wait for user to start                        | Off                |
| Start measurements                            | Single measurement |

**Routine**

|               |                    |
|---------------|--------------------|
| Position      | L1.2 P49.6 H8.9 mm |
| Orientation   | C > T30.0          |
| Rotation      | 0 deg              |
| Vol F >> H    | 30 mm              |
| Vol F >> H    | 30 mm              |
| Vol A >> P    | 15 mm              |
| TR            | 5000 ms            |
| TE            | 8.00 ms            |
| Averages      | 1                  |
| Filter        | None               |
| Coil elements | PFC                |

**Contrast**

|                     |              |
|---------------------|--------------|
| TR                  | 5000 ms      |
| TE                  | 8.00 ms      |
| TM                  | 32.00 ms     |
| Averages            | 1            |
| Flip angle          | 90 deg       |
| VAPOR               | Enabled      |
| VAPOR suppr.        | Water suppr. |
| Water s. BW         | 135 Hz       |
| Water s. delta pos. | 0.00 ppm     |
| Measurements        | 10           |

**Resolution - Common**

|             |      |
|-------------|------|
| Vector size | 2048 |
|-------------|------|

**Geometry - Common**

|             |                    |
|-------------|--------------------|
| Position    | L1.2 P49.6 H8.9 mm |
| Orientation | C > T30.0          |
| Rotation    | 0 deg              |
| Vol F >> H  | 30 mm              |
| Vol R >> L  | 30 mm              |
| Vol A >> P  | 15 mm              |

**Geometry - AutoAlign**

|                     |                 |
|---------------------|-----------------|
| AutoAlign           | Head > Brain    |
| Initial Position    | L1.2 P49.6 H8.9 |
| L                   | 1.2 mm          |
| P                   | 49.6 mm         |
| H                   | 8.9 mm          |
| Initial Rotation    | 0.00 deg        |
| Initial Orientation | C > T           |
| C > T               | 30.0            |
| > S                 | 0.0             |

**System - Miscellaneous**

|                  |                      |
|------------------|----------------------|
| Positioning mode | FIX                  |
| Table position   | H                    |
| Table position   | 0 mm                 |
| MSMA             | S - C - T            |
| Sagittal         | R >> L               |
| Coronal          | A >> P               |
| Transversal      | F >> H               |
| Save uncombined  | Off                  |
| AutoAlign        | Head > Brain         |
| Coil Select Mode | Off - AutoCoilSelect |

**System - Adjustments**

|                          |          |
|--------------------------|----------|
| B0 Shim mode             | Brain    |
| B1 Shim mode             | TrueForm |
| Adj. water suppr.        | Off      |
| Confirm freq. adjustment | Off      |
| Assume Dominant Fat      | Off      |
| Assume Silicone          | Off      |
| Adjustment Tolerance     | Auto     |

**System - Adjust Volume**

|             |                    |
|-------------|--------------------|
| Position    | L1.2 P49.6 H8.9 mm |
| Orientation | C > T30.0          |
| Rotation    | 0.00 deg           |
| R >> L      | 30 mm              |
| F >> H      | 30 mm              |
| A >> P      | 15 mm              |
| Reset       | Off                |

**System - Tx/Rx**

|                     |                |
|---------------------|----------------|
| Frequency 1H        | 297.207726 MHz |
| Correction factor   | 1              |
| Gain                | High           |
| Img. Scale Cor.     | 1.000          |
| Reset               | Off            |
| ? Ref. amplitude 1H | 0.000 V        |

**Physio - Signal1**

|                 |         |
|-----------------|---------|
| 1st Signal/Mode | None    |
| TR              | 5000 ms |

**Sequence - Common**

|                      |          |
|----------------------|----------|
| Introduction         | On       |
| Preparation scans    | 2        |
| Delta frequency      | -1.7 ppm |
| Phase cycling        | Auto     |
| Bandwidth            | 6000 Hz  |
| Acquisition duration | 341 ms   |
| Remove oversampling  | On       |

**Sequence - Nuclei**

|                       |      |
|-----------------------|------|
| TX/RX Nucleus         | 1H   |
| TX/RX delta frequency | 0 Hz |
| TX Nucleus            | None |
| TX delta frequency    | 0 Hz |
| Coil elements         | PFC  |

**Sequence - Special**

|                        |           |
|------------------------|-----------|
| RF pulse duration      | 1280 us   |
| Spoiler max. amplitude | 30.0 mT/m |

**Sequence - Special**

|                      |            |
|----------------------|------------|
| Refocus grad. factor | 1.00       |
| OVS slab thickness   | 100.0 mm   |
| OVS slab pos. offset | 5.0 mm     |
| Spoiler duration     | 1500 us    |
| Acq. window shift    | 200 us     |
| Min. settling delay  | 100 us     |
| Gradient ramp time   | 200 us     |
| VAPOR flip angle     | 60 deg     |
| VAPOR delay 8        | 16 ms      |
| VAPOR delay 7        | 66 ms      |
| OVS pulse duration   | 2560 us    |
| OVS flip angle RO    | 90 deg     |
| OVS flip angle PH    | 90 deg     |
| OVS flip angle SL    | 90 deg     |
| VAPOR delay 6        | 71 ms      |
| VAPOR delay 5        | 112 ms     |
| VAPOR delay 4        | 115 ms     |
| VAPOR delay 3        | 132 ms     |
| VAPOR delay 2        | 110 ms     |
| VAPOR delay 1        | 160 ms     |
| Enable OVS           | On         |
| Weighted averages    | Off        |
| Send ref. scans      | Off        |
| Inversion pulse      | Off        |
| Symmetric RF pulses  | On         |
| Invert SS grad. pol. | Off        |
| Shift RO frequency   | Off        |
| Debug loop type      | WS delay 7 |
| WS delay 7 inc.      | 3 ms       |
| Measurements         | 10         |
